# Supplementary material
Source: PubMed Central journal article supplement (PMC3076670)
Supplement: NIHMS257716-supplement-1.pdf [file NIHMS257716-supplement-1.pdf]

**Supplementary Figure 1.** The early phase of ABC<sub>16</sub>-monster construction.

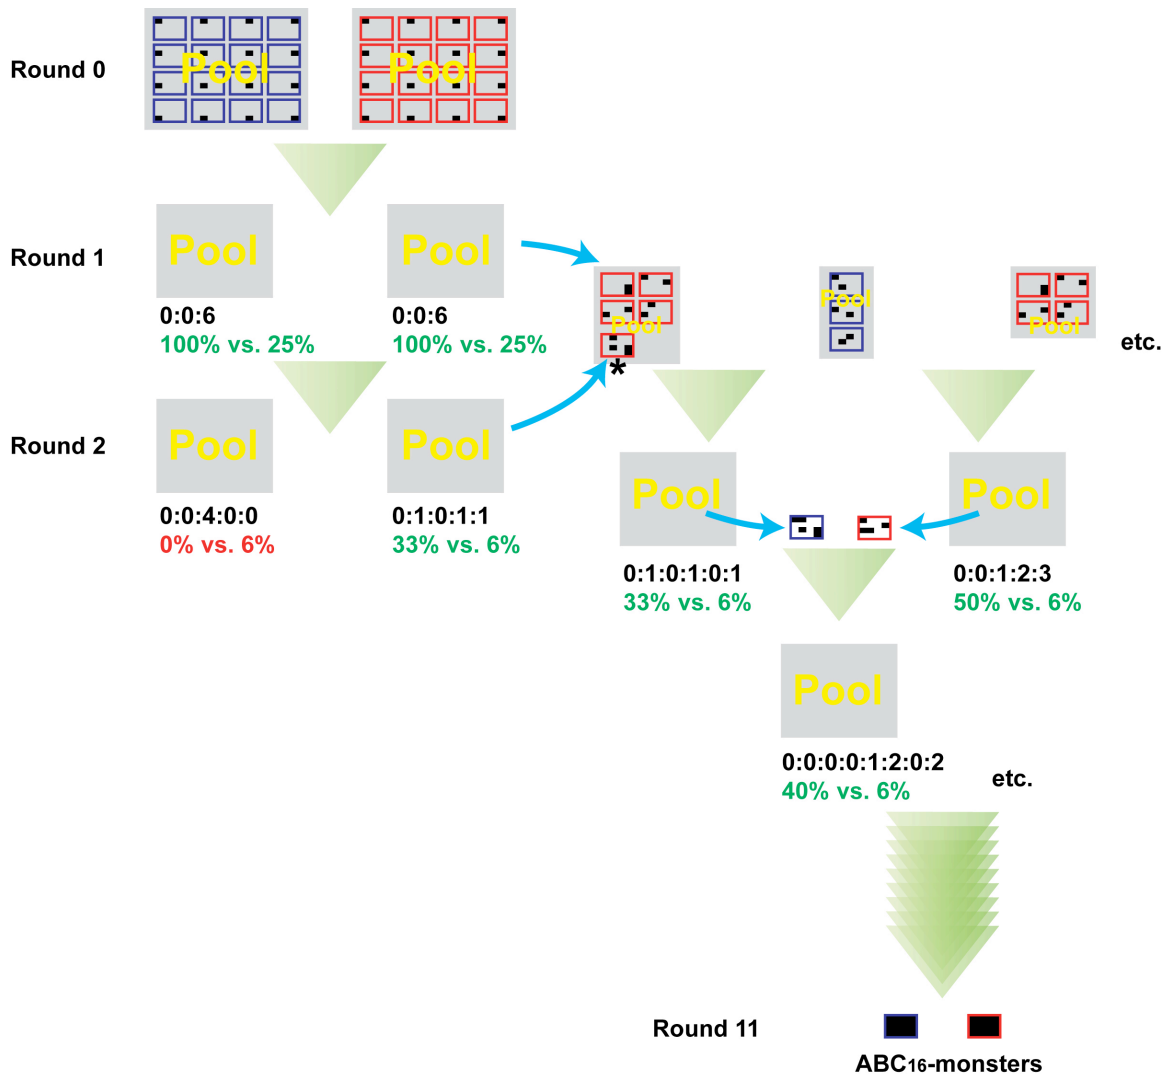

Each rectangle outlined in blue (*MATa* strains) or red (*MATα*) represents a strain. Positions of darkened rectangles within each strain rectangle indicate genes deleted within that strain. From left to right along each row, and descending from the top row, darkened positions correspond to *adp1Δ*, *snq2Δ*, *ycf1Δ*, *pdr15Δ*, *yor1Δ*, *vmr1Δ*, *pdr11Δ*, *nft1Δ*, *bpt1Δ*, *ybt1Δ*, *ynr070wΔ*, *yol075cΔ*, *aus1Δ*, *pdr5Δ*, *pdr10Δ*, and *pdr12Δ*. Green triangle indicates one round of the Green Monster process. Blue arrow indicates that strains were isolated from the resulting population from a Green Monster process. The one strain marked with asterisk was derived from the second round. Percentages refer to the experimentally determined fraction of sorted cells (left) and the expected fraction of unsorted cells (right) carrying the maximum theoretically achievable number of deletions in that round. Numbers of genotyped strains are shown above the percentages, starting from zero-deletion strains and ending with strains with the highest possible number of deletions. The rest of the lineage is shown in **Supplementary Fig. 2** online.

**Supplementary Figure 2.** The later phase of ABC<sub>16</sub>-monster construction.

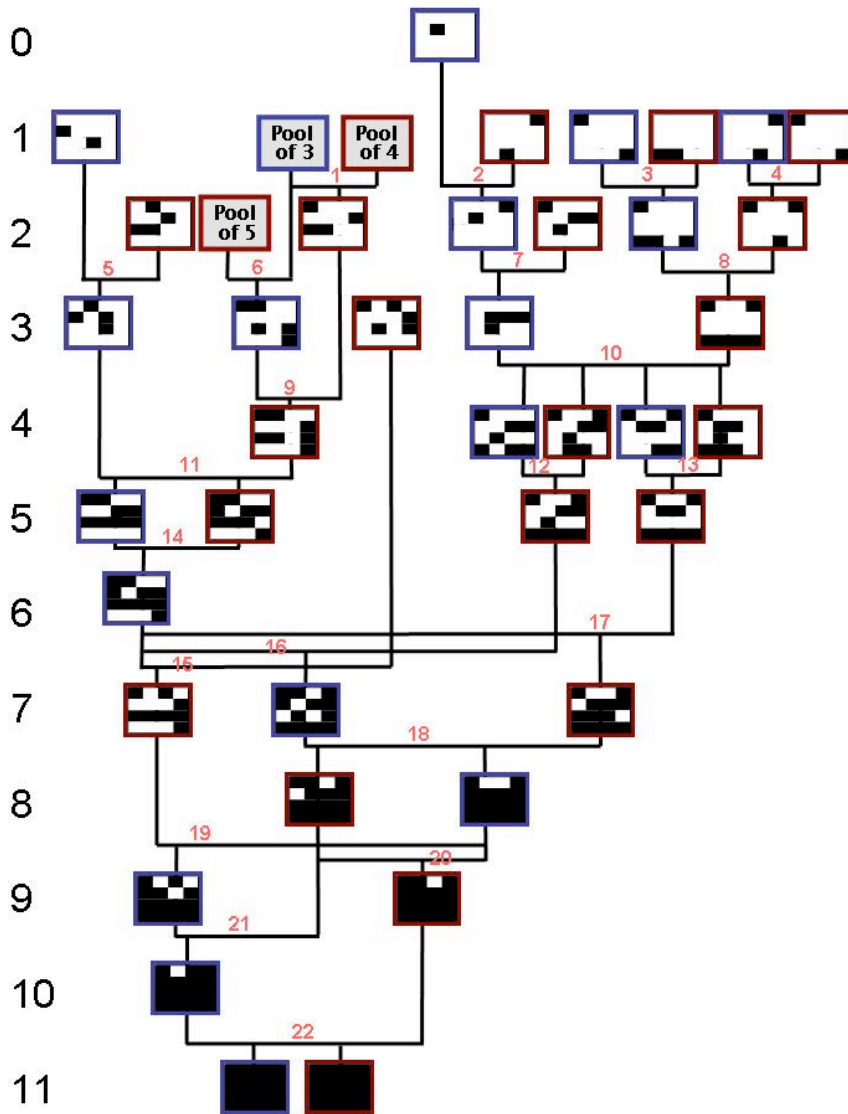

As in **Supplementary Fig. 1** online, each strain is indicated with a blue or red rectangle filled with darkened rectangles. The sexual cycling of the Green Monster process was performed in each round. The number of rounds experienced by strains since the initial single mutants is shown on the left. Strains without links to parental strains were obtained using *en masse* mating of pooled strains of opposite mating type. Number in red identifies the cross in this figure and in **Supplementary Table 2**.

**Supplementary Figure 3.** Karyotypes of ABC<sub>16</sub>-monster and wild-type strains.

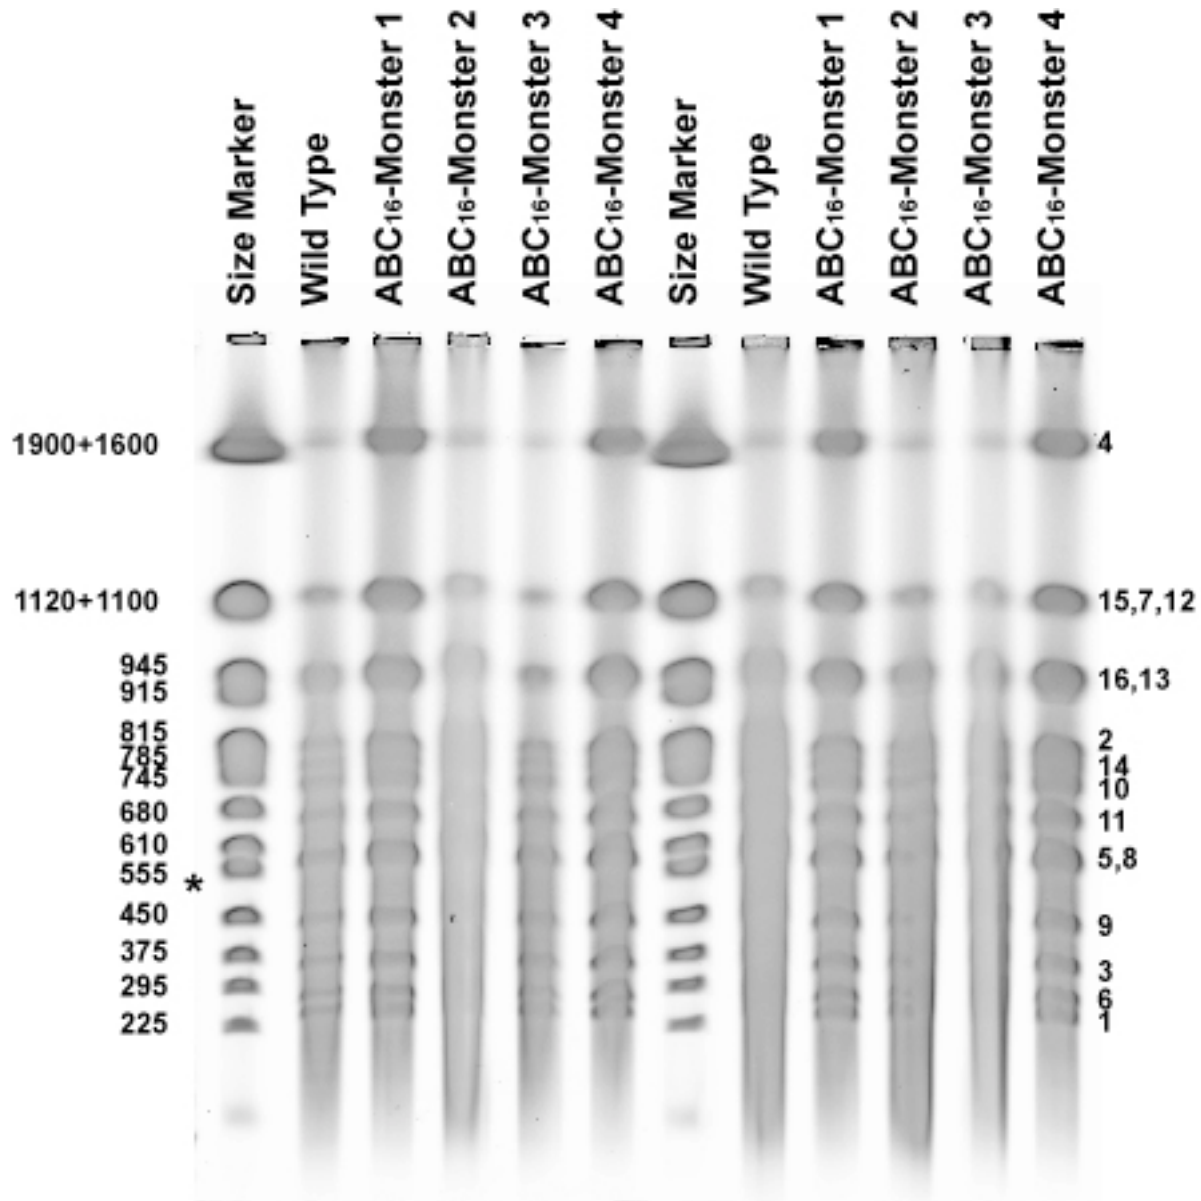

Genomic DNA samples were analyzed using pulsed-field gel electrophoresis. The identical samples were loaded twice. The band patterns were very similar for ABC<sub>16</sub>-monster strains (1: RY0513, 2: RY0518, 3: RY0519, and 4: RY0523) and wild type (BY4741). The four ABC<sub>16</sub>-monster strains were derived from slightly different branches of the lineage (**Supplementary Fig. 8** online). Size marker is NEB Yeast Chromosome PFG Marker, with band sizes in kb indicated on the left. Chromosome numbers for bands of our samples are indicated on the right.

In the experiment described in **Supplementary Fig. 4** online, amplification of the GFP cassettes for *yll048cΔ* and *ypl058cΔ* required a more robust enzyme than *Taq* polymerase. However, these loci are unlikely to be involved in translocation. Recombination between them would result in the loss of normal chromosomes 12 and 16 and the emergence of bands at 1480 kb and 542 kb. Although changes in the large size range may be difficult to detect, the 542-kb recombinant chromosome band is clearly absent around the asterisk.

**Supplementary Figure 4.** Evidence for lack of recombination between GFP cassettes within four ABC<sub>16</sub>-monster isolates.

|             |  | Strain                    |   |   |   |   |   |   |   |   |   |   |   |   |   |   | ABC <sub>16</sub> -monsters |   |   |   | Non-mutant |   |
|-------------|--|---------------------------|---|---|---|---|---|---|---|---|---|---|---|---|---|---|-----------------------------|---|---|---|------------|---|
|             |  | Single-mutant ProMonsters |   |   |   |   |   |   |   |   |   |   |   |   |   |   | 1                           | 2 | 3 | 4 |            |   |
| Primer pair |  | a                         | b | c | d | e | f | g | h | i | j | k | m | n | o | p | q                           |   |   |   |            |   |
| a           |  | D                         | - | W | W | W | W | W | W | - | W | W | W | W | W | W | W                           | D | D | D | D          | W |
| b           |  | W                         | D | W | W | W | W | W | W | W | W | W | W | W | W | W | W                           | D | D | D | D          | W |
| c           |  | W                         | W | D | W | W | W | W | W | W | W | W | W | W | W | W | W                           | D | D | D | D          | W |
| d           |  | W                         | W | W | D | - | W | W | W | W | W | W | W | W | W | W | W                           | D | D | D | D          | W |
| e           |  | -                         | - | - | - | D | - | - | - | - | - | - | - | - | - | - | D                           | D | D | D | -          |   |
| f           |  | W                         | W | W | W | W | D | W | W | W | W | W | W | W | W | W | W                           | D | D | D | D          | W |
| g           |  | W                         | W | W | W | W | W | D | W | W | W | W | W | W | W | W | W                           | D | D | D | D          | W |
| h           |  | W                         | W | W | W | W | W | W | D | W | W | W | W | W | W | W | W                           | D | D | D | D          | W |
| i           |  | -                         | - | - | - | - | - | - | - | D | - | - | - | - | - | - | D                           | D | D | D | -          |   |
| j           |  | W                         | W | W | W | W | W | W | W | W | D | W | W | W | W | W | W                           | D | D | D | D          | W |
| k           |  | W                         | W | W | W | W | W | W | W | W | W | D | W | W | W | W | W                           | D | D | D | D          | - |
| m           |  | W                         | W | W | W | W | W | W | W | W | W | D | W | W | W | W | W                           | D | D | D | D          | W |
| n           |  | -                         | - | - | - | - | - | - | - | - | - | - | - | D | - | - | D                           | D | D | D | -          |   |
| o           |  | W                         | W | W | W | W | W | W | W | W | W | W | W | W | D | W | W                           | D | D | D | D          | - |
| p           |  | -                         | - | W | W | W | W | W | W | W | W | W | W | W | W | D | W                           | D | D | D | D          | W |
| q           |  | W                         | W | W | W | W | W | W | W | W | W | W | W | W | W | W | D                           | D | D | D | D          | - |

**Primer set for e**

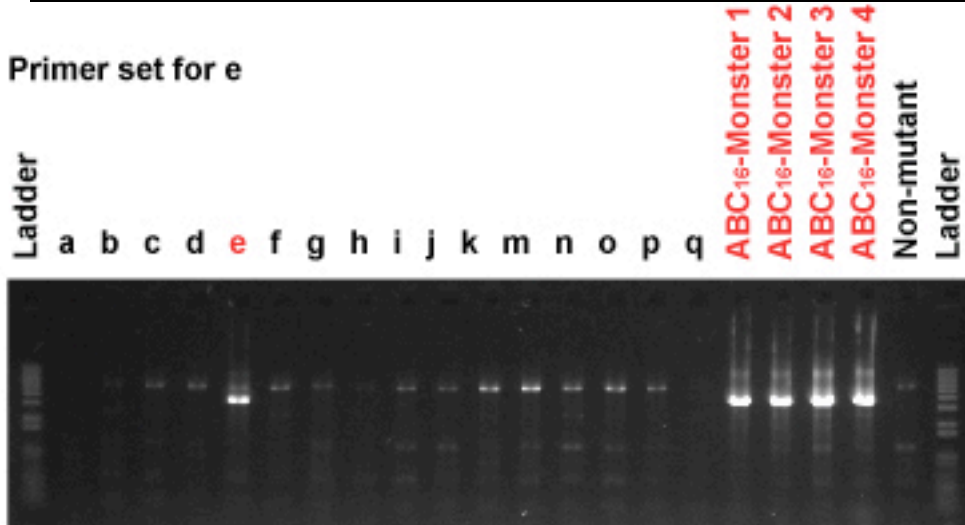

**Primer set for j**

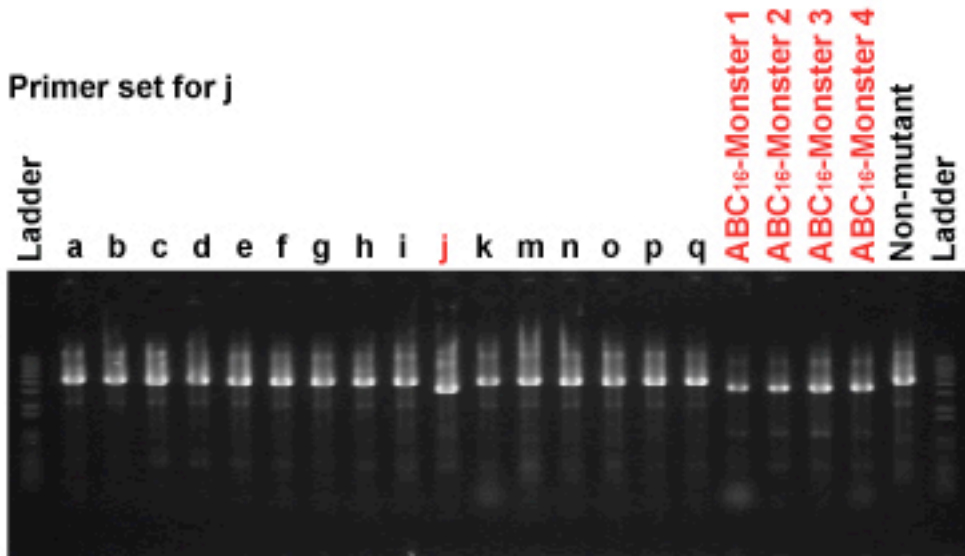

#### Supplementary Figure 4 (continued).

For each ABC transporter locus, primers were targeted to the flanking genomic regions to amplify the entire GFP cassette. Ectopic recombination between two GFP cassettes would be expected to affect our ability to detect the non-recombinant amplicons at the two corresponding loci. A non-mutant control (which has a GFP cassette in the unrelated *HO* gene), all 16 single-mutant ProMonsters, and four ABC<sub>16</sub>-monsters were examined. The ABC<sub>16</sub>-monster strains: isolate 1 (RY0513), isolate 2 (RY0518), isolate 3 (RY0519), and isolate 4 (RY0523) each differed slightly from the others in its construction lineage (**Supplementary Fig. 8** online). Deletions are indicated using codes: “a” for *ynr070wΔ*, “b” for *ygr281wΔ*, “c” for *ycr011cΔ*, “d” for *ydr135cΔ*, “e” for *yhl035cΔ*, “f” for *ydr011wΔ*, “g” for *yll015wΔ*, “h” for *yor011wΔ*, “i” for *ypl058cΔ*, “j” for *ykr103wΔ*, “k” for *yor153wΔ*, “m” for *yil013cΔ*, “n” for *yll048cΔ*, “o” for *yor328wΔ*, “p” for *yol075cΔ*, and “q” for *yde406wΔ*. When PCR was efficient (as in the test for j), bands of about 4-5 kb corresponding to the wild-type transporter sequences were also amplified (denoted ‘W’ in the table). Otherwise (as in the test for e), no bands or only background bands were amplified (denoted ‘-’ in the table). Bands of the correct size (about 3 kb) corresponding to the fragments containing the GFP deletion cassette (denoted ‘D’ in the table) were observed only when strains expected from previous genotyping to be deleted for a particular gene were tested with a primer set for that gene. Strain names for such strains are shown in red above the gels. The four ABC<sub>16</sub>-monster samples all generated bands with all sixteen sets. This result is consistent with the absence of GFP-mediated chromosomal rearrangements. For example, in the gel (lower panel) for the ProMonster corresponding to j, the band for j of the ABC<sub>16</sub>-monster is smaller than the band containing the intact open reading frame and consistent in size with a GFP-replaced locus. It is also clear from the PCR amplicon sizes that multimerization of the GFP sequence within the cassette, a formally possible mechanism for obtaining elevated fluorescence and thus surviving flow cytometric selection, was not observed. Amplification of the GFP cassette from two of the 16 loci (*yll048cΔ* and *ypl058cΔ*) required the Ex *Taq* enzyme (Takara). The need to change enzymes is likely due to these loci simply representing difficult amplicons, because we would expect to detect any rearrangements involving these loci by pulse-field gel electrophoresis analysis (see **Supplementary Fig. 3** online).

**Supplementary Figure 5.** Absence of GFP-mediated rearrangements between two nearby cassettes.

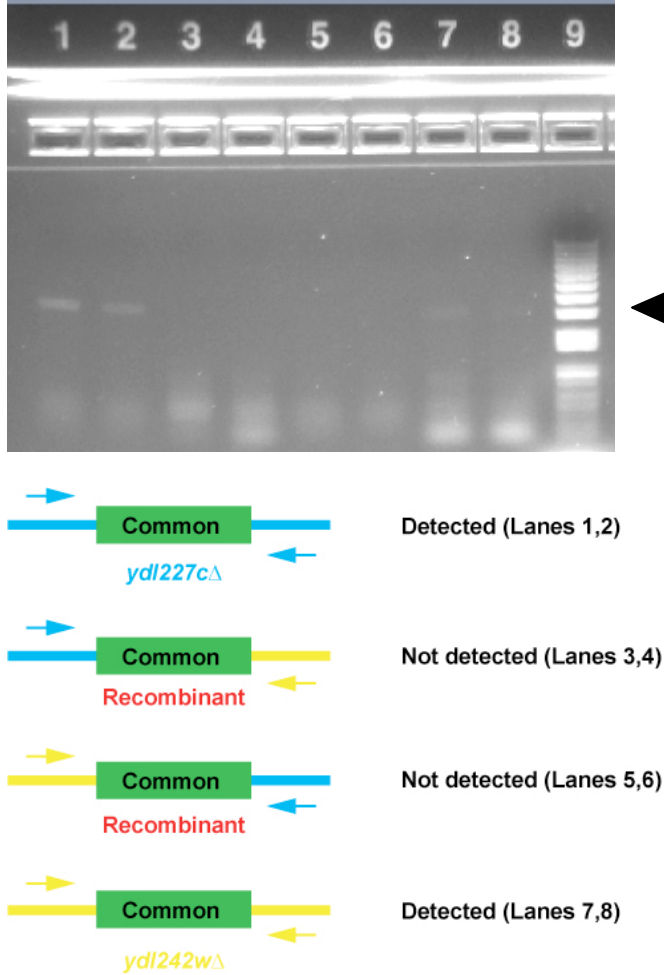

The possibility of frequent rearrangement involving nearby genes was examined using PCR for *YDL242W* and *YDL227C*. DNA samples each representing a mixture of haploid progeny derived from ~30,000 independent meiosis events were analyzed. The parental diploid had the genotype: *ydl227cΔ +/+ ydl242wΔ*. The four possible combinations for primers upstream and downstream of the two genes were used to detect any rearrangement. The gel shows results using the following primers: *YDL227C* upstream/*YDL227C* downstream (lanes 1 and 2), *YDL227C* upstream/*YDL242W* downstream (lanes 3 and 4), *YDL242W* upstream/*YDL227C* downstream (lanes 5 and 6), *YDL242W* upstream/*YDL242W* downstream (lanes 7 and 8). Lane 9 shows the 1 kb Plus ladder (Invitrogen). A >3 kb band (arrowhead) is expected for fragments spanning the GFP cassette. Only two representative PCR samples of the triplicates are shown. In this experiment, primer sets designed to detect a normal chromosome produced a band, whereas primer sets that would detect recombinant chromosomes never did. In the schematic diagram, PCR primers are indicated with arrows. Light blue and yellow lines denote sequences in the *ydl227cΔ* and the *ydl242wΔ* loci, respectively. The common GFP cassette sequence is shown in green.

**Supplementary Figure 6.** Schematic diagram of one implementation of the *en masse* variant of the Green Monster process.

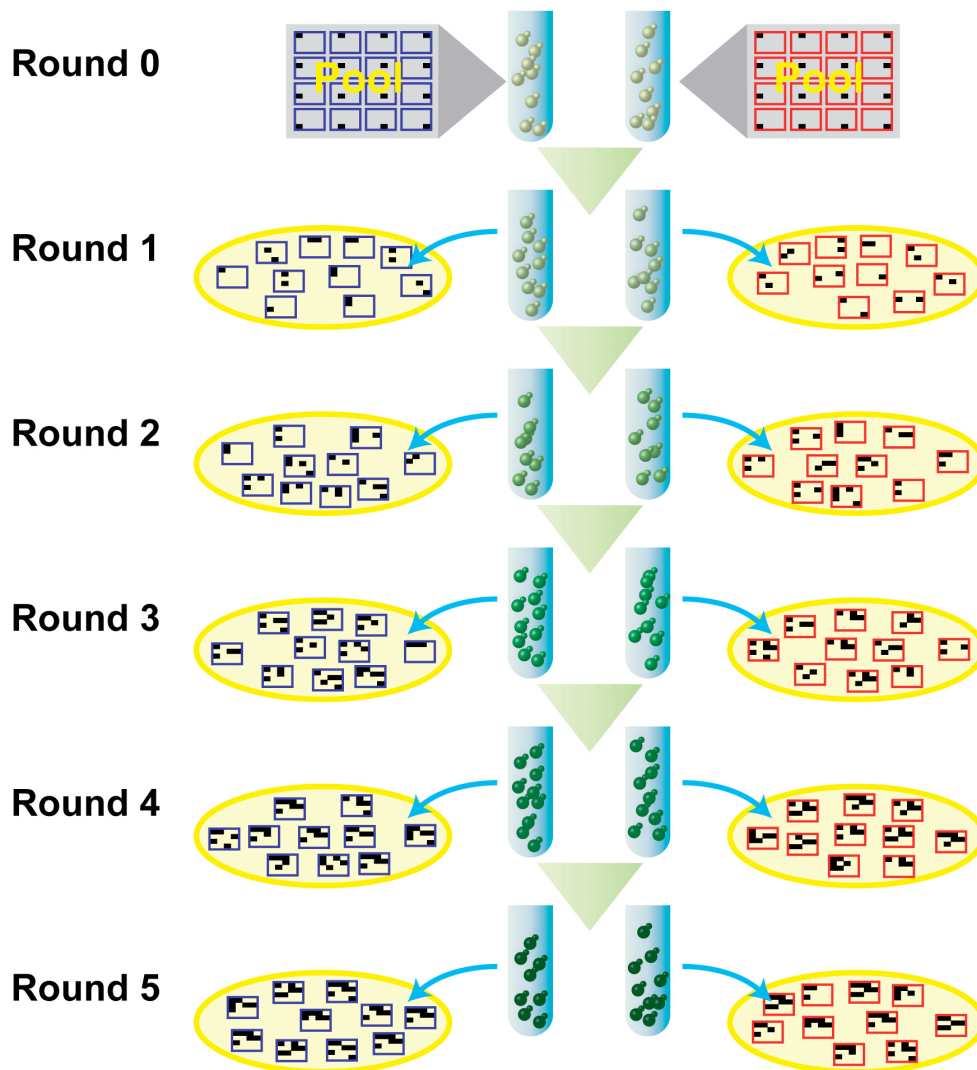

Each strain is indicated with a blue or red rectangle filled with darkened rectangles as in **Supplementary Fig. 1** online. Green triangle indicates one round of the Green Monster process (i.e. mating, sporulation, and FACS sorting). Genotypes shown for colonies isolated on plates (yellow ovals) are from Series 1 data, using the first ten genotyped strains for each mating type from that round. Note that these sampled strains were genotyped solely to gauge progress of the *en masse* process, in contrast with the guided variant of the Green Monster process which uses controlled matings of genotyped strains to ensure representation of less-fit alleles.

Supplementary Figure 7. Schemes for applying the Green Monster process in other species.

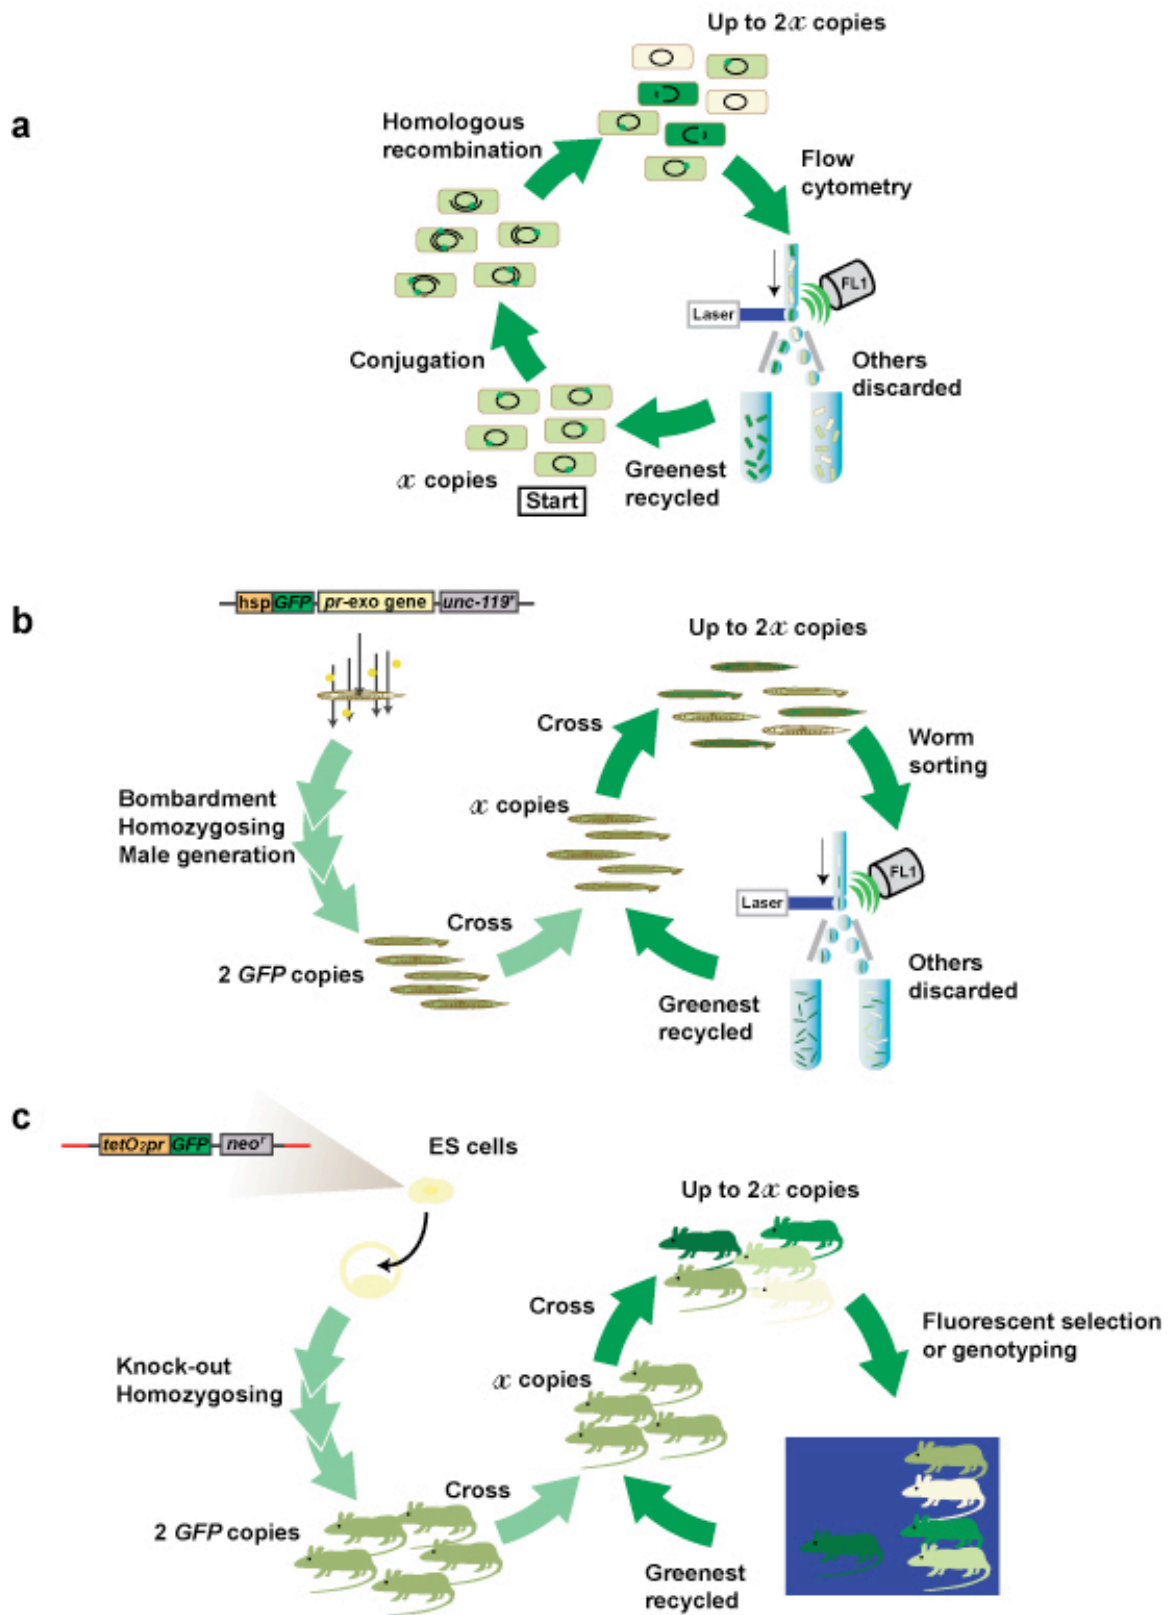



**Supplementary Figure 7** (continued).

**(a)** *E. coli*. Genomic alterations in both F<sup>-</sup> recipient cells and Hfr donor cells are marked with an identical GFP reporter (green tick mark) within the chromosome (black circle) under the control of an inducible (e.g., T7) promoter. Chromosomal fragments are conjugatively transferred from donor to recipient cells, with subsequent homologous recombination and spontaneous loss of one chromosome generating 0-GFP, 1-GFP, and 2-GFP cells. After flow-cytometric sorting, samples enriched for 2-GFP cells (F<sup>-</sup> and Hfr cells) are used for the next round of the Green Monster process. **(b)** *C. elegans*. Although gene targeting is difficult in *C. elegans*, exogenous genes can be integrated to random locations in the genome, e.g., using bombardment with gold particles (yellow circles). The gene insertion cassette carries a GFP reporter with an inducible (e.g., heat-shock) promoter and an integration marker (e.g., *unc-119*<sup>+</sup>, where the target strain is an *unc-119(lf)* mutant). After homozygosing the insertion, a standard protocol is used to generate males (depicted with a hooked tail at right) for each single insertion strain. Gene insertion strains are pooled and mated *en masse* to generate heterozygotes for two of starting insertions. Progeny are crossed to generate a complex population of strains carrying zero to four insertions. Strains carrying four insertions should be the greenest and are selected using a worm sorter for the next cross. The number of insertions should grow in each round of the Green Monster process. **(c)** Mouse. Standard gene-targeting methods are used to generate knock-out mouse strains each carrying an identical *tetO<sub>2</sub>-GFP* reporter in a targeted gene. *neo<sup>r</sup>* is a neomycin-resistance marker for transfection of embryonic stem cells. ES cells with successful replacement are injected into blastocysts (yellow hollow circle), which when implanted becomes a chimeric mouse. Established knock-out mice are mated to combine deletion loci. Mating plugs prevent females from mating productively with multiple males. Therefore, ‘*en masse*’ mating is achieved via artificial insemination using pre-mixed sperm derived from several males. Doxycycline-fed mice can be efficiently screened for macroscopic fluorescence under a UV illuminator.

**Supplementary Figure 8.** Later part of the lineage of the ABC16-monsters.

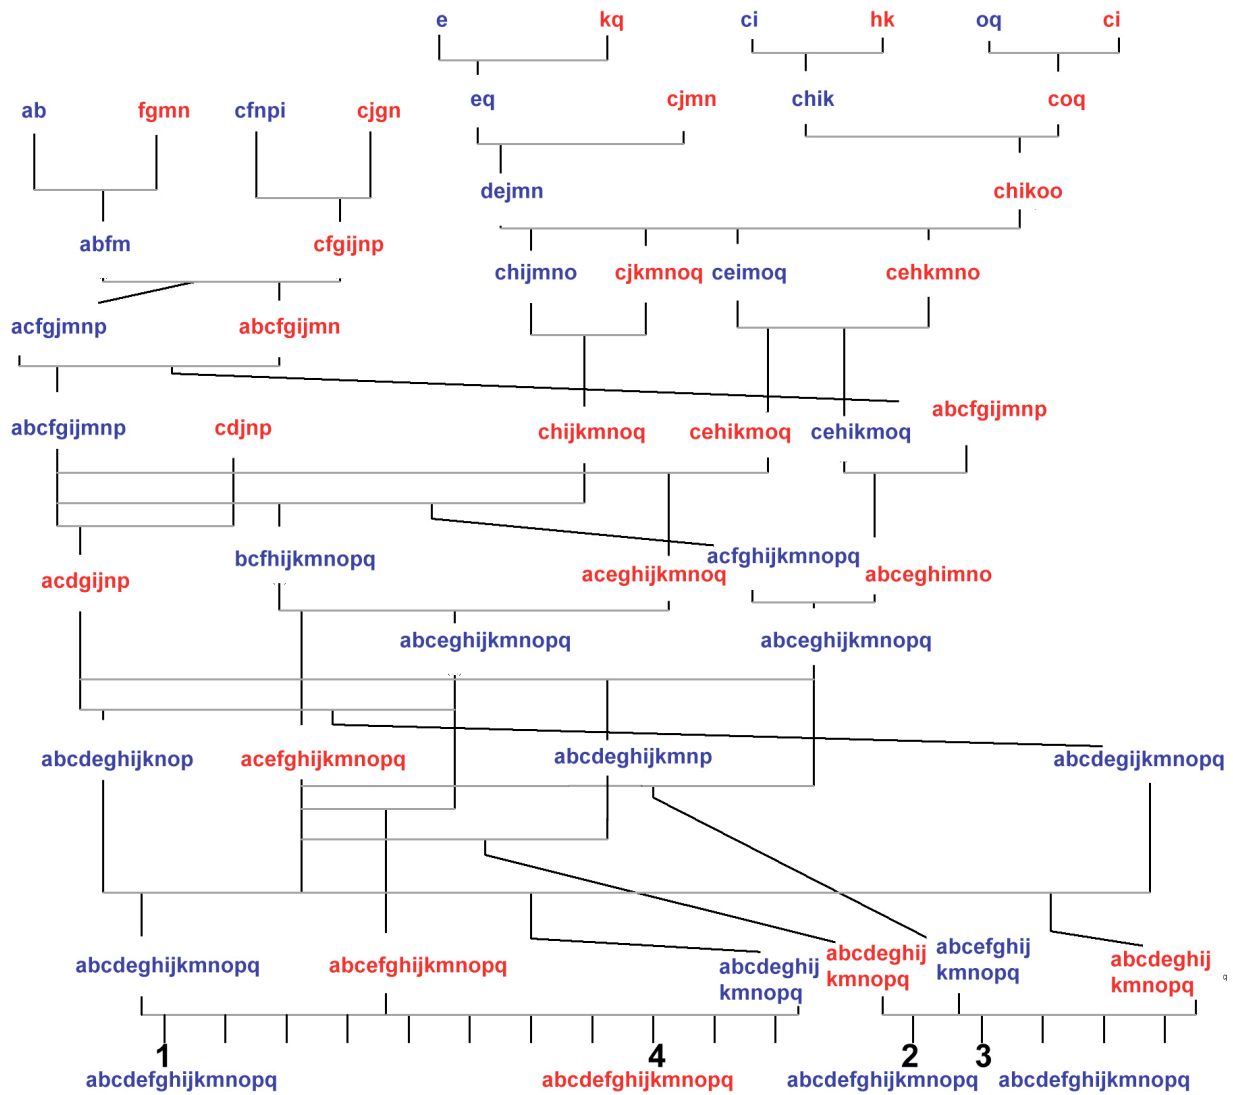

Genotypes of the strains are indicated using codes: a for *ynr070wΔ*, b for *ygr281wΔ*, c for *ycr011cΔ*, d for *ydr135cΔ*, e for *yhl035cΔ*, f for *ydr011wΔ*, g for *yll015wΔ*, h for *yor011wΔ*, i for *yp1058cΔ*, j for *ykr103wΔ*, k for *yor153wΔ*, m for *yil013cΔ*, n for *yll048cΔ*, o for *yor328wΔ*, p for *yol075cΔ*, and q for *yde406wΔ*. Blue indicates a *MATa* strain; red indicates a *MATα* strain. The ABC<sub>16</sub>-monster strains analyzed for detecting chromosomal rearrangements are indicated with 1, 2, 3, and 4.

**Supplementary Table 1.** Common Interpro entries in *S. cerevisiae*.This chart was obtained from [http://www.ensembl.org/Saccharomyces\\_cerevisiae/Info/IPtop500](http://www.ensembl.org/Saccharomyces_cerevisiae/Info/IPtop500) on 9/19/2009.Types for entries are defined in [http://www.ebi.ac.uk/interpro/user\\_manual.html#type](http://www.ebi.ac.uk/interpro/user_manual.html#type). Entries marked as families are indicated.

| No. | Interpro ID | Interpro name                                               | Number of genes | Interpro type (1: Family) |
|-----|-------------|-------------------------------------------------------------|-----------------|---------------------------|
| 1   | IPR011009   | Protein kinase-like                                         | 132             |                           |
| 2   | IPR003593   | AAA+ ATPase - core                                          | 128             |                           |
| 3   | IPR000719   | Protein kinase - core                                       | 121             |                           |
| 4   | IPR002290   | Serine/threonine protein kinase                             | 116             |                           |
| 5   | IPR001245   | Tyrosine protein kinase                                     | 112             |                           |
| 6   | IPR008271   | Serine/threonine protein kinase - active site               | 111             |                           |
| 7   | IPR011046   | WD40 repeat-like                                            | 108             |                           |
| 8   | IPR001680   | WD40 repeat                                                 | 107             |                           |
| 9   | IPR014001   | DEAD-like helicase - N-terminal                             | 90              |                           |
| 10  | IPR000694   | Proline-rich region                                         | 88              |                           |
| 11  | IPR015820   | Retrotransposon Ty1 A - N-terminal                          | 80              |                           |
| 12  | IPR001650   | DNA/RNA helicase - C-terminal                               | 79              |                           |
| 13  | IPR011701   | Major facilitator superfamily MFS-1                         | 77              | 1                         |
| 14  | IPR012337   | Polynucleotidyl transferase - Ribonuclease H fold           | 64              |                           |
| 15  | IPR007114   | Major facilitator superfamily                               | 62              |                           |
| 16  | IPR011545   | DNA/RNA helicase - DEAD/DEAH box type - N-terminal          | 58              |                           |
| 17  | IPR000504   | RNA recognition motif - RNP-1                               | 58              |                           |
| 18  | IPR001138   | Fungal transcriptional regulatory protein - N-terminal      | 56              |                           |
| 19  | IPR009007   | Peptidase aspartic - catalytic                              | 53              |                           |
| 20  | IPR007087   | Zinc finger - C2H2-type                                     | 52              |                           |
| 21  | IPR001841   | Zinc finger - RING-type                                     | 47              |                           |
| 22  | IPR015880   | Zinc finger - C2H2-like                                     | 46              |                           |
| 23  | IPR001806   | Ras GTPase                                                  | 45              | 1                         |
| 24  | IPR001584   | Integrase - catalytic core                                  | 44              |                           |
| 25  | IPR005225   | Small GTP-binding protein domain                            | 43              |                           |
| 26  | IPR012336   | Thioredoxin-like fold                                       | 43              |                           |
| 27  | IPR013103   | Reverse transcriptase - RNA-dependent DNA polymerase        | 42              |                           |
| 28  | IPR005828   | General substrate transporter                               | 38              | 1                         |
| 29  | IPR005829   | Sugar transporter superfamily                               | 37              |                           |
| 30  | IPR001969   | Peptidase aspartic - active site                            | 36              |                           |
| 31  | IPR015424   | Pyridoxal phosphate-dependent transferase - major region    | 35              |                           |
| 32  | IPR003579   | Ras small GTPase - Rab type                                 | 34              | 1                         |
| 33  | IPR009053   | Prefoldin                                                   | 34              |                           |
| 34  | IPR013684   | Miro-like                                                   | 34              |                           |
| 35  | IPR001993   | Mitochondrial substrate carrier                             | 34              | 1                         |
| 36  | IPR000357   | HEAT                                                        | 33              |                           |
| 37  | IPR000104   | Antifreeze protein - type I                                 | 33              | 1                         |
| 38  | IPR003439   | ABC transporter related                                     | 33              |                           |
| 39  | IPR013753   | Ras                                                         | 33              | 1                         |
| 40  | IPR003959   | AAAATPase - core                                            | 33              |                           |
| 41  | IPR013026   | Tetratricopeptide region                                    | 33              |                           |
| 42  | IPR002067   | Mitochondrial carrier protein                               | 32              | 1                         |
| 43  | IPR009057   | Homeodomain-like                                            | 32              |                           |
| 44  | IPR003663   | Sugar transporter                                           | 32              | 1                         |
| 45  | IPR000992   | Stress-induced protein SRP1/TIP1                            | 31              | 1                         |
| 46  | IPR003577   | Ras small GTPase - Ras type                                 | 31              | 1                         |
| 47  | IPR001849   | Pleckstrin-like                                             | 29              |                           |
| 48  | IPR009072   | Histone-fold                                                | 29              |                           |
| 49  | IPR011028   | Cyclin-like                                                 | 28              |                           |
| 50  | IPR002048   | Calcium-binding EF-hand                                     | 28              |                           |
| 51  | IPR003578   | Ras small GTPase - Rho type                                 | 26              | 1                         |
| 52  | IPR007219   | Fungal specific transcription factor                        | 26              |                           |
| 53  | IPR005834   | Haloacid dehalogenase-like hydrolase                        | 25              |                           |
| 54  | IPR010989   | t-SNARE                                                     | 25              |                           |
| 55  | IPR004841   | Amino acid permease-associated region                       | 24              |                           |
| 56  | IPR001452   | Src homology-3                                              | 23              |                           |
| 57  | IPR000533   | Tropomyosin                                                 | 23              | 1                         |
| 58  | IPR001142   | Yeast membrane protein DUP                                  | 23              | 1                         |
| 59  | IPR001005   | SANT - DNA-binding                                          | 23              |                           |
| 60  | IPR002041   | Ran GTPase                                                  | 22              | 1                         |
| 61  | IPR006688   | ADP-ribosylation factor                                     | 22              | 1                         |
| 62  | IPR011011   | Zinc finger - FYVE/PHD-type                                 | 22              |                           |
| 63  | IPR001440   | Tetratricopeptide TPR-1                                     | 22              |                           |
| 64  | IPR001623   | Heat shock protein DnaJ - N-terminal                        | 22              |                           |
| 65  | IPR011032   | GroES-like                                                  | 21              |                           |
| 66  | IPR004843   | Metallophosphoesterase                                      | 21              |                           |
| 67  | IPR000629   | RNA helicase - ATP-dependent - DEAD-box type                | 21              |                           |
| 68  | IPR002347   | Glucose/ribitol dehydrogenase                               | 21              | 1                         |
| 69  | IPR002110   | Ankyrin                                                     | 21              |                           |
| 70  | IPR003960   | AAAATPase - subdomain                                       | 21              |                           |
| 71  | IPR013105   | Tetratricopeptide TPR2                                      | 20              |                           |
| 72  | IPR011511   | Variant SH3                                                 | 20              |                           |
| 73  | IPR013154   | Alcohol dehydrogenase GroES-like                            | 20              |                           |
| 74  | IPR004840   | Amino acid permease                                         | 19              |                           |
| 75  | IPR010920   | Like-Sm ribonucleoprotein-related - core                    | 19              |                           |
| 76  | IPR013027   | FAD-dependent pyridine nucleotide-disulphide oxidoreductase | 19              |                           |
| 77  | IPR002113   | Adenine nucleotide translocator 1                           | 18              | 1                         |

|     |           |                                                                                        |    |
|-----|-----------|----------------------------------------------------------------------------------------|----|
| 78  | IPR001394 | Peptidase C19 - ubiquitin carboxyl-terminal hydrolase 2                                | 18 |
| 79  | IPR006670 | Cyclin                                                                                 | 18 |
| 80  | IPR004762 | Yeast amino acid permease                                                              | 17 |
| 81  | IPR011012 | Longin-like                                                                            | 17 |
| 82  | IPR006195 | Aminoacyl-tRNA synthetase - class II                                                   | 17 |
| 83  | IPR013149 | Alcohol dehydrogenase - zinc-binding                                                   | 17 |
| 84  | IPR001412 | Aminoacyl-tRNA synthetase - class I                                                    | 17 |
| 85  | IPR001100 | Pyridine nucleotide-disulphide oxidoreductase - class I                                | 17 |
| 86  | IPR000330 | SNF2-related                                                                           | 17 |
| 87  | IPR000795 | Protein synthesis factor - GTP-binding                                                 | 17 |
| 88  | IPR001965 | Zinc finger - PHD-type                                                                 | 17 |
| 89  | IPR001878 | Zinc finger - CCHC-type                                                                | 17 |
| 90  | IPR001395 | Aldo/keto reductase                                                                    | 17 |
| 91  | IPR000886 | Endoplasmic reticulum targeting sequence                                               | 17 |
| 92  | IPR000727 | Target SNARE coiled-coil region                                                        | 16 |
| 93  | IPR002198 | Short-chain dehydrogenase/reductase SDR                                                | 16 |
| 94  | IPR006649 | Like-Sm ribonucleoprotein - eukaryotic and archaea-type - core                         | 16 |
| 95  | IPR001757 | ATPase - P-type - K/Mg/Cd/Cu/Zn/Na/Ca/Na/H-transporter                                 | 16 |
| 96  | IPR001163 | Like-Sm ribonucleoprotein - core                                                       | 16 |
| 97  | IPR004827 | Basic-leucine zipper (bZIP) transcription factor                                       | 16 |
| 98  | IPR008936 | Rho GTPase activation protein                                                          | 15 |
| 99  | IPR001683 | Phox-like                                                                              | 15 |
| 100 | IPR014778 | Myb - DNA-binding                                                                      | 15 |
| 101 | IPR003954 | RNA recognition - region 1                                                             | 15 |
| 102 | IPR008927 | 6-phosphogluconate dehydrogenase - C-terminal-like                                     | 15 |
| 103 | IPR009060 | UBA-like                                                                               | 15 |
| 104 | IPR000608 | Ubiquitin-conjugating enzyme - E2                                                      | 15 |
| 105 | IPR008984 | SMAD/FHA                                                                               | 15 |
| 106 | IPR000253 | Forkhead-associated                                                                    | 15 |
| 107 | IPR004161 | Translation elongation factor EFTu/EF1A - domain 2                                     | 15 |
| 108 | IPR014756 | Immunoglobulin E-set                                                                   | 15 |
| 109 | IPR010978 | tRNA-binding arm                                                                       | 15 |
| 110 | IPR000073 | Alpha/beta hydrolase fold-1                                                            | 15 |
| 111 | IPR011704 | ATPase associated with various cellular activities - AAA-5                             | 15 |
| 112 | IPR001023 | Heat shock protein Hsp70                                                               | 14 |
| 113 | IPR008262 | Lipase - active site                                                                   | 14 |
| 114 | IPR006671 | Cyclin - N-terminal                                                                    | 14 |
| 115 | IPR006162 | Phosphopantetheine attachment site                                                     | 14 |
| 116 | IPR013126 | Heat shock protein 70                                                                  | 14 |
| 117 | IPR001353 | 20S proteasome - A and B subunits                                                      | 14 |
| 118 | IPR001810 | Cyclin-like F-box                                                                      | 14 |
| 119 | IPR006186 | Serine/threonine-specific protein phosphatase and bis(5-nucleosyl)-tetrakisphosphatase | 14 |
| 120 | IPR000626 | Ubiquitin                                                                              | 13 |
| 121 | IPR000182 | GCN5-related N-acetyltransferase                                                       | 13 |
| 122 | IPR002917 | GTP-binding protein - HSR1-related                                                     | 13 |
| 123 | IPR003095 | Heat shock protein DnaJ                                                                | 13 |
| 124 | IPR013216 | Methyltransferase type 11                                                              | 13 |
| 125 | IPR008985 | Concanavalin A-like lectin/glucanase                                                   | 13 |
| 126 | IPR002409 | Aflatoxin biosynthesis regulatory protein                                              | 13 |
| 127 | IPR008979 | Galactose-binding like                                                                 | 12 |
| 128 | IPR006689 | ARF/SAR superfamily                                                                    | 12 |
| 129 | IPR001859 | Ribosomal protein P2                                                                   | 12 |
| 130 | IPR010987 | Glutathione S-transferase - C-terminal-like                                            | 12 |
| 131 | IPR003604 | Zinc finger - U1-type                                                                  | 12 |
| 132 | IPR007414 | Protein of unknown function DUF468                                                     | 12 |
| 133 | IPR008991 | Translation protein SH3-like                                                           | 12 |
| 134 | IPR000195 | RabGAP/TBC                                                                             | 12 |
| 135 | IPR000961 | Protein kinase - C-terminal                                                            | 12 |
| 136 | IPR008250 | E1-E2 ATPase-associated region                                                         | 12 |
| 137 | IPR002328 | Alcohol dehydrogenase - zinc-containing                                                | 12 |
| 138 | IPR008973 | C2 calcium/lipid-binding region - CaLB                                                 | 12 |
| 139 | IPR001611 | Leucine-rich repeat                                                                    | 12 |
| 140 | IPR013078 | Phosphoglycerate mutase                                                                | 12 |
| 141 | IPR013217 | Methyltransferase type 12                                                              | 12 |
| 142 | IPR004839 | Aminotransferase - class I and II                                                      | 11 |
| 143 | IPR001778 | Pollen allergen Poa pIX/Phl pVI - C-terminal                                           | 11 |
| 144 | IPR000759 | Adrenodoxin reductase                                                                  | 11 |
| 145 | IPR007086 | Zinc finger - C2H2-subtype                                                             | 11 |
| 146 | IPR007125 | Histone core                                                                           | 11 |
| 147 | IPR004000 | Actin/actin-like                                                                       | 11 |
| 148 | IPR000387 | Protein-tyrosine phosphatase - Tyr-specific/dual-specificity type                      | 11 |
| 149 | IPR000198 | RhoGAP                                                                                 | 11 |
| 150 | IPR000008 | C2 calcium-dependent membrane targeting                                                | 11 |
| 151 | IPR011016 | Zinc finger - variant RING-type                                                        | 11 |
| 152 | IPR000873 | AMP-dependent synthetase and ligase                                                    | 11 |
| 153 | IPR009000 | Translation elongation and initiation factors/Ribosomal - beta-barrel                  | 11 |
| 154 | IPR001411 | Tetracycline resistance protein - TetB                                                 | 11 |
| 155 | IPR000836 | Phosphoribosyltransferase                                                              | 11 |
| 156 | IPR005427 | Salmonella/Shigella invasin protein C                                                  | 11 |
| 157 | IPR000571 | Zinc finger - CCCH-type                                                                | 11 |
| 158 | IPR005824 | KOW                                                                                    | 11 |
| 159 | IPR005479 | Carbamoyl-phosphate synthase L chain - ATP-binding                                     | 11 |

|     |           |                                                                                  |    |                        |
|-----|-----------|----------------------------------------------------------------------------------|----|------------------------|
| 160 | IPR001487 | Bromodomain                                                                      | 11 |                        |
| 161 | IPR001763 | Rhodanese-like                                                                   | 11 |                        |
| 162 | IPR000679 | Zinc finger - GATA-type                                                          | 11 |                        |
| 163 | IPR006025 | Peptidase M - neutral zinc metallopeptidases - zinc-binding site                 | 11 |                        |
| 164 | IPR015590 | Aldehyde dehydrogenase                                                           | 11 |                        |
| 165 | IPR003595 | Protein-tyrosine phosphatase - catalytic                                         | 10 |                        |
| 166 | IPR008917 | Eukaryotic transcription factor - Skn-1-like - DNA-binding                       | 10 |                        |
| 167 | IPR013525 | ABC-2 type transporter                                                           | 10 |                        |
| 168 | IPR004331 | SPX - N-terminal                                                                 | 10 |                        |
| 169 | IPR001632 | G-protein - beta subunit                                                         | 10 |                        |
| 170 | IPR001357 | BRCT                                                                             | 10 |                        |
| 171 | IPR001917 | Aminotransferase - class-II                                                      | 10 |                        |
| 172 | IPR000644 | Cystathionine beta-synthase - core                                               | 10 |                        |
| 173 | IPR000717 | Proteasome component region PCI                                                  | 10 |                        |
| 174 | IPR003560 | 2,3-dihydro-2,3-dihydroxybenzoate dehydrogenase                                  | 10 | 1                      |
| 175 | IPR001140 | ABC transporter - transmembrane region                                           | 10 |                        |
| 176 | IPR001991 | Sodium:dicarboxylate symporter                                                   | 10 | 1                      |
| 177 | IPR002314 | Aminoacyl-tRNA synthetase - class II (G - H - P and S)                           | 10 |                        |
| 178 | IPR001248 | Permease for cytosine/purines - uracil - thiamine - allantoin                    | 10 | 1                      |
| 179 | IPR001327 | Pyridine nucleotide-disulphide oxidoreductase - NAD-binding region               | 10 |                        |
| 180 | IPR005135 | Endonuclease/exonuclease/phosphatase                                             | 10 |                        |
| 181 | IPR002423 | Chaperonin Cpn60/TCP-1                                                           | 10 | 1                      |
| 182 | IPR013766 | Thioredoxin domain                                                               | 10 |                        |
| 183 | IPR000420 | Yeast PIR protein repeat                                                         | 10 |                        |
| 184 | IPR003594 | ATP-binding region - ATPase-like                                                 | 10 |                        |
| 185 | IPR012681 | Nucleobase cation symporter-1 - NCS1                                             | 10 | 1                      |
| 186 | IPR011332 | Ribosomal protein - zinc-binding                                                 | 10 |                        |
| 187 | IPR006073 | GTP1/OBG                                                                         | 10 |                        |
| 188 | IPR006935 | Restriction endonuclease - type I - R subunit/Type III - Res subunit             | 10 | 1                      |
| 189 | IPR011053 | Single hybrid motif                                                              | 10 |                        |
| 190 | IPR002464 | DNA/RNA helicase - ATP-dependent - DEAH-box type                                 | 10 | with ≥10<br>42 members |
| 191 | IPR000103 | Pyridine nucleotide-disulphide oxidoreductase - class-II                         | 9  |                        |
| 192 | IPR008950 | GroEL-like chaperone - ATPase                                                    | 9  |                        |
| 193 | IPR008928 | Six-hairpin glycosidase-like                                                     | 9  |                        |
| 194 | IPR009036 | Molybdenum cofactor biosynthesis                                                 | 9  |                        |
| 195 | IPR000194 | ATPase - F1/V1/A1 complex - alpha/beta subunit - nucleotide-binding              | 9  |                        |
| 196 | IPR013922 | Cyclin-related 2                                                                 | 9  | 1                      |
| 197 | IPR001984 | Peptidase S16 - Lon protease                                                     | 9  |                        |
| 198 | IPR015891 | Cyclophilin-like                                                                 | 9  |                        |
| 199 | IPR002194 | Chaperonin TCP-1                                                                 | 9  |                        |
| 200 | IPR004087 | K Homology                                                                       | 9  |                        |
| 201 | IPR001202 | WW/Rsp5/WWP                                                                      | 9  |                        |
| 202 | IPR011598 | Helix-loop-helix DNA-binding                                                     | 9  |                        |
| 203 | IPR000403 | Phosphatidylinositol 3- and 4-kinase - catalytic                                 | 9  |                        |
| 204 | IPR001356 | Homeobox                                                                         | 9  |                        |
| 205 | IPR011146 | Histidine triad-like motif                                                       | 9  |                        |
| 206 | IPR006687 | GTP-binding protein SAR1                                                         | 9  | 1                      |
| 207 | IPR001509 | NAD-dependent epimerase/dehydratase                                              | 9  | 1                      |
| 208 | IPR013130 | Ferric reductase-like transmembrane component - N-terminal                       | 9  |                        |
| 209 | IPR006589 | Glycosyl hydrolase - family 13 - subfamily - catalytic region                    | 9  |                        |
| 210 | IPR001214 | SET                                                                              | 9  |                        |
| 211 | IPR010993 | Sterile alpha motif homology                                                     | 9  |                        |
| 212 | IPR000449 | Ubiquitin-associated/translation elongation factor EF1B - N-terminal             | 9  |                        |
| 213 | IPR000991 | Glutamine amidotransferase class-I                                               | 9  |                        |
| 214 | IPR009080 | Aminoacyl-tRNA synthetase - class 1a - anticodon-binding                         | 9  |                        |
| 215 | IPR000243 | Peptidase T1A - proteasome beta-subunit                                          | 9  | 1                      |
| 216 | IPR001844 | Chaperonin Cpn60                                                                 | 9  | 1                      |
| 217 | IPR000277 | Cys/Met metabolism - pyridoxal phosphate-dependent enzyme                        | 9  | 1                      |
| 218 | IPR002685 | Glycosyl transferase - family 15                                                 | 9  | 1                      |
| 219 | IPR000767 | Disease resistance protein                                                       | 9  |                        |
| 220 | IPR001270 | Chaperonin clpA/B                                                                | 8  | 1                      |
| 221 | IPR000583 | Glutamine amidotransferase - class-II                                            | 8  |                        |
| 222 | IPR006076 | FAD dependent oxidoreductase                                                     | 8  |                        |
| 223 | IPR001433 | Oxidoreductase FAD/NAD(P)-binding                                                | 8  |                        |
| 224 | IPR011616 | bZIP transcription factor - bZIP-1                                               | 8  |                        |
| 225 | IPR001494 | Importin-beta - N-terminal                                                       | 8  |                        |
| 226 | IPR015940 | Ubiquitin-associated/translation elongation factor EF1B - N-terminal - eukaryote | 8  |                        |
| 227 | IPR006662 | Thioredoxin-related                                                              | 8  |                        |
| 228 | IPR002130 | Peptidyl-prolyl cis-trans isomerase - cyclophilin-type                           | 8  |                        |
| 229 | IPR004154 | Anticodon-binding                                                                | 8  |                        |
| 230 | IPR002229 | Blood group Rhesus C/E and D polypeptide                                         | 8  | 1                      |
| 231 | IPR012998 | Glutamine amidotransferase - class I - active site                               | 8  |                        |
| 232 | IPR013121 | Ferric reductase - NAD binding                                                   | 8  |                        |
| 233 | IPR004853 | Protein of unknown function DUF250                                               | 8  |                        |
| 234 | IPR001709 | Flavoprotein pyridine nucleotide cytochrome reductase                            | 8  |                        |
| 235 | IPR004088 | K Homology - type 1                                                              | 8  |                        |
| 236 | IPR013112 | FAD-binding 8                                                                    | 8  |                        |
| 237 | IPR010625 | CHCH                                                                             | 8  |                        |
| 238 | IPR006402 | HAD-superfamily hydrolase - subfamily IA - variant 3                             | 8  |                        |
| 239 | IPR002942 | RNA-binding S4                                                                   | 8  |                        |
| 240 | IPR002952 | Eggshell protein                                                                 | 8  |                        |

|     |           |                                                                |   |   |
|-----|-----------|----------------------------------------------------------------|---|---|
| 241 | IPR002553 | Clathrin/coatome adaptor - adaptin-like - N-terminal           | 8 |   |
| 242 | IPR009071 | High mobility group box - HMG                                  | 8 |   |
| 243 | IPR006036 | TrkA potassium uptake protein                                  | 8 | 1 |
| 244 | IPR013120 | Male sterility C-terminal                                      | 8 |   |
| 245 | IPR000089 | Biotin/lipoyl attachment                                       | 8 |   |
| 246 | IPR011249 | Metalloenzyme - LuxS/M16 peptidase-like - metal-binding        | 8 |   |
| 247 | IPR010916 | TonB box - N-terminal                                          | 8 |   |
| 248 | IPR006046 | Glycoside hydrolase family 13                                  | 8 |   |
| 249 | IPR011040 | Neuraminidase                                                  | 8 |   |
| 250 | IPR011043 | Galactose oxidase/kelch - beta-propeller                       | 8 |   |
| 251 | IPR001019 | Guanine nucleotide binding protein (G-protein) - alpha subunit | 8 | 1 |
| 252 | IPR006047 | Glycosyl hydrolase - family 13 - catalytic region              | 8 |   |
| 253 | IPR001026 | Epsin - N-terminal                                             | 8 |   |
| 254 | IPR003656 | Zinc finger - BED-type predicted                               | 8 |   |
| 255 | IPR013809 | Epsin-like - N-terminal                                        | 8 |   |
| 256 | IPR000910 | High mobility group box - HMG1/HMG2                            | 8 |   |
| 257 | IPR010929 | CDR ABC transporter                                            | 8 |   |
| 258 | IPR000594 | UBA/THIF-type NAD/FAD binding fold                             | 8 |   |
| 259 | IPR002225 | 3-beta hydroxysteroid dehydrogenase/isomerase                  | 8 |   |
| 260 | IPR004365 | Nucleic acid binding - OB-fold - tRNA/helicase-type            | 8 |   |
| 261 | IPR001092 | Basic helix-loop-helix dimerisation region bHLH                | 8 |   |
| 262 | IPR011013 | Glycoside hydrolase-type carbohydrate-binding                  | 8 |   |
| 263 | IPR001932 | Protein phosphatase 2C-related                                 | 8 |   |
| 264 | IPR003107 | RNA-processing protein - HAT helix                             | 8 |   |
| 265 | IPR009038 | GOLD                                                           | 8 |   |
| 266 | IPR013057 | Amino acid transporter - transmembrane                         | 7 | 1 |
| 267 | IPR001208 | MCM                                                            | 7 | 1 |
| 268 | IPR006603 | Cystinosis/ERS1p repeat                                        | 7 |   |
| 269 | IPR007502 | Helicase-associated region                                     | 7 |   |
| 270 | IPR008254 | Flavodoxin/nitric oxide synthase                               | 7 |   |
| 271 | IPR000326 | Phosphatidic acid phosphatase type 2-like                      | 7 | 1 |
| 272 | IPR000648 | Oxysterol-binding protein                                      | 7 | 1 |
| 273 | IPR006034 | Asparaginase/glutaminase                                       | 7 | 1 |
| 274 | IPR011766 | Thiamine pyrophosphate enzyme - C-terminal TPP-binding         | 7 |   |
| 275 | IPR000348 | emp24/gp25L/p24                                                | 7 |   |
| 276 | IPR006140 | D-isomer specific 2-hydroxyacid dehydrogenase - NAD-binding    | 7 |   |
| 277 | IPR003608 | MIR                                                            | 7 |   |
| 278 | IPR006012 | Syntaxin/epimorphin coiled-coil                                | 7 |   |
| 279 | IPR000038 | Cell division/GTP binding protein                              | 7 | 1 |
| 280 | IPR000637 | HMG-I and HMG-Y - DNA-binding                                  | 7 |   |
| 281 | IPR009022 | Elongation factor G - III and V                                | 7 |   |
| 282 | IPR005024 | Snf7                                                           | 7 | 1 |
| 283 | IPR000480 | Glutelin                                                       | 7 |   |
| 284 | IPR001461 | Peptidase A1                                                   | 7 | 1 |
| 285 | IPR009078 | Ferritin/ribonucleotide reductase-like                         | 7 |   |
| 286 | IPR002860 | Glycoside hydrolase - BNR repeat                               | 7 |   |
| 287 | IPR000426 | Proteasome alpha-subunit                                       | 7 |   |
| 288 | IPR011051 | Cupin - RmC-type                                               | 7 |   |
| 289 | IPR005398 | Tubby - N-terminal                                             | 7 |   |
| 290 | IPR000108 | Neutrophil cytosol factor 2                                    | 7 |   |
| 291 | IPR002038 | Osteopontin                                                    | 7 | 1 |
| 292 | IPR001804 | Isocitrate/isopropylmalate dehydrogenase                       | 7 | 1 |
| 293 | IPR002109 | Glutaredoxin                                                   | 7 |   |
| 294 | IPR015413 | Aminoacyl-tRNA synthetase - class I (M)                        | 7 |   |
| 295 | IPR006596 | Nucleotide binding protein - PINc                              | 7 |   |
| 296 | IPR001926 | Pyridoxal phosphate-dependent enzyme - beta subunit            | 7 |   |
| 297 | IPR000086 | NUDIX hydrolase - core                                         | 7 |   |
| 298 | IPR002030 | Mitochondrial brown fat uncoupling protein                     | 7 | 1 |
| 299 | IPR001313 | Pumilio RNA-binding region                                     | 7 |   |
| 300 | IPR003903 | Ubiquitin interacting motif                                    | 7 |   |
| 301 | IPR001958 | Tetracycline resistance protein - TetA                         | 7 | 1 |
| 302 | IPR003892 | Ubiquitin system component Cue                                 | 7 |   |
| 303 | IPR011054 | Rudiment single hybrid motif                                   | 7 |   |
| 304 | IPR001594 | Zinc finger - DHHC-type                                        | 7 |   |
| 305 | IPR011765 | Peptidase M16 - N-terminal                                     | 7 |   |
| 306 | IPR012001 | Thiamine pyrophosphate enzyme - N-terminal TPP binding region  | 7 |   |
| 307 | IPR011047 | Quinonprotein alcohol dehydrogenase-like                       | 7 |   |
| 308 | IPR011709 | Region of unknown function DUF1605                             | 7 |   |
| 309 | IPR001012 | UBX                                                            | 7 |   |
| 310 | IPR000883 | Cytochrome c oxidase - subunit I                               | 7 | 1 |
| 311 | IPR005481 | Carbamoyl-phosphate synthetase large chain - N-terminal        | 7 |   |
| 312 | IPR001312 | Hexokinase                                                     | 7 | 1 |
| 313 | IPR014045 | Protein phosphatase 2C - N-terminal                            | 7 |   |
| 314 | IPR005819 | Histone H5                                                     | 7 | 1 |
| 315 | IPR001199 | Cytochrome b5                                                  | 7 |   |
| 316 | IPR000640 | Translation elongation factor EFG/EF2 - C-terminal             | 7 |   |
| 317 | IPR002123 | Phospholipid/glycerol acyltransferase                          | 7 |   |
| 318 | IPR002410 | Peptidase S33 - prolyl aminopeptidase                          | 7 | 1 |
| 319 | IPR007863 | Peptidase M16 - C-terminal                                     | 7 |   |
| 320 | IPR011060 | Ribulose-phosphate binding barrel                              | 7 |   |
| 321 | IPR015797 | NUDIX                                                          | 7 |   |
| 322 | IPR012000 | Thiamine pyrophosphate enzyme - central region                 | 7 |   |

|     |           |                                                                            |   |                       |
|-----|-----------|----------------------------------------------------------------------------|---|-----------------------|
| 323 | IPR003029 | S1 - RNA binding                                                           | 7 |                       |
| 324 | IPR003395 | SMC protein - N-terminal                                                   | 7 |                       |
| 325 | IPR004014 | ATPase - P-type cation-transporter - N-terminal                            | 7 |                       |
| 326 | IPR011072 | HR1 rho-binding repeat                                                     | 6 |                       |
| 327 | IPR007696 | MutS III                                                                   | 6 |                       |
| 328 | IPR006594 | LisH dimerisation motif                                                    | 6 |                       |
| 329 | IPR014400 | Cyclin - A/B/D/E                                                           | 6 | 1                     |
| 330 | IPR008937 | Ras guanine nucleotide exchange factor                                     | 6 |                       |
| 331 | IPR001221 | Phenol hydroxylase reductase                                               | 6 |                       |
| 332 | IPR007109 | Brix                                                                       | 6 |                       |
| 333 | IPR006011 | Syntaxin - N-terminal                                                      | 6 |                       |
| 334 | IPR005937 | 26S proteasome subunit P45                                                 | 6 | 1                     |
| 335 | IPR003890 | MIF4G-like - type 3                                                        | 6 |                       |
| 336 | IPR006085 | XPG N-terminal                                                             | 6 |                       |
| 337 | IPR008971 | HSP40/DnaJ peptide-binding                                                 | 6 |                       |
| 338 | IPR010996 | DNA polymerase beta - N-terminal-like                                      | 6 |                       |
| 339 | IPR000994 | Peptidase M24 - catalytic core                                             | 6 |                       |
| 340 | IPR003089 | Alpha/beta hydrolase                                                       | 6 |                       |
| 341 | IPR001982 | Homing endonuclease - LAGLIDADG/HNH                                        | 6 |                       |
| 342 | IPR004046 | Glutathione S-transferase - C-terminal                                     | 6 |                       |
| 343 | IPR001164 | Arf GTPase activating protein                                              | 6 | 1                     |
| 344 | IPR000815 | Mercuric reductase                                                         | 6 | 1                     |
| 345 | IPR004038 | Ribosomal protein L7Ae/L30e/S12e/Gadd45                                    | 6 |                       |
| 346 | IPR001419 | HMW glutenin                                                               | 6 | 1                     |
| 347 | IPR001251 | Cellular retinaldehyde-binding/triple function - C-terminal                | 6 |                       |
| 348 | IPR000306 | Zinc finger - FYVE-type                                                    | 6 |                       |
| 349 | IPR000891 | Pyruvate carboxyltransferase                                               | 6 |                       |
| 350 | IPR013968 | KR                                                                         | 6 |                       |
| 351 | IPR002125 | CMP/dCMP deaminase - zinc-binding                                          | 6 |                       |
| 352 | IPR006204 | GHMP kinase                                                                | 6 |                       |
| 353 | IPR001834 | NADH:cytochrome b5 reductase (CBR)                                         | 6 | 1                     |
| 354 | IPR011335 | Restriction endonuclease - type II-like - core                             | 6 |                       |
| 355 | IPR011498 | Kelch repeat type 2                                                        | 6 |                       |
| 356 | IPR000340 | Protein-tyrosine phosphatase - dual specificity                            | 6 |                       |
| 357 | IPR004820 | Cytidyltransferase                                                         | 6 |                       |
| 358 | IPR002078 | RNA polymerase sigma factor 54 - interaction                               | 6 |                       |
| 359 | IPR003010 | Nitrilase/cyanide hydratase and apolipoprotein N-acyltransferase           | 6 |                       |
| 360 | IPR004364 | Aminoacyl-tRNA synthetase - class II (D - K and N)                         | 6 |                       |
| 361 | IPR004182 | GRAM                                                                       | 6 |                       |
| 362 | IPR000560 | Histidine acid phosphatase                                                 | 6 | 1                     |
| 363 | IPR008333 | Oxidoreductase FAD-binding region                                          | 6 |                       |
| 364 | IPR011658 | PA14                                                                       | 6 |                       |
| 365 | IPR001752 | Kinesin - motor region                                                     | 6 |                       |
| 366 | IPR011702 | Glutamine amidotransferase superfamily                                     | 6 |                       |
| 367 | IPR003342 | Glycosyl transferase - family 39                                           | 6 |                       |
| 368 | IPR008273 | Cellular retinaldehyde-binding/triple function - N-terminal                | 6 |                       |
| 369 | IPR000219 | DH                                                                         | 6 |                       |
| 370 | IPR009020 | Proteinase inhibitor - propeptide                                          | 6 |                       |
| 371 | IPR001345 | Phosphoglycerate/bisphosphoglycerate mutase                                | 6 |                       |
| 372 | IPR006581 | VPS10                                                                      | 6 |                       |
| 373 | IPR002375 | Purine/pyrimidine phosphoribosyl transferase                               | 6 |                       |
| 374 | IPR000261 | EPS15 homology (EH)                                                        | 6 |                       |
| 375 | IPR000408 | Regulator of chromosome condensation - RCC1                                | 6 |                       |
| 376 | IPR001401 | Dynammin - GTPase region                                                   | 6 |                       |
| 377 | IPR001247 | Exoribonuclease - phosphorolytic domain 1                                  | 6 |                       |
| 378 | IPR004367 | Cyclin - C-terminal                                                        | 6 |                       |
| 379 | IPR006086 | XPG I                                                                      | 6 |                       |
| 380 | IPR000245 | ATPase - V0 complex - proteolipid subunit C -                              | 6 | 1                     |
| 381 | IPR006652 | Kelch repeat type 1                                                        | 6 |                       |
| 382 | IPR011700 | Basic leucine zipper                                                       | 6 |                       |
| 383 | IPR000432 | DNA mismatch repair protein MutS - C-terminal                              | 6 |                       |
| 384 | IPR009001 | Translation elongation factor EF1A/initiation factor IF2gamma - C-terminal | 6 |                       |
| 385 | IPR000047 | Helix-turn-helix motif - lambda-like repressor                             | 6 |                       |
| 386 | IPR003958 | Transcription factor CBF/NF-Y/archaeal histone                             | 6 |                       |
| 387 | IPR000804 | Clathrin adaptor - sigma subunit/coatomer - zeta subunit                   | 6 | 1                     |
| 388 | IPR008162 | Inorganic pyrophosphatase                                                  | 6 | 1                     |
| 389 | IPR002312 | Aspartyl-tRNA synthetase - class IIb                                       | 6 |                       |
| 390 | IPR008948 | L-Aspartase-like                                                           | 6 |                       |
| 391 | IPR000960 | Flavin-containing monooxygenase FMO                                        | 6 | 1                     |
| 392 | IPR013750 | GHMP kinase - C-terminal                                                   | 6 |                       |
| 393 | IPR002478 | PUA                                                                        | 6 | with ≥6<br>80 members |
| 394 | IPR004299 | Membrane bound O-acyl transferase - MBOAT                                  | 5 | 1                     |
| 395 | IPR001093 | IMP dehydrogenase/GMP reductase                                            | 5 | 1                     |
| 396 | IPR004217 | Zinc finger - Tim10/DDP-type                                               | 5 | 1                     |
| 397 | IPR004886 | Glycolipid anchored surface protein GAS1                                   | 5 | 1                     |
| 398 | IPR000286 | Histone deacetylase superfamily                                            | 5 | 1                     |
| 399 | IPR005482 | Biotin carboxylase - C-terminal                                            | 5 |                       |
| 400 | IPR002424 | Insect alcohol dehydrogenase family                                        | 5 | 1                     |
| 401 | IPR006069 | ATPase - P-type cation exchange - alpha subunit                            | 5 | 1                     |
| 402 | IPR005556 | SUN                                                                        | 5 | 1                     |
| 403 | IPR006896 | Sec23/Sec24 trunk region                                                   | 5 |                       |

|     |           |                                                                         |   |   |
|-----|-----------|-------------------------------------------------------------------------|---|---|
| 404 | IPR011006 | CheY-like                                                               | 5 |   |
| 405 | IPR003591 | Leucine-rich repeat - typical subtype                                   | 5 |   |
| 406 | IPR002013 | Synaptojanin - N-terminal                                               | 5 |   |
| 407 | IPR000467 | D111/G-patch                                                            | 5 |   |
| 408 | IPR002052 | N-6 Adenine-specific DNA methylase                                      | 5 |   |
| 409 | IPR001553 | RecA bacterial DNA recombination                                        | 5 | 1 |
| 410 | IPR000591 | Pleckstrin/ G-protein - interacting region                              | 5 |   |
| 411 | IPR002524 | Cation efflux protein                                                   | 5 | 1 |
| 412 | IPR000380 | DNA topoisomerase - type IA - core                                      | 5 |   |
| 413 | IPR008351 | JNK MAP kinase                                                          | 5 | 1 |
| 414 | IPR006121 | Heavy metal transport/detoxification protein                            | 5 |   |
| 415 | IPR008978 | HSP20-like chaperone                                                    | 5 |   |
| 416 | IPR003689 | Zinc/iron permease                                                      | 5 | 1 |
| 417 | IPR005517 | Translation elongation factor EFG/EF2 - domain IV                       | 5 |   |
| 418 | IPR004045 | Glutathione S-transferase - N-terminal                                  | 5 |   |
| 419 | IPR000695 | H+ transporting ATPase - proton pump                                    | 5 | 1 |
| 420 | IPR000651 | Guanine nucleotide exchange factor for Ras-like GTPases - N-terminal    | 5 |   |
| 421 | IPR008968 | Clathrin adaptor - mu subunit - C-terminal                              | 5 |   |
| 422 | IPR000425 | Major intrinsic protein                                                 | 5 | 1 |
| 423 | IPR006597 | Sel1-like                                                               | 5 |   |
| 424 | IPR001813 | Ribosomal protein 60S                                                   | 5 | 1 |
| 425 | IPR000941 | Enolase                                                                 | 5 | 1 |
| 426 | IPR000793 | ATPase - F1/V1/A1 complex - alpha/beta subunit - C-terminal             | 5 |   |
| 427 | IPR001046 | Natural resistance-associated macrophage protein                        | 5 | 1 |
| 428 | IPR006084 | DNA repair protein (XPGC)/yeast Rad                                     | 5 |   |
| 429 | IPR001305 | DnaJ central region                                                     | 5 |   |
| 430 | IPR003000 | Silent information regulator protein Sir2                               | 5 | 1 |
| 431 | IPR003034 | DNA-binding SAP                                                         | 5 |   |
| 432 | IPR001222 | Zinc finger - TFIIIS-type                                               | 5 |   |
| 433 | IPR002016 | Haem peroxidase - plant/fungal/bacterial                                | 5 | 1 |
| 434 | IPR011038 | Calycin-like                                                            | 5 |   |
| 435 | IPR003607 | Metal-dependent phosphohydrolase - HD region                            | 5 |   |
| 436 | IPR009002 | FMN-binding split barrel - related                                      | 5 |   |
| 437 | IPR000672 | Tetrahydrofolate dehydrogenase/cyclohydrolase                           | 5 |   |
| 438 | IPR005483 | Carbamoyl-phosphate synthetase large chain                              | 5 |   |
| 439 | IPR006575 | RWD                                                                     | 5 |   |
| 440 | IPR011048 | Cytochrome cd1-nitrite reductase-like - C-terminal haem d1              | 5 |   |
| 441 | IPR003347 | Transcription factor jumonji/aspartyl beta-hydroxylase                  | 5 |   |
| 442 | IPR008972 | Cupredoxin                                                              | 5 |   |
| 443 | IPR006068 | ATPase - P-type cation-transporter - C-terminal                         | 5 |   |
| 444 | IPR008918 | Helix-hairpin-helix motif - class 2                                     | 5 |   |
| 445 | IPR002939 | Chaperone DnaJ - C-terminal                                             | 5 |   |
| 446 | IPR001373 | Cullin                                                                  | 5 |   |
| 447 | IPR001715 | Calponin-like actin-binding                                             | 5 |   |
| 448 | IPR007484 | Peptidase M28                                                           | 5 |   |
| 449 | IPR001317 | Carbamoyl-phosphate synthase - GATase region                            | 5 |   |
| 450 | IPR014025 | Glutaredoxin subgroup                                                   | 5 |   |
| 451 | IPR001388 | Synaptobrevin                                                           | 5 |   |
| 452 | IPR000904 | SEC7-like                                                               | 5 |   |
| 453 | IPR000462 | CDP-alcohol phosphatidyltransferase                                     | 5 | 1 |
| 454 | IPR003613 | U box                                                                   | 5 |   |
| 455 | IPR013720 | LisH dimerisation motif - subgroup                                      | 5 |   |
| 456 | IPR007860 | MutS II                                                                 | 5 |   |
| 457 | IPR007526 | SWIRM                                                                   | 5 |   |
| 458 | IPR001310 | Histidine triad (HIT) protein                                           | 5 | 1 |
| 459 | IPR000232 | Heat shock factor (HSF)-type - DNA-binding                              | 5 |   |
| 460 | IPR006172 | DNA-directed DNA polymerase B                                           | 5 | 1 |
| 461 | IPR012110 | Pyruvate decarboxylase/indolepyruvate decarboxylase                     | 5 | 1 |
| 462 | IPR006055 | Exonuclease                                                             | 5 |   |
| 463 | IPR013520 | Exonuclease - RNase T and DNA polymerase III                            | 5 |   |
| 464 | IPR009050 | Globin-like                                                             | 5 |   |
| 465 | IPR011074 | Phosphatidylinositol transfer protein-like - N-terminal                 | 5 |   |
| 466 | IPR000222 | Protein phosphatase 2C - manganese/magnesium aspartate binding site     | 5 |   |
| 467 | IPR008957 | Fibronectin - type III-like fold                                        | 5 |   |
| 468 | IPR013749 | Phosphomethylpyrimidine kinase type-1                                   | 5 |   |
| 469 | IPR004861 | Protein-tyrosine phosphatase - SIW14-like                               | 5 | 1 |
| 470 | IPR005946 | Ribose-phosphate pyrophosphokinase                                      | 5 | 1 |
| 471 | IPR015847 | Exoribonuclease - phosphorolytic domain 2                               | 5 |   |
| 472 | IPR010482 | Integral peroxisomal membrane peroxin                                   | 5 | 1 |
| 473 | IPR009079 | Four-helical cytokine-like - core                                       | 5 |   |
| 474 | IPR000866 | Alkyl hydroperoxide reductase/ Thiol specific antioxidant/ Mal allergen | 5 |   |
| 475 | IPR000095 | PAK-box/P21-Rho-binding                                                 | 5 |   |
| 476 | IPR003152 | PIK-related kinase - FATC                                               | 5 |   |
| 477 | IPR001431 | Peptidase M16 - zinc-binding site                                       | 5 |   |
| 478 | IPR006539 | Phospholipid-translocating P-type ATPase - flippase                     | 5 | 1 |
| 479 | IPR013740 | Redoxin                                                                 | 5 |   |
| 480 | IPR015947 | PUA-like                                                                | 5 |   |
| 481 | IPR010997 | HRDC-like                                                               | 5 |   |
| 482 | IPR002523 | Mg2+ transporter protein - CorA-like                                    | 5 | 1 |
| 483 | IPR000569 | HECT                                                                    | 5 |   |
| 484 | IPR001463 | Sodium:alanine symporter                                                | 5 | 1 |
| 485 | IPR004550 | L-asparaginase - type II                                                | 5 | 1 |



|     |           |                                                                 |   |             |
|-----|-----------|-----------------------------------------------------------------|---|-------------|
| 486 | IPR000399 | TPP-binding enzymes                                             | 5 |             |
| 487 | IPR001882 | Biotin-binding site                                             | 5 |             |
| 488 | IPR001609 | Myosin head - motor region                                      | 5 |             |
| 489 | IPR008930 | Terpenoid cyclases/protein prenyltransferase alpha-alpha toroid | 5 |             |
| 490 | IPR000850 | Adenylate kinase                                                | 5 | 1           |
| 491 | IPR004160 | Translation elongation factor EFTu/EF1A - C-terminal            | 5 |             |
| 492 | IPR000842 | Phosphoribosyl pyrophosphate synthetase                         | 5 |             |
| 493 | IPR001025 | Bromo adjacent region                                           | 5 |             |
| 494 | IPR000223 | Peptidase S26A - signal peptidase I                             | 5 | 1           |
| 495 | IPR002129 | Pyridoxal phosphate-dependent decarboxylase                     | 5 | 1           |
| 496 | IPR000209 | Peptidase S8 and S53 - subtilisin - kexin - sedolisin           | 5 |             |
| 497 | IPR004274 | NLI interacting factor                                          | 5 |             |
| 498 | IPR000225 | Armadillo                                                       | 5 | with ≥5     |
| 499 | IPR015415 | Vps4 oligomerisation - C-terminal                               | 4 | 113 members |
| 500 | IPR003877 | SPla/Ryanodine receptor SPRY                                    | 4 |             |

**Supplementary Table 2.** Enrichment for deletions in the lineage leading to the ABC16-monsters.

The observed mean deletion number in each of Moflo-sorted samples is shown in green when it is larger than the expected number for the corresponding unsorted sample.

Deleted genes in *MATa* strains are highlighted with blue; deleted genes in *MATα* strains are highlighted with pink.

The same cross identification numbers are used in **Supplementary Fig. 2** online.

| Cross | Deleted Genes in Parental Strain(s) 1                                                                                                                                       | Deleted Genes in Parental Strain(s) 2                                                                                              | Deleted Genes in Selected Progeny Strain                                                                                                                                                     | Expected average deletion number for unsorted progeny | Observed average deletion number for genotyped sorted progeny | Standard error of the mean | Number of genotyped colonies |
|-------|-----------------------------------------------------------------------------------------------------------------------------------------------------------------------------|------------------------------------------------------------------------------------------------------------------------------------|----------------------------------------------------------------------------------------------------------------------------------------------------------------------------------------------|-------------------------------------------------------|---------------------------------------------------------------|----------------------------|------------------------------|
| 1     | ADP1 YBT1 in one strain<br>YOR1 YNR070W in one strain<br>PDR11 YBT1 in one strain (three strains pooled)                                                                    | YOL075C PDR12 in one strain<br>ADP1 NFT1 in one strain<br>NFT1 BPT1 in one strain<br>SNQ2 BPT1 in one strain (four strains pooled) | ADP1 NFT1 BPT1 YBT1                                                                                                                                                                          | 2                                                     | 3.7                                                           | 0.3                        | 3                            |
| 2     | VMR1                                                                                                                                                                        | PDR15 PDR5                                                                                                                         | PDR15 VMR1                                                                                                                                                                                   | 1.5                                                   | 2.5                                                           | 0.5                        | 2                            |
| 3     | ADP1 PDR12                                                                                                                                                                  | AUS1 PDR5                                                                                                                          | ADP1 AUS1 PDR5 PDR12                                                                                                                                                                         | 2                                                     | 3.25                                                          | 0.5                        | 4                            |
| 4     | PDR15 PDR10                                                                                                                                                                 | ADP1 PDR12                                                                                                                         | ADP1 PDR15 PDR10                                                                                                                                                                             | 2                                                     | 3                                                             | N/A                        | 1                            |
| 5     | YOR1 YNR070W                                                                                                                                                                | SNQ2 PDR11 BPT1 YBT1                                                                                                               | SNQ2 YOR1 PDR11 YNR070W                                                                                                                                                                      | 3                                                     | 3.5                                                           | 0.2                        | 6                            |
| 6     | YOL075C PDR12 in one strain (five strains pooled)<br>ADP1 NFT1 in one strain<br>NFT1 BPT1 in one strain<br>SNQ2 BPT1 in one strain<br>SNQ2 YBT1 YOL075C PDR12 in one strain | ADP1 YBT1 in one strain<br>YOR1 YNR070W in one strain<br>PDR11 YBT1 in one strain (three strains pooled)                           | ADP1 SNQ2 YBT1 YOL075C PDR12                                                                                                                                                                 | 2.2                                                   | 3.2                                                           | 0.3                        | 14                           |
| 7     | PDR15 VMR1                                                                                                                                                                  | ADP1 PDR11 NFT1 YBT1                                                                                                               | VMR1 PDR11 NFT1 YBT1                                                                                                                                                                         | 3                                                     | 3                                                             | 1                          | 2                            |
| 8     | ADP1 AUS1 PDR5 PDR12                                                                                                                                                        | ADP1 PDR15 PDR10                                                                                                                   | ADP1 PDR15 AUS1 PDR5 PDR10 PDR12                                                                                                                                                             | 3.5                                                   | 5.5                                                           | 0.5                        | 2                            |
| 9     | ADP1 SNQ2 YBT1 YOL075C PDR12                                                                                                                                                | ADP1 NFT1 BPT1 YBT1                                                                                                                | ADP1 SNQ2 NFT1 BPT1 YBT1 YOL075C PDR12                                                                                                                                                       | 4.5                                                   | 5.6                                                           | 0.6                        | 5                            |
| 10    | VMR1 PDR11 NFT1 YBT1                                                                                                                                                        | ADP1 PDR15 AUS1 PDR5 PDR10 PDR12                                                                                                   | ADP1 PDR11 NFT1 YBT1 AUS1 PDR10 PDR12<br>ADP1 PDR15 PDR11 NFT1 YBT1 PDR5 PDR10<br>ADP1 PDR15 VMR1 PDR11 PDR10 PDR12<br>ADP1 VMR1 PDR11 YBT1 AUS1 PDR5 PDR10                                  | 5                                                     | 5.4                                                           | 0.3                        | 14                           |
| 11    | SNQ2 YOR1 PDR11 YNR070W                                                                                                                                                     | ADP1 SNQ2 NFT1 BPT1 YBT1 YOL075C PDR12                                                                                             | ADP1 SNQ2 PDR11 NFT1 BPT1 YBT1 YNR070W YOL075C<br>ADP1 SNQ2 YOR1 PDR11 NFT1 BPT1 YBT1 YNR070W PDR12                                                                                          | 5.5                                                   | 7.4                                                           | 0.5                        | 10                           |
| 12    | ADP1 PDR11 NFT1 YBT1 AUS1 PDR10 PDR12                                                                                                                                       | ADP1 PDR15 PDR11 NFT1 YBT1 PDR5 PDR10                                                                                              | ADP1 PDR15 PDR11 NFT1 YBT1 AUS1 PDR5 PDR10 PDR12                                                                                                                                             | 7                                                     | 6.9                                                           | 0.3                        | 14                           |
| 13    | ADP1 PDR15 VMR1 PDR11 PDR10 PDR12                                                                                                                                           | ADP1 VMR1 PDR11 YBT1 AUS1 PDR5 PDR10                                                                                               | ADP1 PDR15 VMR1 PDR11 AUS1 PDR5 PDR10 PDR12                                                                                                                                                  | 6.5                                                   | 6.8                                                           | 0.2                        | 13                           |
| 14    | ADP1 SNQ2 PDR11 NFT1 BPT1 YBT1 YNR070W<br>YOL075C                                                                                                                           | ADP1 SNQ2 YOR1 PDR11 NFT1 BPT1 YBT1 YNR070W<br>PDR12                                                                               | ADP1 SNQ2 YOR1 PDR11 NFT1 BPT1 YBT1 YNR070W YOL075C<br>PDR12                                                                                                                                 | 8.5                                                   | 8.75                                                          | 0.9                        | 4                            |
| 15    | ADP1 SNQ2 YOR1 PDR11 NFT1 BPT1 YBT1 YNR070W<br>YOL075C PDR12                                                                                                                | ADP1 YCF1 NFT1 YBT1 YOL075C                                                                                                        | ADP1 YCF1 NFT1 BPT1 YBT1 YNR070W YOL075C PDR12                                                                                                                                               | 7.5                                                   | 7.7                                                           | 0.5                        | 9                            |
| 16    | ADP1 SNQ2 YOR1 PDR11 NFT1 BPT1 YBT1 YNR070W<br>YOL075C PDR12                                                                                                                | ADP1 PDR15 PDR11 NFT1 YBT1 AUS1 PDR5 PDR10<br>PDR12                                                                                | ADP1 SNQ2 PDR15 YOR1 PDR11 NFT1 YBT1 YOL075C AUS1<br>PDR5 PDR10 PDR12                                                                                                                        | 9.5                                                   | 10.6                                                          | 0.3                        | 16                           |
| 17    | ADP1 SNQ2 YOR1 PDR11 NFT1 BPT1 YBT1 YNR070W<br>YOL075C PDR12                                                                                                                | ADP1 PDR15 VMR1 PDR11 AUS1 PDR5 PDR10 PDR12                                                                                        | ADP1 PDR15 VMR1 PDR11 NFT1 BPT1 YBT1 YNR070W AUS1<br>PDR5 PDR10 PDR12                                                                                                                        | 8.5                                                   | 9.9                                                           | 0.3                        | 14                           |
| 18    | ADP1 SNQ2 PDR15 YOR1 PDR11 NFT1 YBT1 YOL075C<br>AUS1 PDR5 PDR10 PDR12                                                                                                       | ADP1 PDR15 PDR11 PDR11 NFT1 BPT1 YBT1 YNR070W<br>AUS1 PDR5 PDR10 PDR12                                                             | ADP1 SNQ2 PDR15 YOR1 PDR11 NFT1 BPT1 YBT1 YNR070W<br>YOL075C AUS1 PDR5 PDR10 PDR12<br>ADP1 PDR15 YOR1 VMR1 PDR11 NFT1 BPT1 YBT1 YNR070W<br>YOL075C AUS1 PDR5 PDR10 PDR12                     | 12                                                    | 11.7                                                          | 0.3                        | 16                           |
| 19    | ADP1 YCF1 NFT1 BPT1 YBT1 YNR070W YOL075C<br>PDR12                                                                                                                           | ADP1 PDR15 YOR1 VMR1 PDR11 NFT1 BPT1 YBT1<br>YNR070W YOL075C AUS1 PDR5 PDR10 PDR12                                                 | ADP1 YCF1 YOR1 VMR1 NFT1 BPT1 YBT1 YNR070W YOL075C<br>AUS1 PDR5 PDR10 PDR12                                                                                                                  | 11                                                    | 11.7                                                          | 0.2                        | 24                           |
| 20    | ADP1 SNQ2 PDR15 VMR1 PDR11 NFT1 BPT1 YBT1<br>YNR070W YOL075C AUS1 PDR5 PDR10 PDR12                                                                                          | ADP1 PDR15 YOR1 VMR1 PDR11 NFT1 BPT1 YBT1<br>YNR070W YOL075C AUS1 PDR5 PDR10 PDR12                                                 | ADP1 SNQ2 PDR15 YOR1 VMR1 PDR11 NFT1 BPT1 YBT1<br>YNR070W YOL075C AUS1 PDR5 PDR10 PDR12                                                                                                      | 14                                                    | 13.8                                                          | 0.2                        | 12                           |
| 21    | ADP1 YCF1 YOR1 VMR1 NFT1 BPT1 YBT1 YNR070W<br>YOL075C AUS1 PDR5 PDR10 PDR12                                                                                                 | ADP1 SNQ2 PDR15 VMR1 PDR11 NFT1 BPT1 YBT1<br>YNR070W YOL075C AUS1 PDR5 PDR10 PDR12                                                 | ADP1 YCF1 PDR15 YOR1 VMR1 PDR11 NFT1 BPT1 YBT1<br>YNR070W YOL075C AUS1 PDR5 PDR10 PDR12                                                                                                      | 13.5                                                  | 13.4                                                          | 0.3                        | 12                           |
| 22    | ADP1 YCF1 PDR15 YOR1 VMR1 PDR11 NFT1 BPT1<br>YBT1 YNR070W YOL075C AUS1 PDR5 PDR10 PDR12                                                                                     | ADP1 SNQ2 PDR15 YOR1 VMR1 PDR11 NFT1 BPT1<br>YBT1 YNR070W YOL075C AUS1 PDR5 PDR10 PDR12                                            | ADP1 SNQ2 YCF1 PDR15 YOR1 VMR1 PDR11 NFT1 BPT1 YBT1<br>YNR070W YOL075C AUS1 PDR5 PDR10 PDR12<br>ADP1 SNQ2 YCF1 PDR15 YOR1 VMR1 PDR11 NFT1 BPT1 YBT1<br>YNR070W YOL075C AUS1 PDR5 PDR10 PDR12 | 15                                                    | No sorting used                                               | N/A                        | 24                           |

**Supplementary Table 3. Growth of ABC<sub>16</sub>-monsters in the presence of the inducer doxycycline.**

For assessing the toxicity of GFP to cells, OD<sub>600</sub> of the cultures of GFP-induced cells and non-GFP-induced cells were measured over time. The cultures of GFP-induced cells were started from overnight cultures of already induced cells. The cultures of non-induced cells were never exposed to doxycycline. Non-mutant is a GMtoolkit-alpha strain not carrying any GFP cassette. *ho* ProMonster carries one GFP cassette in the *ho* deletion locus. Two ABC<sub>16</sub>-monster strains are *MAT*alpha strains. The presence or absence of GFP expression was confirmed under the microscope.

| Strain and induction condition           | Time in minutes |      |      |      |      |      |      |      |      |      |      |      |
|------------------------------------------|-----------------|------|------|------|------|------|------|------|------|------|------|------|
|                                          | 0               | 80   | 127  | 187  | 252  | 312  | 372  | 432  | 492  | 622  | 662  | 732  |
| Non-mutant                               | 0.08            | 0.14 | 0.20 | 0.36 | 0.65 | 1.17 | 1.63 | 2.57 | 3.99 | 5.88 | 5.86 | 5.94 |
| <i>ho</i> ProMonster                     | 0.09            | 0.15 | 0.21 | 0.41 | 0.74 | 1.28 | 1.83 | 2.95 | 4.56 | 5.80 | 5.82 | 6.52 |
| ABC <sub>16</sub> -Monster (RY0568)      | 0.14            | 0.26 | 0.37 | 0.63 | 1.11 | 1.75 | 2.34 | 3.64 | 5.02 | 6.06 | 6.06 | 6.32 |
| ABC <sub>16</sub> -Monster (RY0623)      | 0.12            | 0.23 | 0.34 | 0.56 | 0.95 | 1.54 | 2.09 | 3.37 | 4.87 | 6.00 | 5.98 | 6.24 |
| Non-mutant, dox                          | 0.08            | 0.14 | 0.19 | 0.36 | 0.65 | 1.11 | 1.60 | 2.61 | 3.80 | 5.78 | 5.90 | 6.02 |
| <i>ho</i> ProMonster, dox                | 0.07            | 0.13 | 0.18 | 0.34 | 0.61 | 1.08 | 1.55 | 2.50 | 3.60 | 5.66 | 5.72 | 5.90 |
| ABC <sub>16</sub> -Monster (RY0568), dox | 0.06            | 0.13 | 0.17 | 0.30 | 0.53 | 0.84 | 1.21 | 1.85 | 2.94 | 5.32 | 5.78 | 5.84 |
| ABC <sub>16</sub> -Monster (RY0623), dox | 0.08            | 0.16 | 0.22 | 0.39 | 0.66 | 1.04 | 1.48 | 2.40 | 3.37 | 5.76 | 5.80 | 5.86 |

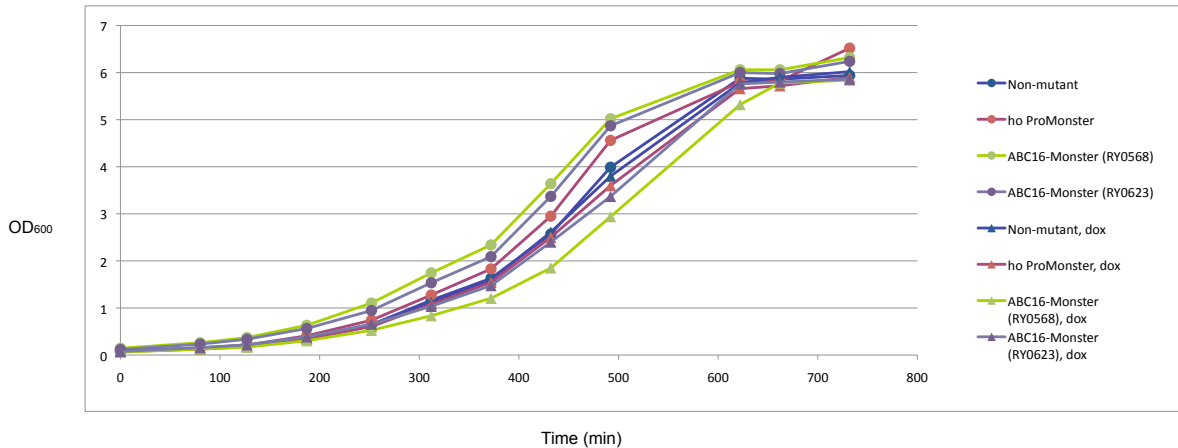

| Strain and induction condition           | log <sub>2</sub> (OD <sub>600</sub> ) Values |       |       |       |       |       | Exponential growth rate | Dox effect (induced/uninduced) |
|------------------------------------------|----------------------------------------------|-------|-------|-------|-------|-------|-------------------------|--------------------------------|
|                                          | 0                                            | 80    | 127   | 187   | 252   | 312   |                         |                                |
| Non-mutant                               | -3.68                                        | -2.86 | -2.32 | -1.48 | -0.63 | 0.22  | 0.013                   | 1.0                            |
| <i>ho</i> ProMonster                     | -3.41                                        | -2.70 | -2.22 | -1.29 | -0.43 | 0.35  | 0.013                   | 1.0                            |
| ABC <sub>16</sub> -Monster (RY0568)      | -2.80                                        | -1.93 | -1.43 | -0.66 | 0.14  | 0.80  | 0.012                   | 1.0                            |
| ABC <sub>16</sub> -Monster (RY0623)      | -3.08                                        | -2.11 | -1.57 | -0.83 | -0.08 | 0.62  | 0.012                   | 1.0                            |
| Non-mutant, dox                          | -3.64                                        | -2.88 | -2.37 | -1.46 | -0.62 | 0.15  | 0.013                   |                                |
| <i>ho</i> ProMonster, dox                | -3.84                                        | -2.99 | -2.51 | -1.55 | -0.72 | 0.10  | 0.014                   |                                |
| ABC <sub>16</sub> -Monster (RY0568), dox | -4.01                                        | -2.99 | -2.57 | -1.72 | -0.93 | -0.26 | 0.012                   |                                |
| ABC <sub>16</sub> -Monster (RY0623), dox | -3.72                                        | -2.68 | -2.21 | -1.37 | -0.61 | 0.05  | 0.012                   |                                |

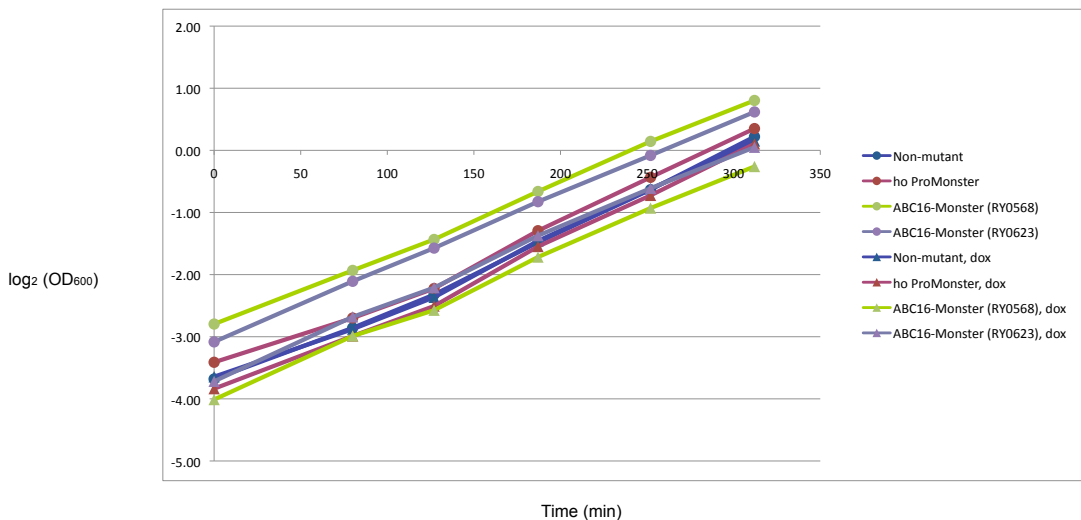

**Supplementary Table 4. Deletion numbers of strains during a Green Monster process with six loci.**

Average deletion number and standard deviation are shown.

Sorted and unsorted strains were isolated and genotyped.

Genotyped strains were used in crosses in each round.

**First round**

Cross of yer042wDelta and ycl033cDelta

Sorted 2 ± 0

Unsorted 1.5 ± 0.5

Cross of ydl227cDelta and ydl242wDelta

Sorted 1.5 ± 0.5

Unsorted 0.8 ± 0.4

Cross of ykl069wDelta and yol118cDelta

Sorted 2 ± 0

Unsorted 1.1 ± 0.7

**Second round**

Cross of yer042wDelta ycl033cDelta and ydl227cDelta ydl242wDelta

Sorted 3.5 ± 0.5

Unsorted ND

Cross of yer042wDelta ycl033cDelta and ykl069wDelta yol118cDelta

Sorted 3.5 ± 0.7

Unsorted ND

**Third round**

Cross of yer042wDelta ycl033cDelta ydl227cDelta ydl242wDelta and yer042wDelta ycl033cDelta ykl069wDelta and yol118cDelta

Sorted 5.1 ± 1.1 4 out of 8 strains were 6-GFP strains.

Unsorted 3.3 ± 0.8

**Supplementary Table 5.** Composition of populations from the *en masse* Green Monster processes.

We note that two haploid-selected and induced samples in Round 4 contained many diploids, but these cells were eliminated by sorting, due to our focus on smaller cells ('events' with small forward scatter) originally designed to avoid cell aggregates.

\*: These are cells that are resistant to both G418 (due to *KanMX4* in *GMToolkit-a*) and neuceothricin (due to *NatMX4* in *GMToolkit-α*) and are assumed to be diploids.

When 29 sorted cells from Round 3 that contained a deletion in *YBT1* were tested for the presence of the wild-type copy using PCR, none contained the wild-type *YBT1* sequence, indicating that these are haploids with only one chromosome for this locus.

ND: not determined due to test plate contamination.

| Round | Sample                                  | Series 1                |    | Series 2                |     | Series 3                |     |
|-------|-----------------------------------------|-------------------------|----|-------------------------|-----|-------------------------|-----|
|       |                                         | Percentage of diploids* | n  | Percentage of diploids* | n   | Percentage of diploids* | n   |
| 0     | Mated                                   | 14%                     | 29 | 69%                     | 13  | 28%                     | 18  |
|       | Diploid-selected                        | 100%                    | 22 | 100%                    | 17  | 100%                    | 16  |
|       | Haploid-selected and induced (unsorted) | 8%                      | 24 | 0%                      | 24  | 0%                      | 24  |
| 1     | Sorted                                  | 13%                     | 24 | 4%                      | 24  | 0%                      | 24  |
|       | Mated                                   | ND                      |    | ND                      |     | ND                      |     |
|       | Diploid-selected                        | 100%                    | 7  | 100%                    | 15  | 100%                    | 13  |
|       | Haploid-selected and induced (unsorted) | 13%                     | 24 | 0%                      | 24  | 0%                      | 24  |
| 2     | Sorted                                  | 4%                      | 24 | 0%                      | 24  | 0%                      | 24  |
|       | Mated                                   | 18%                     | 22 | 28%                     | 40  | 26%                     | 31  |
|       | Diploid-selected                        | 100%                    | 30 | 100%                    | 15  | 100%                    | 21  |
|       | Haploid-selected and induced (unsorted) | 0%                      | 24 | 0%                      | 23  | 0%                      | 21  |
| 3     | Sorted                                  | 0%                      | 24 | 0%                      | 24  | 0%                      | 24  |
|       | Mated                                   | 38%                     | 98 | 36%                     | 151 | 37%                     | 121 |
|       | Diploid-selected                        | 100%                    | 30 | 100%                    | 21  | 100%                    | 40  |
|       | Haploid-selected and induced (unsorted) | 0%                      | 24 | 0%                      | 24  | 0%                      | 24  |
| 4     | Sorted                                  | 4%                      | 24 | 0%                      | 24  | 0%                      | 24  |
|       | Mated                                   | 23%                     | 99 | 24%                     | 63  | 18%                     | 100 |
|       | Diploid-selected                        | 100%                    | 92 | 100%                    | 73  | 100%                    | 45  |
|       | Haploid-selected and induced (unsorted) | 42%                     | 24 | 33%                     | 24  | 0%                      | 24  |
| 5     | Sorted                                  | 0%                      | 24 | 4%                      | 24  | 6%                      | 36  |

**Supplementary Table 6.** Statistical analysis of the *en masse* processes.

Mann-Whitney U tests were used to calculate p-values (1-tail for sorted vs. unsorted and 2-tail for comparison with the corresponding sorted sample of the previous round).

Round 0 corresponds to the initial ProMonster single mutants, which contain exactly one deletion.

One round is defined to start before mating and end after cell sorting.

SD: standard deviation.

Series 1

| Round | Average deletion number |     |        |     | p-value             |                                           |                                         |           |  |
|-------|-------------------------|-----|--------|-----|---------------------|-------------------------------------------|-----------------------------------------|-----------|--|
|       | Unsorted                | SD  | Sorted | SD  | Sorted vs. unsorted | Unsorted vs. sorted of the previous round | Sorted vs. sorted of the previous round |           |  |
| 1     | 1.1                     | 0.6 | 1.8    | 0.4 | 0.0002              |                                           | 0.3                                     | 0.0000004 |  |
| 2     | 1.5                     | 0.9 | 3.0    | 0.8 | 0.000002            |                                           | 0.2                                     | 0.000001  |  |
| 3     | 3.0                     | 1.0 | 4.2    | 0.9 | 0.0001              |                                           | 1                                       | 0.00005   |  |
| 4     | 4.2                     | 1.0 | 5.3    | 0.7 | 0.0001              |                                           | 0.9                                     | 0.00003   |  |
| 5     | 5.1                     | 1.0 | 5.8    | 0.9 | 0.01                |                                           | 0.6                                     | 0.02      |  |

Series 2

| Round | Average deletion number |     |        |     | p-value             |                                           |                                         |            |  |
|-------|-------------------------|-----|--------|-----|---------------------|-------------------------------------------|-----------------------------------------|------------|--|
|       | Unsorted                | SD  | Sorted | SD  | Sorted vs. unsorted | Unsorted vs. sorted of the previous round | Sorted vs. sorted of the previous round |            |  |
| 1     | 1.0                     | 0.8 | 1.7    | 0.4 | 0.0004              |                                           | 1                                       | 0.0000002  |  |
| 2     | 1.4                     | 0.7 | 3.2    | 0.7 | 0.000000009         |                                           | 0.04                                    | 0.00000002 |  |
| 3     | 2.9                     | 1.0 | 4.4    | 0.9 | 0.000005            |                                           | 0.2                                     | 0.00001    |  |
| 4     | 3.4                     | 0.9 | 5.4    | 0.9 | 0.00000003          |                                           | 0.0007                                  | 0.0003     |  |
| 5     | 4.9                     | 1.3 | 6.7    | 0.7 | 0.000009            |                                           | 0.2                                     | 0.00002    |  |

Series 3

| Round | Average deletion number |     |        |     | p-value             |                                           |                                         |             |  |
|-------|-------------------------|-----|--------|-----|---------------------|-------------------------------------------|-----------------------------------------|-------------|--|
|       | Unsorted                | SD  | Sorted | SD  | Sorted vs. unsorted | Unsorted vs. sorted of the previous round | Sorted vs. sorted of the previous round |             |  |
| 1     | 0.7                     | 0.6 | 1.9    | 0.3 | 0.00000001          |                                           | 0.02                                    | 0.000000003 |  |
| 2     | 1.8                     | 1.1 | 3.0    | 0.6 | 0.00004             |                                           | 0.6                                     | 0.00000002  |  |
| 3     | 3.0                     | 1.1 | 4.4    | 0.8 | 0.00004             |                                           | 0.8                                     | 0.0000001   |  |
| 4     | 3.8                     | 1.2 | 5.2    | 1.1 | 0.0001              |                                           | 0.05                                    | 0.006       |  |
| 5     | 4.6                     | 1.2 | 6.2    | 0.8 | 0.000002            |                                           | 0.08                                    | 0.0005      |  |

**Supplementary Table 7.** Cumulative frequency of drugs for each drug-affected growth rate range.

Exponential growth rate with drug relative to that without was calculated as a measure of sensitivity (resistance).

For varying cut-offs between <0.1 and <0.95 for this ratio (i.e., >90% to >5% inhibition of growth rate), both the ABC16-monster and AD12345678 were sensitive to roughly twice as many drugs as the wild type control.

More drugs strongly inhibited the ABC16-monster between the ratios 0.2 and 0.4.

The ABC16-monster was weakly sensitive (in the 0.95-to-1.0 range) to a large number of drugs,

| Exponential growth rate of drugged relative to that of non-drugged | Wild type (BY4742) | AD12345678 | ABC16-monster (RY0513) |
|--------------------------------------------------------------------|--------------------|------------|------------------------|
| 0.05                                                               | 10                 | 3          | 1                      |
| 0.10                                                               | 11                 | 23         | 20                     |
| 0.15                                                               | 12                 | 24         | 27                     |
| 0.20                                                               | 15                 | 27         | 34                     |
| 0.25                                                               | 15                 | 30         | 39                     |
| 0.30                                                               | 16                 | 34         | 42                     |
| 0.35                                                               | 23                 | 42         | 47                     |
| 0.40                                                               | 24                 | 44         | 50                     |
| 0.45                                                               | 25                 | 49         | 51                     |
| 0.50                                                               | 28                 | 55         | 54                     |
| 0.55                                                               | 30                 | 60         | 56                     |
| 0.60                                                               | 30                 | 66         | 62                     |
| 0.65                                                               | 33                 | 72         | 62                     |
| 0.70                                                               | 33                 | 80         | 66                     |
| 0.75                                                               | 35                 | 84         | 71                     |
| 0.80                                                               | 36                 | 94         | 80                     |
| 0.85                                                               | 39                 | 102        | 92                     |
| 0.90                                                               | 51                 | 115        | 107                    |
| 0.95                                                               | 81                 | 141        | 143                    |
| 1.00                                                               | 206                | 208        | 294                    |
| 1.05                                                               | 385                | 359        | 397                    |
| 1.10                                                               | 397                | 393        | 397                    |
| 1.15                                                               | 397                | 395        | 397                    |
| 1.20                                                               | 397                | 397        | 397                    |

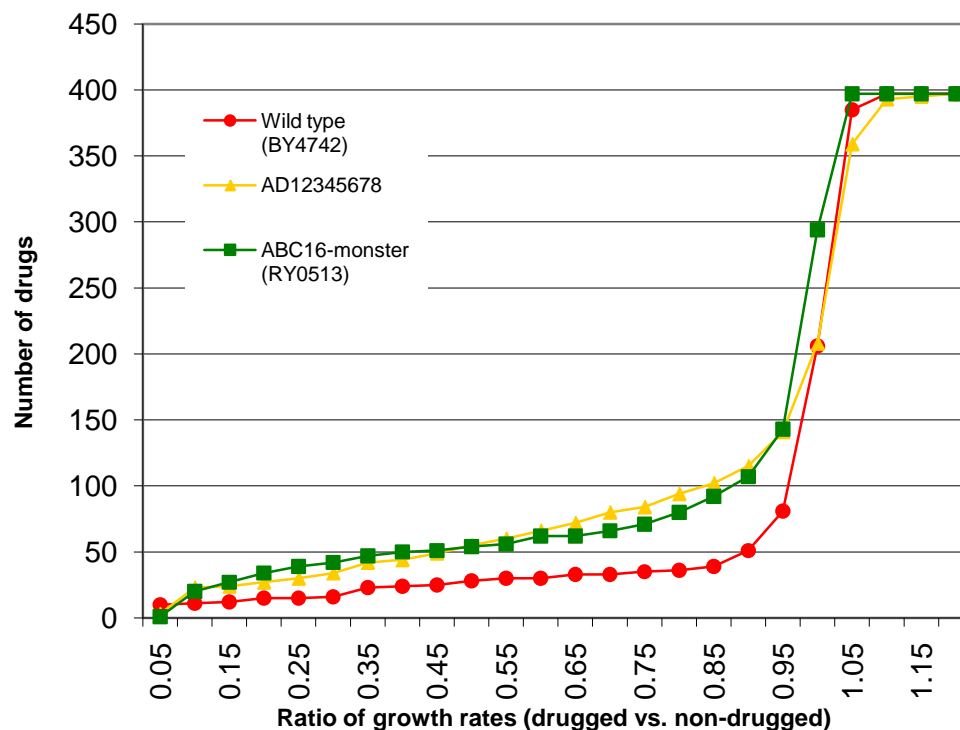

**Supplementary Table 8.** Drug assay using drugs of the NIH Clinical Collection. The ratios of exponential growth rates with vs. without drug are shown. We note that clotrimazole, benidipine, cisapride, and perospirone had a large effect on the ABC16-monster and only a small effect on AD12345678. For comparison of ratios, we required different values to be at least 5% different, except in the comparison marked with asterisk, where even small differences were included.

| Number | Drug                                                           | Wild type<br>(BY4742) | Drug-<br>hypersensi-<br>tive strain<br>(AD12345<br>678) | ABC16-<br>monster<br>(RY0513) | ABC16-<br>monster<br>more<br>sensitive<br>than<br>AD123456<br>78 * | AD123456<br>78 more<br>sensitive<br>than wild<br>type | ABC16-<br>monster<br>more<br>sensitive<br>than wild<br>type | ABC16-<br>monster<br>more<br>sensitive<br>than<br>AD123456<br>78 | ABC16-<br>monster<br>as<br>sensitive<br>as<br>AD123456<br>78 | Neither<br>sensitive,<br>compared<br>to WT | Mutant<br>sensitive &<br>ABC16-<br>monster<br>more<br>sensitive<br>than<br>AD123456<br>78 | Mutant<br>sensitive &<br>both<br>strains<br>comparabl<br>e | Mutant<br>sensitive &<br>AD123456<br>78 more<br>sensitive<br>than<br>ABC16-<br>monster |
|--------|----------------------------------------------------------------|-----------------------|---------------------------------------------------------|-------------------------------|--------------------------------------------------------------------|-------------------------------------------------------|-------------------------------------------------------------|------------------------------------------------------------------|--------------------------------------------------------------|--------------------------------------------|-------------------------------------------------------------------------------------------|------------------------------------------------------------|----------------------------------------------------------------------------------------|
| 1      | lomeperazine dihydrochloride                                   | 0.94                  | 0.05                                                    | 0.05                          | 0                                                                  | 1                                                     | 1                                                           | 0                                                                | 1                                                            | 0                                          | 0                                                                                         | 1                                                          | 0                                                                                      |
| 2      | clotrimazole                                                   | 0.35                  | 0.96                                                    | 0.07                          | 1                                                                  | 0                                                     | 1                                                           | 1                                                                | 0                                                            | 0                                          | 1                                                                                         | 0                                                          | 0                                                                                      |
| 3      | loratadine                                                     | 0.09                  | 0.05                                                    | 0.07                          | 0                                                                  | 1                                                     | 1                                                           | 0                                                                | 0                                                            | 0                                          | 0                                                                                         | 0                                                          | 1                                                                                      |
| 4      | naftopidil                                                     | 0.85                  | 0.05                                                    | 0.05                          | 0                                                                  | 1                                                     | 1                                                           | 0                                                                | 1                                                            | 0                                          | 0                                                                                         | 1                                                          | 0                                                                                      |
| 5      | nefazodone                                                     | 0.82                  | 0.05                                                    | 0.05                          | 0                                                                  | 1                                                     | 1                                                           | 0                                                                | 1                                                            | 0                                          | 0                                                                                         | 1                                                          | 0                                                                                      |
| 6      | efavirenz                                                      | 0.51                  | 0.05                                                    | 0.07                          | 0                                                                  | 1                                                     | 1                                                           | 0                                                                | 0                                                            | 0                                          | 0                                                                                         | 0                                                          | 1                                                                                      |
| 7      | aripiprazole                                                   | 0.19                  | 0.64                                                    | 0.07                          | 1                                                                  | 0                                                     | 1                                                           | 1                                                                | 0                                                            | 0                                          | 1                                                                                         | 0                                                          | 0                                                                                      |
| 8      | oxiconazole nitrate                                            | 0.29                  | 0.41                                                    | 0.07                          | 1                                                                  | 0                                                     | 1                                                           | 1                                                                | 0                                                            | 0                                          | 1                                                                                         | 0                                                          | 0                                                                                      |
| 9      | indatraline                                                    | 0.03                  | 0.05                                                    | 0.07                          | 0                                                                  | 0                                                     | 0                                                           | 0                                                                | 0                                                            | 1                                          | 0                                                                                         | 0                                                          | 0                                                                                      |
| 10     | trifluoperazine dihydrochloride                                | 0.03                  | 0.05                                                    | 0.07                          | 0                                                                  | 0                                                     | 0                                                           | 0                                                                | 0                                                            | 1                                          | 0                                                                                         | 0                                                          | 0                                                                                      |
| 11     | honokiol                                                       | 0.03                  | 0.05                                                    | 0.07                          | 0                                                                  | 0                                                     | 0                                                           | 0                                                                | 0                                                            | 1                                          | 0                                                                                         | 0                                                          | 0                                                                                      |
| 12     | sertraline                                                     | 0.03                  | 0.05                                                    | 0.07                          | 0                                                                  | 0                                                     | 0                                                           | 0                                                                | 0                                                            | 1                                          | 0                                                                                         | 0                                                          | 0                                                                                      |
| 13     | bifonazole                                                     | 0.03                  | 0.05                                                    | 0.07                          | 0                                                                  | 0                                                     | 0                                                           | 0                                                                | 0                                                            | 1                                          | 0                                                                                         | 0                                                          | 0                                                                                      |
| 14     | pterostilbene                                                  | 0.03                  | 0.05                                                    | 0.07                          | 0                                                                  | 0                                                     | 0                                                           | 0                                                                | 0                                                            | 1                                          | 0                                                                                         | 0                                                          | 0                                                                                      |
| 15     | tegaserod maleate fluphenazine hydrochloride                   | 0.03                  | 0.05                                                    | 0.07                          | 0                                                                  | 0                                                     | 0                                                           | 0                                                                | 0                                                            | 1                                          | 0                                                                                         | 0                                                          | 0                                                                                      |
| 16     | hydrochloride                                                  | 0.03                  | 0.05                                                    | 0.07                          | 0                                                                  | 0                                                     | 0                                                           | 0                                                                | 0                                                            | 1                                          | 0                                                                                         | 0                                                          | 0                                                                                      |
| 17     | toremifene citrate                                             | 0.03                  | 0.05                                                    | 0.07                          | 0                                                                  | 0                                                     | 0                                                           | 0                                                                | 0                                                            | 1                                          | 0                                                                                         | 0                                                          | 0                                                                                      |
| 18     | benidipine hcl                                                 | 0.96                  | 1.09                                                    | 0.05                          | 1                                                                  | 0                                                     | 1                                                           | 1                                                                | 0                                                            | 0                                          | 1                                                                                         | 0                                                          | 0                                                                                      |
| 19     | doxorubicin hydrochloride                                      | 0.46                  | 0.31                                                    | 0.08                          | 1                                                                  | 1                                                     | 1                                                           | 1                                                                | 0                                                            | 0                                          | 1                                                                                         | 0                                                          | 0                                                                                      |
| 20     | telmisartan                                                    | 0.33                  | 0.40                                                    | 0.09                          | 1                                                                  | 0                                                     | 1                                                           | 1                                                                | 0                                                            | 0                                          | 1                                                                                         | 0                                                          | 0                                                                                      |
| 21     | tricalabandazole                                               | 0.14                  | 0.31                                                    | 0.11                          | 1                                                                  | 0                                                     | 1                                                           | 1                                                                | 0                                                            | 0                                          | 1                                                                                         | 0                                                          | 0                                                                                      |
| 22     | epirubicin hydrochloride                                       | 0.79                  | 0.29                                                    | 0.12                          | 1                                                                  | 1                                                     | 1                                                           | 1                                                                | 0                                                            | 0                                          | 1                                                                                         | 0                                                          | 0                                                                                      |
| 23     | idarubicin hcl                                                 | 0.18                  | 0.16                                                    | 0.12                          | 1                                                                  | 1                                                     | 1                                                           | 1                                                                | 0                                                            | 0                                          | 1                                                                                         | 0                                                          | 0                                                                                      |
| 24     | mesoridazine                                                   | 0.34                  | 0.17                                                    | 0.12                          | 1                                                                  | 1                                                     | 1                                                           | 1                                                                | 0                                                            | 0                                          | 1                                                                                         | 0                                                          | 0                                                                                      |
| 25     | ethinylestradiol                                               | 0.93                  | 0.20                                                    | 0.10                          | 1                                                                  | 1                                                     | 1                                                           | 1                                                                | 0                                                            | 0                                          | 1                                                                                         | 0                                                          | 0                                                                                      |
| 26     | megestrol acetate                                              | 0.96                  | 0.46                                                    | 0.13                          | 1                                                                  | 1                                                     | 1                                                           | 1                                                                | 0                                                            | 0                                          | 1                                                                                         | 0                                                          | 0                                                                                      |
| 27     | diphenylcyclopropenone tetraethylthiuram disulfide             | 0.46                  | 0.35                                                    | 0.16                          | 1                                                                  | 1                                                     | 1                                                           | 1                                                                | 0                                                            | 0                                          | 1                                                                                         | 0                                                          | 0                                                                                      |
| 28     | disulfide                                                      | 0.03                  | 0.05                                                    | 0.16                          | 0                                                                  | 0                                                     | 0                                                           | 0                                                                | 0                                                            | 1                                          | 0                                                                                         | 0                                                          | 0                                                                                      |
| 29     | progesterone                                                   | 0.90                  | 0.34                                                    | 0.15                          | 1                                                                  | 1                                                     | 1                                                           | 1                                                                | 0                                                            | 0                                          | 1                                                                                         | 0                                                          | 0                                                                                      |
| 30     | ethylestrenol                                                  | 0.93                  | 0.24                                                    | 0.15                          | 1                                                                  | 1                                                     | 1                                                           | 1                                                                | 0                                                            | 0                                          | 1                                                                                         | 0                                                          | 0                                                                                      |
| 31     | 3-deoxyadenosine                                               | 0.98                  | 0.35                                                    | 0.16                          | 1                                                                  | 1                                                     | 1                                                           | 1                                                                | 0                                                            | 0                                          | 1                                                                                         | 0                                                          | 0                                                                                      |
| 32     | ketocanazole                                                   | 0.49                  | 0.27                                                    | 0.20                          | 1                                                                  | 1                                                     | 1                                                           | 1                                                                | 0                                                            | 0                                          | 1                                                                                         | 0                                                          | 0                                                                                      |
| 33     | latanoprost                                                    | 0.99                  | 0.23                                                    | 0.16                          | 1                                                                  | 1                                                     | 1                                                           | 1                                                                | 0                                                            | 0                                          | 1                                                                                         | 0                                                          | 0                                                                                      |
| 34     | lofepramine                                                    | 0.90                  | 0.39                                                    | 0.19                          | 1                                                                  | 1                                                     | 1                                                           | 1                                                                | 0                                                            | 0                                          | 1                                                                                         | 0                                                          | 0                                                                                      |
| 35     | carvedilol                                                     | 0.99                  | 0.43                                                    | 0.18                          | 1                                                                  | 1                                                     | 1                                                           | 1                                                                | 0                                                            | 0                                          | 1                                                                                         | 0                                                          | 0                                                                                      |
| 36     | cisapride                                                      | 0.97                  | 0.88                                                    | 0.20                          | 1                                                                  | 1                                                     | 1                                                           | 1                                                                | 0                                                            | 0                                          | 1                                                                                         | 0                                                          | 0                                                                                      |
| 37     | ezetimibe                                                      | 1.03                  | 0.05                                                    | 0.21                          | 0                                                                  | 1                                                     | 1                                                           | 0                                                                | 0                                                            | 0                                          | 0                                                                                         | 0                                                          | 1                                                                                      |
| 38     | idebenone                                                      | 0.64                  | 0.05                                                    | 0.28                          | 0                                                                  | 1                                                     | 1                                                           | 0                                                                | 0                                                            | 0                                          | 0                                                                                         | 0                                                          | 1                                                                                      |
| 39     | calcitriol                                                     | 1.00                  | 0.58                                                    | 0.22                          | 1                                                                  | 1                                                     | 1                                                           | 1                                                                | 0                                                            | 0                                          | 1                                                                                         | 0                                                          | 0                                                                                      |
| 40     | perospirone hcl                                                | 0.90                  | 0.94                                                    | 0.24                          | 1                                                                  | 0                                                     | 1                                                           | 1                                                                | 0                                                            | 0                                          | 1                                                                                         | 0                                                          | 0                                                                                      |
| 41     | terbinafine hcl                                                | 0.31                  | 0.50                                                    | 0.33                          | 1                                                                  | 0                                                     | 0                                                           | 1                                                                | 0                                                            | 1                                          | 0                                                                                         | 0                                                          | 0                                                                                      |
| 42     | calcipotriol                                                   | 1.01                  | 0.05                                                    | 0.26                          | 0                                                                  | 1                                                     | 1                                                           | 0                                                                | 0                                                            | 0                                          | 0                                                                                         | 0                                                          | 1                                                                                      |
| 43     | 3-[3,5-dibromo-4-hydroxybenzoyl]-2-ethylbenzofuran             | 0.35                  | 0.05                                                    | 0.34                          | 0                                                                  | 1                                                     | 0                                                           | 0                                                                | 0                                                            | 0                                          | 0                                                                                         | 0                                                          | 1                                                                                      |
| 44     | methyltestosterone                                             | 0.88                  | 0.51                                                    | 0.30                          | 1                                                                  | 1                                                     | 1                                                           | 1                                                                | 0                                                            | 0                                          | 1                                                                                         | 0                                                          | 0                                                                                      |
| 45     | nifedipine                                                     | 0.89                  | 0.49                                                    | 0.30                          | 1                                                                  | 1                                                     | 1                                                           | 1                                                                | 0                                                            | 0                                          | 1                                                                                         | 0                                                          | 0                                                                                      |
| 46     | 2h-indol-2-one,1,3-dihydro-1-phenyl-3,3-bis(4-pyridinylmethyl) | 0.96                  | 0.82                                                    | 0.38                          | 1                                                                  | 1                                                     | 1                                                           | 1                                                                | 0                                                            | 0                                          | 1                                                                                         | 0                                                          | 0                                                                                      |
| 47     | ifenprodil                                                     | 0.92                  | 0.56                                                    | 0.31                          | 1                                                                  | 1                                                     | 1                                                           | 1                                                                | 0                                                            | 0                                          | 1                                                                                         | 0                                                          | 0                                                                                      |
| 48     | enrofloxacin                                                   | 0.93                  | 0.51                                                    | 0.38                          | 1                                                                  | 1                                                     | 1                                                           | 1                                                                | 0                                                            | 0                                          | 1                                                                                         | 0                                                          | 0                                                                                      |
| 49     | finasteride                                                    | 0.97                  | 0.65                                                    | 0.30                          | 1                                                                  | 1                                                     | 1                                                           | 1                                                                | 0                                                            | 0                                          | 1                                                                                         | 0                                                          | 0                                                                                      |
| 50     | cervastatin na                                                 | 0.60                  | 0.34                                                    | 0.41                          | 0                                                                  | 1                                                     | 1                                                           | 0                                                                | 0                                                            | 0                                          | 0                                                                                         | 0                                                          | 1                                                                                      |
| 51     | artesunate                                                     | 0.91                  | 0.59                                                    | 0.35                          | 1                                                                  | 1                                                     | 1                                                           | 1                                                                | 0                                                            | 0                                          | 1                                                                                         | 0                                                          | 0                                                                                      |
| 52     | itraconazole                                                   | 0.71                  | 0.61                                                    | 0.46                          | 1                                                                  | 1                                                     | 1                                                           | 1                                                                | 0                                                            | 0                                          | 1                                                                                         | 0                                                          | 0                                                                                      |
| 53     | voriconazole                                                   | 0.50                  | 0.65                                                    | 0.47                          | 1                                                                  | 0                                                     | 1                                                           | 1                                                                | 0                                                            | 0                                          | 1                                                                                         | 0                                                          | 0                                                                                      |
| 54     | itavastatin ca                                                 | 0.71                  | 0.55                                                    | 0.47                          | 1                                                                  | 1                                                     | 1                                                           | 1                                                                | 0                                                            | 0                                          | 1                                                                                         | 0                                                          | 0                                                                                      |
| 55     | nimodipine                                                     | 0.99                  | 0.13                                                    | 0.56                          | 0                                                                  | 1                                                     | 1                                                           | 0                                                                | 0                                                            | 0                                          | 0                                                                                         | 0                                                          | 1                                                                                      |
| 56     | 5-fluorocytosine                                               | 0.33                  | 0.48                                                    | 0.57                          | 0                                                                  | 0                                                     | 0                                                           | 0                                                                | 0                                                            | 1                                          | 0                                                                                         | 0                                                          | 0                                                                                      |
| 57     | moxifloxacin hcl                                               | 1.00                  | 0.63                                                    | 0.54                          | 1                                                                  | 1                                                     | 1                                                           | 1                                                                | 0                                                            | 0                                          | 1                                                                                         | 0                                                          | 0                                                                                      |
| 58     | am-251                                                         | 1.07                  | 0.49                                                    | 0.69                          | 0                                                                  | 1                                                     | 1                                                           | 0                                                                | 0                                                            | 0                                          | 0                                                                                         | 0                                                          | 1                                                                                      |
| 59     | exemestane                                                     | 0.97                  | 0.86                                                    | 0.54                          | 1                                                                  | 1                                                     | 1                                                           | 1                                                                | 0                                                            | 0                                          | 1                                                                                         | 0                                                          | 0                                                                                      |
| 60     | dolasetron mesylate                                            | 0.99                  | 1.02                                                    | 0.71                          | 1                                                                  | 0                                                     | 1                                                           | 1                                                                | 0                                                            | 0                                          | 1                                                                                         | 0                                                          | 0                                                                                      |
| 61     | duloxetine hcl                                                 | 0.64                  | 0.54                                                    | 0.71                          | 0                                                                  | 1                                                     | 0                                                           | 0                                                                | 0                                                            | 0                                          | 0                                                                                         | 0                                                          | 1                                                                                      |



|     |                                                                                                               |      |      |      |   |   |   |   |   |   |   |   |   |
|-----|---------------------------------------------------------------------------------------------------------------|------|------|------|---|---|---|---|---|---|---|---|---|
| 62  | pramipexole                                                                                                   | 1.01 | 0.53 | 0.59 | 0 | 1 | 1 | 0 | 0 | 0 | 0 | 0 | 1 |
| 63  | nobiletin                                                                                                     | 0.91 | 0.90 | 0.57 | 1 | 0 | 1 | 1 | 0 | 0 | 1 | 0 | 0 |
| 64  | diphenoxylate                                                                                                 | 1.01 | 0.83 | 0.58 | 1 | 1 | 1 | 1 | 0 | 0 | 1 | 0 | 0 |
| 65  | carbamofur                                                                                                    | 0.42 | 0.59 | 0.76 | 0 | 0 | 0 | 0 | 0 | 1 | 0 | 0 | 0 |
| 66  | tibolone                                                                                                      | 0.99 | 0.79 | 0.78 | 1 | 1 | 1 | 0 | 1 | 0 | 0 | 1 | 0 |
| 67  | isradipine                                                                                                    | 0.97 | 0.18 | 0.60 | 0 | 1 | 1 | 0 | 0 | 0 | 0 | 0 | 1 |
| 68  | rimcazole                                                                                                     | 0.31 | 0.66 | 0.80 | 0 | 0 | 0 | 0 | 0 | 1 | 0 | 0 | 0 |
| 69  | phenothiazine                                                                                                 | 0.87 | 0.77 | 0.82 | 0 | 1 | 1 | 0 | 0 | 0 | 0 | 0 | 1 |
| 70  | synephrine                                                                                                    | 1.03 | 0.99 | 0.82 | 1 | 0 | 1 | 1 | 0 | 0 | 1 | 0 | 0 |
| 71  | nisoldipine                                                                                                   | 0.32 | 0.27 | 0.83 | 0 | 1 | 0 | 0 | 0 | 0 | 0 | 0 | 1 |
| 72  | bicalutamide                                                                                                  | 0.98 | 0.65 | 0.66 | 0 | 1 | 1 | 0 | 1 | 0 | 0 | 1 | 0 |
| 73  | nefinavir mesylate                                                                                            | 0.99 | 0.70 | 0.67 | 1 | 1 | 1 | 0 | 1 | 0 | 0 | 1 | 0 |
| 74  | ru 24969                                                                                                      | 1.01 | 1.06 | 0.86 | 1 | 0 | 1 | 1 | 0 | 0 | 1 | 0 | 0 |
| 75  | nitazoxanide                                                                                                  | 0.95 | 0.99 | 0.66 | 1 | 0 | 1 | 1 | 0 | 0 | 1 | 0 | 0 |
| 76  | medroxyprogesterone                                                                                           | 1.00 | 0.90 | 0.87 | 1 | 1 | 1 | 0 | 1 | 0 | 0 | 1 | 0 |
| 77  | stiripentol                                                                                                   | 0.94 | 0.88 | 0.88 | 0 | 1 | 1 | 0 | 1 | 0 | 0 | 1 | 0 |
| 78  | corticosterone                                                                                                | 1.02 | 0.95 | 0.89 | 1 | 1 | 1 | 1 | 0 | 0 | 1 | 0 | 0 |
| 79  | tremulacin                                                                                                    | 1.02 | 1.03 | 0.90 | 1 | 0 | 1 | 1 | 0 | 0 | 1 | 0 | 0 |
| 80  | desoximetasone                                                                                                | 0.95 | 0.95 | 0.90 | 1 | 0 | 1 | 1 | 0 | 0 | 1 | 0 | 0 |
| 81  | ketotifen fumarate                                                                                            | 0.99 | 1.02 | 0.90 | 1 | 0 | 1 | 1 | 0 | 0 | 1 | 0 | 0 |
| 82  | beta-estradiol                                                                                                | 0.92 | 0.85 | 0.73 | 1 | 1 | 1 | 1 | 0 | 0 | 1 | 0 | 0 |
| 83  | omeprazole                                                                                                    | 0.99 | 1.09 | 0.91 | 1 | 0 | 1 | 1 | 0 | 0 | 1 | 0 | 0 |
| 84  | midazolam hcl                                                                                                 | 0.98 | 0.76 | 0.71 | 1 | 1 | 1 | 1 | 0 | 0 | 1 | 0 | 0 |
|     | methanesulfonamide, n-[4-[[1-[2-(6-methyl-2-pyridinyl)ethyl]-4-piperidinyl]carbonyl]phenyl]-, dihydrochloride | 1.01 | 1.05 | 0.92 | 1 | 0 | 1 | 1 | 0 | 0 | 1 | 0 | 0 |
| 85  | nyl]-, dihydrochloride                                                                                        | 1.01 | 1.05 | 0.92 | 1 | 0 | 1 | 1 | 0 | 0 | 1 | 0 | 0 |
| 86  | vardenafil citrate                                                                                            | 1.00 | 0.99 | 0.92 | 1 | 0 | 1 | 1 | 0 | 0 | 1 | 0 | 0 |
| 87  | chlordiazepoxide dextrorpheniramine maleate                                                                   | 0.96 | 0.98 | 0.93 | 1 | 0 | 0 | 1 | 0 | 1 | 0 | 0 | 0 |
| 88  | maleate                                                                                                       | 0.99 | 1.00 | 0.93 | 1 | 0 | 1 | 1 | 0 | 0 | 1 | 0 | 0 |
| 89  | capsaicin                                                                                                     | 0.92 | 0.69 | 0.76 | 0 | 1 | 1 | 0 | 0 | 0 | 0 | 0 | 1 |
| 90  | 5-methoxytryptamine guanidine, n-cyano-n-(1,1-dimethylpropyl)-n-3-pyridinyl                                   | 1.00 | 1.03 | 0.94 | 1 | 0 | 1 | 1 | 0 | 0 | 1 | 0 | 0 |
| 91  | pyridinyl                                                                                                     | 0.99 | 1.03 | 0.95 | 1 | 0 | 0 | 1 | 0 | 1 | 0 | 0 | 0 |
| 92  | cgs 15943                                                                                                     | 0.87 | 0.77 | 0.77 | 0 | 1 | 1 | 0 | 1 | 0 | 0 | 1 | 0 |
| 93  | 19-nortestosterone                                                                                            | 0.92 | 0.86 | 0.78 | 1 | 1 | 1 | 1 | 0 | 0 | 1 | 0 | 0 |
| 94  | oxyphenonium bromide                                                                                          | 0.99 | 1.03 | 0.95 | 1 | 0 | 0 | 1 | 0 | 1 | 0 | 0 | 0 |
| 95  | 7-nitroindazole                                                                                               | 1.00 | 1.03 | 0.96 | 1 | 0 | 0 | 1 | 0 | 1 | 0 | 0 | 0 |
| 96  | vecuronium bromide                                                                                            | 0.99 | 1.16 | 0.96 | 1 | 0 | 0 | 1 | 0 | 1 | 0 | 0 | 0 |
| 97  | i-694,247                                                                                                     | 0.99 | 1.00 | 0.96 | 1 | 0 | 0 | 0 | 1 | 1 | 0 | 0 | 0 |
| 98  | beclomethasone                                                                                                | 0.99 | 0.94 | 0.96 | 0 | 1 | 0 | 0 | 1 | 0 | 0 | 1 | 0 |
| 99  | hmt                                                                                                           | 1.00 | 0.96 | 0.97 | 0 | 0 | 0 | 0 | 1 | 1 | 0 | 0 | 0 |
| 100 | pinacidil monohydrate                                                                                         | 0.96 | 1.02 | 0.97 | 1 | 0 | 0 | 0 | 1 | 1 | 0 | 0 | 0 |
| 101 | cortisone                                                                                                     | 1.01 | 0.98 | 0.97 | 1 | 0 | 0 | 0 | 1 | 1 | 0 | 0 | 0 |
| 102 | 1-benzylimidazole                                                                                             | 1.03 | 1.03 | 0.97 | 1 | 0 | 1 | 1 | 0 | 0 | 1 | 0 | 0 |
| 103 | brucine                                                                                                       | 0.99 | 1.02 | 0.97 | 1 | 0 | 0 | 0 | 1 | 1 | 0 | 0 | 0 |
| 104 | doxapram hydrochloride                                                                                        | 1.01 | 1.02 | 0.97 | 1 | 0 | 0 | 0 | 1 | 1 | 0 | 0 | 0 |
| 105 | secoisolariciresinol                                                                                          | 1.02 | 0.98 | 0.97 | 1 | 0 | 0 | 0 | 1 | 1 | 0 | 0 | 0 |
| 106 | diazepam                                                                                                      | 0.93 | 0.84 | 0.75 | 1 | 1 | 1 | 1 | 0 | 0 | 1 | 0 | 0 |
| 107 | rolitetracycline                                                                                              | 1.03 | 1.05 | 0.97 | 1 | 0 | 1 | 1 | 0 | 0 | 1 | 0 | 0 |
| 108 | altanserin                                                                                                    | 1.00 | 1.00 | 0.75 | 1 | 0 | 1 | 1 | 0 | 0 | 1 | 0 | 0 |
| 109 | lofexidine hcl                                                                                                | 1.00 | 1.02 | 0.98 | 1 | 0 | 0 | 0 | 1 | 1 | 0 | 0 | 0 |
| 110 | resveratrol                                                                                                   | 1.00 | 1.02 | 0.98 | 1 | 0 | 0 | 0 | 1 | 1 | 0 | 0 | 0 |
|     | benzo[a]phenanthridine-10,11-diol, 5,6,6a,7,8,12b-hexahydro-, trans                                           | 0.99 | 0.98 | 0.98 | 0 | 0 | 0 | 0 | 1 | 1 | 0 | 0 | 0 |
| 111 | hexahydro-, trans                                                                                             | 0.99 | 0.98 | 0.98 | 0 | 0 | 0 | 0 | 1 | 1 | 0 | 0 | 0 |
| 112 | tramadol                                                                                                      | 1.01 | 1.02 | 0.99 | 1 | 0 | 0 | 0 | 1 | 1 | 0 | 0 | 0 |
| 113 | cefixime trihydrate                                                                                           | 1.02 | 1.04 | 0.99 | 1 | 0 | 0 | 0 | 1 | 1 | 0 | 0 | 0 |
| 114 | raltitrexed                                                                                                   | 1.00 | 1.09 | 0.99 | 1 | 0 | 0 | 1 | 0 | 1 | 0 | 0 | 0 |
| 115 | maltol                                                                                                        | 1.02 | 1.03 | 0.99 | 1 | 0 | 0 | 0 | 1 | 1 | 0 | 0 | 0 |
| 116 | dactinomycin                                                                                                  | 0.97 | 1.01 | 0.99 | 1 | 0 | 0 | 0 | 1 | 1 | 0 | 0 | 0 |
| 117 | cefdinir                                                                                                      | 1.02 | 1.03 | 0.99 | 1 | 0 | 0 | 0 | 1 | 1 | 0 | 0 | 0 |
| 118 | 3-pyridinemethanol                                                                                            | 1.03 | 0.98 | 0.99 | 0 | 0 | 0 | 0 | 1 | 1 | 0 | 0 | 0 |
| 119 | tryptoline                                                                                                    | 1.03 | 1.03 | 0.99 | 1 | 0 | 0 | 0 | 1 | 1 | 0 | 0 | 0 |
| 120 | naproxen sodium                                                                                               | 1.02 | 0.96 | 0.99 | 0 | 1 | 0 | 0 | 1 | 0 | 0 | 1 | 0 |
| 121 | rofecoxib                                                                                                     | 1.00 | 1.01 | 0.82 | 1 | 0 | 1 | 1 | 0 | 0 | 1 | 0 | 0 |
| 122 | dehydrocholic acid                                                                                            | 1.02 | 1.03 | 0.99 | 1 | 0 | 0 | 0 | 1 | 1 | 0 | 0 | 0 |
| 123 | anastrozole                                                                                                   | 1.02 | 1.05 | 0.99 | 1 | 0 | 0 | 1 | 0 | 1 | 0 | 0 | 0 |
| 124 | homoveratrylamine mepivacaine hydrochloride                                                                   | 1.03 | 1.04 | 1.00 | 1 | 0 | 0 | 0 | 1 | 1 | 0 | 0 | 0 |
| 125 | hydrochloride                                                                                                 | 1.01 | 1.09 | 1.00 | 1 | 0 | 0 | 1 | 0 | 1 | 0 | 0 | 0 |
| 126 | ropivacaine hcl                                                                                               | 1.02 | 1.05 | 1.00 | 1 | 0 | 0 | 0 | 1 | 1 | 0 | 0 | 0 |
| 127 | trimebutine maleate                                                                                           | 0.98 | 0.91 | 0.82 | 1 | 1 | 1 | 1 | 0 | 0 | 1 | 0 | 0 |
| 128 | xanthinol nicotinate                                                                                          | 1.03 | 0.99 | 1.00 | 0 | 0 | 0 | 0 | 1 | 1 | 0 | 0 | 0 |
| 129 | tinidazole                                                                                                    | 1.00 | 1.01 | 1.00 | 1 | 0 | 0 | 0 | 1 | 1 | 0 | 0 | 0 |
| 130 | cefaclor                                                                                                      | 0.98 | 1.03 | 1.00 | 1 | 0 | 0 | 0 | 1 | 1 | 0 | 0 | 0 |
| 131 | 6-aminoindazole 2-chloro-2-deoxyadenosine                                                                     | 1.02 | 1.04 | 1.00 | 1 | 0 | 0 | 0 | 1 | 1 | 0 | 0 | 0 |
| 132 | deoxyadenosine                                                                                                | 1.02 | 1.05 | 1.00 | 1 | 0 | 0 | 0 | 1 | 1 | 0 | 0 | 0 |
| 133 | granisetron hcl                                                                                               | 1.01 | 1.03 | 1.00 | 1 | 0 | 0 | 0 | 1 | 1 | 0 | 0 | 0 |
| 134 | 6-azauridine                                                                                                  | 0.98 | 1.00 | 1.00 | 0 | 0 | 0 | 0 | 1 | 1 | 0 | 0 | 0 |
| 135 | nafadotride                                                                                                   | 1.00 | 1.07 | 1.00 | 1 | 0 | 0 | 1 | 0 | 1 | 0 | 0 | 0 |
| 136 | zolmitriptan                                                                                                  | 1.02 | 1.03 | 1.00 | 1 | 0 | 0 | 0 | 1 | 1 | 0 | 0 | 0 |



|     |                                                                                                                                                      |      |      |      |   |   |   |   |   |   |   |   |   |
|-----|------------------------------------------------------------------------------------------------------------------------------------------------------|------|------|------|---|---|---|---|---|---|---|---|---|
| 198 | trazodone hydrochloride benzeneacetone trile, alpha-[3-[[2-(3,4-dimethoxyphenyl)ethyl]methylamino]propyl]-3,4-dimethoxy-alpha-(1-methylethyl)-, (R)- | 1.00 | 1.06 | 0.96 | 1 | 0 | 0 | 1 | 0 | 1 | 0 | 0 | 0 |
| 199 | nifekalant hcl                                                                                                                                       | 1.01 | 0.99 | 0.96 | 1 | 0 | 0 | 0 | 1 | 1 | 0 | 0 | 0 |
| 200 | rolipram                                                                                                                                             | 1.00 | 0.98 | 0.97 | 1 | 0 | 0 | 0 | 1 | 1 | 0 | 0 | 0 |
| 201 | ipriflavone                                                                                                                                          | 1.02 | 1.02 | 0.92 | 1 | 0 | 1 | 1 | 0 | 0 | 1 | 0 | 0 |
| 202 | pancuronium                                                                                                                                          | 1.00 | 0.91 | 0.92 | 0 | 1 | 1 | 0 | 1 | 0 | 0 | 1 | 0 |
| 203 | epigallocatechin gallate                                                                                                                             | 1.02 | 1.17 | 0.96 | 1 | 0 | 1 | 1 | 0 | 0 | 1 | 0 | 0 |
| 204 | flvoxamine                                                                                                                                           | 0.98 | 1.06 | 0.96 | 1 | 0 | 0 | 1 | 0 | 1 | 0 | 0 | 0 |
| 205 | cinanserin                                                                                                                                           | 0.94 | 0.86 | 0.96 | 0 | 1 | 0 | 0 | 0 | 0 | 0 | 0 | 1 |
| 206 | letrozol                                                                                                                                             | 0.97 | 0.58 | 0.96 | 0 | 1 | 0 | 0 | 0 | 0 | 0 | 0 | 1 |
| 207 | nateglinide                                                                                                                                          | 1.02 | 0.62 | 0.98 | 0 | 1 | 0 | 0 | 0 | 0 | 0 | 0 | 1 |
| 208 | 1h-cyclopenta[b]quinolin-9-amine, 2,3,5,6,7,8-hexahydro-, monohydrochloride                                                                          | 1.01 | 0.98 | 0.98 | 0 | 0 | 0 | 0 | 1 | 1 | 0 | 0 | 0 |
| 209 | cefatrizine propylene glycol                                                                                                                         | 0.88 | 0.93 | 0.97 | 0 | 0 | 0 | 0 | 1 | 1 | 0 | 0 | 0 |
| 210 | cephalexin monohydrate                                                                                                                               | 1.02 | 1.04 | 0.99 | 1 | 0 | 0 | 0 | 1 | 1 | 0 | 0 | 0 |
| 211 | (-)-cotinine                                                                                                                                         | 0.99 | 1.02 | 0.99 | 1 | 0 | 0 | 0 | 1 | 1 | 0 | 0 | 0 |
| 212 | atomoxetine hcl                                                                                                                                      | 0.99 | 0.97 | 0.97 | 0 | 0 | 0 | 0 | 1 | 1 | 0 | 0 | 0 |
| 213 | tiagabine hcl                                                                                                                                        | 1.00 | 0.86 | 0.99 | 0 | 1 | 0 | 0 | 0 | 0 | 0 | 0 | 1 |
| 214 | tosufloxacin tosylate                                                                                                                                | 0.99 | 1.00 | 0.99 | 1 | 0 | 0 | 0 | 1 | 1 | 0 | 0 | 0 |
| 215 | mestranol                                                                                                                                            | 1.01 | 0.97 | 0.99 | 0 | 0 | 0 | 0 | 1 | 1 | 0 | 0 | 0 |
| 216 | docetaxel                                                                                                                                            | 0.97 | 0.89 | 0.92 | 0 | 1 | 1 | 0 | 1 | 0 | 0 | 1 | 0 |
| 217 | nimetazepam                                                                                                                                          | 0.96 | 1.02 | 0.99 | 1 | 0 | 0 | 0 | 1 | 1 | 0 | 0 | 0 |
| 218 | ramipril                                                                                                                                             | 1.00 | 0.97 | 0.93 | 1 | 0 | 1 | 0 | 1 | 0 | 0 | 1 | 0 |
| 219 | 1-(2-methyl-5-nitroimidazol-1-yl)-propan-2-ol                                                                                                        | 1.03 | 0.94 | 0.99 | 0 | 1 | 0 | 0 | 0 | 0 | 0 | 0 | 1 |
| 220 | fempiverinium bromide                                                                                                                                | 1.03 | 1.01 | 0.99 | 1 | 0 | 0 | 0 | 1 | 1 | 0 | 0 | 0 |
| 221 | urapidil hydrochloride                                                                                                                               | 1.04 | 1.04 | 1.00 | 1 | 0 | 0 | 0 | 1 | 1 | 0 | 0 | 0 |
| 222 | l-glutamic acid, n-[4-[[[(2,4-diamino-6-pteridiny]methyl)methyl]amino]benzoyl]                                                                       | 0.98 | 1.01 | 0.98 | 1 | 0 | 0 | 0 | 1 | 1 | 0 | 0 | 0 |
| 223 | zafirlukast                                                                                                                                          | 1.01 | 1.04 | 0.98 | 1 | 0 | 0 | 1 | 0 | 1 | 0 | 0 | 0 |
| 224 | d-3-methoxy-n-methylmorphinan hydrobromide                                                                                                           | 1.03 | 0.42 | 0.93 | 0 | 1 | 1 | 0 | 0 | 0 | 0 | 0 | 1 |
| 225 | indomethacin                                                                                                                                         | 1.02 | 1.00 | 0.98 | 1 | 0 | 0 | 0 | 1 | 1 | 0 | 0 | 0 |
| 226 | troxipide                                                                                                                                            | 0.99 | 0.98 | 0.98 | 0 | 0 | 0 | 0 | 1 | 1 | 0 | 0 | 0 |
| 227 | argatroban                                                                                                                                           | 0.99 | 1.02 | 1.00 | 1 | 0 | 0 | 0 | 1 | 1 | 0 | 0 | 0 |
| 228 | tripelennamine hydrochloride                                                                                                                         | 1.01 | 1.05 | 0.95 | 1 | 0 | 1 | 1 | 0 | 0 | 1 | 0 | 0 |
| 229 | bisoprolol fumarate                                                                                                                                  | 0.98 | 0.99 | 0.99 | 0 | 0 | 0 | 0 | 1 | 1 | 0 | 0 | 0 |
| 230 | piceid                                                                                                                                               | 0.98 | 1.01 | 1.00 | 1 | 0 | 0 | 0 | 1 | 1 | 0 | 0 | 0 |
| 231 | glycine, n-[2-[(acetylthio)methyl]-1-oxo-3-phenylpropyl]-, phenylmethyl ester                                                                        | 1.01 | 0.99 | 1.00 | 0 | 0 | 0 | 0 | 1 | 1 | 0 | 0 | 0 |
| 232 | benazepril hcl                                                                                                                                       | 0.98 | 0.72 | 0.99 | 0 | 1 | 0 | 0 | 0 | 0 | 0 | 0 | 1 |
| 233 | nornicotine                                                                                                                                          | 0.96 | 0.96 | 0.95 | 1 | 0 | 0 | 0 | 1 | 1 | 0 | 0 | 0 |
| 234 | temozolomide                                                                                                                                         | 0.98 | 1.00 | 0.99 | 1 | 0 | 0 | 0 | 1 | 1 | 0 | 0 | 0 |
| 235 | alosetron hcl                                                                                                                                        | 0.93 | 1.00 | 1.00 | 0 | 0 | 0 | 0 | 1 | 1 | 0 | 0 | 0 |
| 236 | phenelzine sulfate salt                                                                                                                              | 0.90 | 1.02 | 1.00 | 1 | 0 | 0 | 0 | 1 | 1 | 0 | 0 | 0 |
| 237 | famciclovir                                                                                                                                          | 1.00 | 1.01 | 0.99 | 1 | 0 | 0 | 0 | 1 | 1 | 0 | 0 | 0 |
| 238 | benzeneacetic acid, 2-[(2,6-dichlorophenyl)amino]-, monosodium salt                                                                                  | 1.05 | 1.01 | 1.00 | 1 | 0 | 0 | 0 | 1 | 1 | 0 | 0 | 0 |
| 239 | pilocarpine hydrochloride                                                                                                                            | 0.97 | 0.92 | 0.99 | 0 | 1 | 0 | 0 | 0 | 0 | 0 | 0 | 1 |
| 240 | nizatidine                                                                                                                                           | 0.99 | 0.99 | 0.99 | 0 | 0 | 0 | 0 | 1 | 1 | 0 | 0 | 0 |
| 241 | amlexanox                                                                                                                                            | 1.00 | 1.01 | 1.01 | 0 | 0 | 0 | 0 | 1 | 1 | 0 | 0 | 0 |
| 242 | ozagrel hcl                                                                                                                                          | 0.96 | 0.98 | 0.95 | 1 | 0 | 0 | 0 | 1 | 1 | 0 | 0 | 0 |
| 243 | triptolide                                                                                                                                           | 0.94 | 0.98 | 0.95 | 1 | 0 | 0 | 0 | 1 | 1 | 0 | 0 | 0 |
| 244 | benzeneethanamine, n,alpha-dimethyl-n-2-propynyl                                                                                                     | 1.02 | 1.05 | 0.95 | 1 | 0 | 1 | 1 | 0 | 0 | 1 | 0 | 0 |
| 245 | tfmpp                                                                                                                                                | 1.01 | 1.03 | 0.99 | 1 | 0 | 0 | 0 | 1 | 1 | 0 | 0 | 0 |
| 246 | lidocaine                                                                                                                                            | 0.97 | 0.96 | 0.99 | 0 | 0 | 0 | 0 | 1 | 1 | 0 | 0 | 0 |
| 247 | amfebutamone hcl                                                                                                                                     | 1.01 | 1.01 | 0.99 | 1 | 0 | 0 | 0 | 1 | 1 | 0 | 0 | 0 |
| 248 | maprotiline hcl                                                                                                                                      | 1.03 | 1.00 | 1.01 | 0 | 0 | 0 | 0 | 1 | 1 | 0 | 0 | 0 |
| 249 | ondansetron hcl                                                                                                                                      | 0.94 | 0.40 | 0.99 | 0 | 1 | 0 | 0 | 0 | 0 | 0 | 0 | 1 |
| 250 | esomeprazole mg                                                                                                                                      | 1.01 | 1.04 | 1.01 | 1 | 0 | 0 | 0 | 1 | 1 | 0 | 0 | 0 |
| 251 | ly 171883                                                                                                                                            | 0.98 | 1.07 | 0.96 | 1 | 0 | 0 | 1 | 0 | 1 | 0 | 0 | 0 |
| 252 | galanthamine                                                                                                                                         | 0.98 | 0.91 | 1.00 | 0 | 1 | 0 | 0 | 0 | 0 | 0 | 0 | 1 |
| 253 | diphenhydramine hydrochloride                                                                                                                        | 1.01 | 1.02 | 1.00 | 1 | 0 | 0 | 0 | 1 | 1 | 0 | 0 | 0 |
| 254 | picrotin - picrotoxinin                                                                                                                              | 0.99 | 0.94 | 1.00 | 0 | 1 | 0 | 0 | 0 | 0 | 0 | 0 | 1 |
| 255 |                                                                                                                                                      | 1.01 | 1.04 | 1.00 | 1 | 0 | 0 | 0 | 1 | 1 | 0 | 0 | 0 |

|     |                                                                       |      |      |      |   |   |   |   |   |   |   |   |   |
|-----|-----------------------------------------------------------------------|------|------|------|---|---|---|---|---|---|---|---|---|
| 256 | orlistat                                                              | 0.97 | 1.02 | 1.01 | 1 | 0 | 0 | 0 | 1 | 1 | 0 | 0 | 0 |
| 257 | alfuzosin                                                             | 1.01 | 1.04 | 1.01 | 1 | 0 | 0 | 0 | 1 | 1 | 0 | 0 | 0 |
| 258 | lamotrigine                                                           | 1.06 | 1.03 | 1.01 | 1 | 0 | 0 | 0 | 1 | 1 | 0 | 0 | 0 |
| 259 | pirenerone                                                            | 1.01 | 1.02 | 0.95 | 1 | 0 | 1 | 1 | 0 | 0 | 1 | 0 | 0 |
| 260 | ormetoprim                                                            | 1.04 | 1.08 | 1.01 | 1 | 0 | 0 | 1 | 0 | 1 | 0 | 0 | 0 |
| 261 | olmesartan medoxomil                                                  | 1.01 | 0.99 | 1.02 | 0 | 0 | 0 | 0 | 1 | 1 | 0 | 0 | 0 |
| 262 | penciclovir                                                           | 1.01 | 1.00 | 0.95 | 1 | 0 | 1 | 0 | 1 | 0 | 0 | 1 | 0 |
| 263 | loteprednol etabonate                                                 | 0.97 | 0.83 | 0.95 | 0 | 1 | 0 | 0 | 0 | 0 | 0 | 0 | 1 |
| 264 | tocainide                                                             | 1.02 | 0.97 | 1.02 | 0 | 0 | 0 | 0 | 0 | 1 | 0 | 0 | 0 |
| 265 | ud                                                                    | 1.04 | 1.02 | 1.00 | 1 | 0 | 0 | 0 | 1 | 1 | 0 | 0 | 0 |
| 266 | ud                                                                    | 1.01 | 1.05 | 1.00 | 1 | 0 | 0 | 0 | 1 | 1 | 0 | 0 | 0 |
| 267 | ud                                                                    | 1.01 | 1.02 | 1.00 | 1 | 0 | 0 | 0 | 1 | 1 | 0 | 0 | 0 |
| 268 | ud                                                                    | 1.01 | 1.01 | 1.00 | 1 | 0 | 0 | 0 | 1 | 1 | 0 | 0 | 0 |
| 269 | methyl paroxetine                                                     | 0.92 | 0.49 | 1.02 | 0 | 1 | 0 | 0 | 0 | 0 | 0 | 0 | 1 |
| 270 | zileuton                                                              | 1.03 | 0.99 | 1.02 | 0 | 0 | 0 | 0 | 1 | 1 | 0 | 0 | 0 |
| 271 | pidotimod                                                             | 1.05 | 0.98 | 1.02 | 0 | 1 | 0 | 0 | 1 | 0 | 0 | 1 | 0 |
| 272 | meropenem                                                             | 1.05 | 0.98 | 1.02 | 0 | 1 | 0 | 0 | 1 | 0 | 0 | 1 | 0 |
| 273 | pizotyline                                                            | 0.86 | 0.27 | 1.00 | 0 | 1 | 0 | 0 | 0 | 0 | 0 | 0 | 1 |
| 274 | lobeline hydrochloride                                                | 0.98 | 1.07 | 0.95 | 1 | 0 | 0 | 1 | 0 | 1 | 0 | 0 | 0 |
| 275 | stavudine                                                             | 1.00 | 0.98 | 1.02 | 0 | 0 | 0 | 0 | 1 | 1 | 0 | 0 | 0 |
| 276 | losartan potassium (+)-3-hydroxy-n-methylmorphinan d-tartrate         | 1.01 | 1.04 | 1.02 | 1 | 0 | 0 | 0 | 1 | 1 | 0 | 0 | 0 |
| 277 | tartrate                                                              | 1.02 | 1.02 | 1.00 | 1 | 0 | 0 | 0 | 1 | 1 | 0 | 0 | 0 |
| 278 | linezolid                                                             | 1.03 | 0.93 | 0.95 | 0 | 1 | 1 | 0 | 1 | 0 | 0 | 1 | 0 |
| 279 | famotidine                                                            | 1.04 | 1.03 | 1.00 | 1 | 0 | 0 | 0 | 1 | 1 | 0 | 0 | 0 |
| 280 | flumazenil                                                            | 0.97 | 1.00 | 0.97 | 1 | 0 | 0 | 0 | 1 | 1 | 0 | 0 | 0 |
| 281 | levosulpiride                                                         | 0.99 | 1.01 | 1.02 | 0 | 0 | 0 | 0 | 1 | 1 | 0 | 0 | 0 |
| 282 | pemoline                                                              | 1.07 | 0.98 | 1.02 | 0 | 1 | 0 | 0 | 1 | 0 | 0 | 1 | 0 |
| 283 | azelastine hcl                                                        | 0.99 | 0.75 | 1.03 | 0 | 1 | 0 | 0 | 0 | 0 | 0 | 0 | 1 |
| 284 | salbutamol sulfate 4-thiazolidinecarboxylic acid, 2-oxo-, (R)-        | 1.03 | 1.02 | 1.01 | 1 | 0 | 0 | 0 | 1 | 1 | 0 | 0 | 0 |
| 285 | acid, 2-oxo-, (R)-                                                    | 1.02 | 1.04 | 1.01 | 1 | 0 | 0 | 0 | 1 | 1 | 0 | 0 | 0 |
| 286 | rosiglitazone maleate                                                 | 0.96 | 0.94 | 0.97 | 0 | 0 | 0 | 0 | 1 | 1 | 0 | 0 | 0 |
| 287 | rosiglitazone hcl                                                     | 0.95 | 0.98 | 0.97 | 1 | 0 | 0 | 0 | 1 | 1 | 0 | 0 | 0 |
| 288 | indinavir sulphate                                                    | 1.00 | 1.06 | 0.97 | 1 | 0 | 0 | 1 | 0 | 1 | 0 | 0 | 0 |
| 289 | phenprobamate                                                         | 0.99 | 1.01 | 0.97 | 1 | 0 | 0 | 0 | 1 | 1 | 0 | 0 | 0 |
| 290 | olanzapine                                                            | 1.02 | 1.01 | 0.97 | 1 | 0 | 0 | 0 | 1 | 1 | 0 | 0 | 0 |
| 291 | 5-amino-2-hydroxy-benzoic acid l-ornithine, n5-[imino(methylamino)met | 1.02 | 1.04 | 1.01 | 1 | 0 | 0 | 0 | 1 | 1 | 0 | 0 | 0 |
| 292 | hyl]                                                                  | 1.03 | 1.06 | 1.01 | 1 | 0 | 0 | 0 | 1 | 1 | 0 | 0 | 0 |
| 293 | metronidazole                                                         | 1.02 | 1.01 | 1.01 | 0 | 0 | 0 | 0 | 1 | 1 | 0 | 0 | 0 |
| 294 | oligomycin c                                                          | 0.96 | 0.98 | 0.98 | 0 | 0 | 0 | 0 | 1 | 1 | 0 | 0 | 0 |
| 295 | sr 57,227a memantine                                                  | 1.01 | 1.01 | 1.02 | 0 | 0 | 0 | 0 | 1 | 1 | 0 | 0 | 0 |
| 296 | hydrochloride                                                         | 1.01 | 1.00 | 0.98 | 1 | 0 | 0 | 0 | 1 | 1 | 0 | 0 | 0 |
| 297 | taxifolin-(+/-)                                                       | 1.04 | 1.01 | 1.03 | 0 | 0 | 0 | 0 | 1 | 1 | 0 | 0 | 0 |
| 298 | amisulpride                                                           | 1.01 | 1.02 | 1.04 | 0 | 0 | 0 | 0 | 1 | 1 | 0 | 0 | 0 |
| 299 | cpd00042823                                                           | 1.01 | 0.98 | 1.02 | 0 | 0 | 0 | 0 | 1 | 1 | 0 | 0 | 0 |
| 300 | taxifolin-(+)                                                         | 1.03 | 1.02 | 1.04 | 0 | 0 | 0 | 0 | 1 | 1 | 0 | 0 | 0 |
| 301 | zacopride                                                             | 1.05 | 1.04 | 1.02 | 1 | 0 | 0 | 0 | 1 | 1 | 0 | 0 | 0 |
| 302 | cefepodoxime proxetil                                                 | 1.04 | 1.01 | 1.04 | 0 | 0 | 0 | 0 | 1 | 1 | 0 | 0 | 0 |
| 303 | hyperoside                                                            | 1.01 | 0.99 | 0.98 | 1 | 0 | 0 | 0 | 1 | 1 | 0 | 0 | 0 |
| 304 | gr 89696 benactyzine                                                  | 1.02 | 1.04 | 0.97 | 1 | 0 | 0 | 1 | 0 | 1 | 0 | 0 | 0 |
| 305 | hydrochloride                                                         | 1.01 | 1.01 | 0.97 | 1 | 0 | 0 | 0 | 1 | 1 | 0 | 0 | 0 |
| 306 | roxatidine acetate hcl                                                | 1.03 | 1.01 | 0.97 | 1 | 0 | 1 | 0 | 1 | 0 | 0 | 1 | 0 |
| 307 | viramune                                                              | 1.03 | 1.03 | 0.98 | 1 | 0 | 0 | 0 | 1 | 1 | 0 | 0 | 0 |
| 308 | nalbuphine                                                            | 1.04 | 1.03 | 1.02 | 1 | 0 | 0 | 0 | 1 | 1 | 0 | 0 | 0 |
| 309 | tropisetron hcl                                                       | 1.02 | 1.05 | 0.99 | 1 | 0 | 0 | 1 | 0 | 1 | 0 | 0 | 0 |
| 310 | delta1-hydrocortisone 21-hemisuccinate sodium salt                    | 1.01 | 1.02 | 0.98 | 1 | 0 | 0 | 0 | 1 | 1 | 0 | 0 | 0 |
| 311 | ranolazine                                                            | 1.01 | 1.03 | 0.99 | 1 | 0 | 0 | 0 | 1 | 1 | 0 | 0 | 0 |
| 312 | dihydrochloride                                                       | 1.01 | 1.03 | 0.99 | 1 | 0 | 0 | 0 | 1 | 1 | 0 | 0 | 0 |
| 313 | procarbazine hcl                                                      | 0.98 | 1.01 | 0.99 | 1 | 0 | 0 | 0 | 1 | 1 | 0 | 0 | 0 |
| 314 | fluticasone propionate                                                | 1.01 | 1.04 | 0.99 | 1 | 0 | 0 | 0 | 1 | 1 | 0 | 0 | 0 |
| 315 | pefloxacin mesylate                                                   | 1.02 | 0.91 | 0.99 | 0 | 1 | 0 | 0 | 0 | 0 | 0 | 0 | 1 |
| 316 | 3-hydroxy-1,2-dimethyl-4(1h)-pyridone                                 | 1.00 | 1.03 | 1.03 | 0 | 0 | 0 | 0 | 1 | 1 | 0 | 0 | 0 |
| 317 | pioqilazone hcl                                                       | 1.00 | 1.02 | 0.99 | 1 | 0 | 0 | 0 | 1 | 1 | 0 | 0 | 0 |
| 318 | dichloroacetic acid                                                   | 1.01 | 0.99 | 0.98 | 1 | 0 | 0 | 0 | 1 | 1 | 0 | 0 | 0 |
| 319 | venlafaxine hcl                                                       | 1.01 | 1.02 | 0.99 | 1 | 0 | 0 | 0 | 1 | 1 | 0 | 0 | 0 |
| 320 | bupropion hydrochloride                                               | 1.02 | 0.99 | 0.99 | 0 | 0 | 0 | 0 | 1 | 1 | 0 | 0 | 0 |
| 321 | actarit                                                               | 1.08 | 0.97 | 1.05 | 0 | 1 | 0 | 0 | 0 | 0 | 0 | 0 | 1 |
| 322 | bifemelane                                                            | 0.91 | 0.31 | 1.03 | 0 | 1 | 0 | 0 | 0 | 0 | 0 | 0 | 1 |
| 323 | oxaprozin                                                             | 0.99 | 0.86 | 0.99 | 0 | 1 | 0 | 0 | 0 | 0 | 0 | 0 | 1 |
| 324 | piroxicam                                                             | 0.99 | 0.96 | 0.98 | 0 | 0 | 0 | 0 | 1 | 1 | 0 | 0 | 0 |
| 325 | naltrindole                                                           | 1.04 | 1.05 | 1.03 | 1 | 0 | 0 | 0 | 1 | 1 | 0 | 0 | 0 |
| 326 | rifapentine                                                           | 0.99 | 1.03 | 0.98 | 1 | 0 | 0 | 0 | 1 | 1 | 0 | 0 | 0 |
| 327 | isoquercetrin                                                         | 1.00 | 1.01 | 0.99 | 1 | 0 | 0 | 0 | 1 | 1 | 0 | 0 | 0 |
| 328 | paroxetine                                                            | 0.97 | 0.33 | 1.04 | 0 | 1 | 0 | 0 | 0 | 0 | 0 | 0 | 1 |
| 329 | risperidone                                                           | 1.01 | 1.07 | 1.00 | 1 | 0 | 0 | 1 | 0 | 1 | 0 | 0 | 0 |
| 330 | icariin                                                               | 1.04 | 1.03 | 1.00 | 1 | 0 | 0 | 0 | 1 | 1 | 0 | 0 | 0 |
| 330 | 10h-phenothiazine                                                     | 0.19 | 0.05 | 1.04 | 0 | 1 | 0 | 0 | 0 | 0 | 0 | 0 | 1 |

|     |                           |      |      |      |     |     |     |     |     |     |     |    |     |
|-----|---------------------------|------|------|------|-----|-----|-----|-----|-----|-----|-----|----|-----|
| 331 | moxonidine hcl            | 0.99 | 1.02 | 1.00 | 1   | 0   | 0   | 0   | 1   | 1   | 0   | 0  | 0   |
| 332 | loxoprofen sodium         | 1.01 | 1.01 | 0.99 | 1   | 0   | 0   | 0   | 1   | 1   | 0   | 0  | 0   |
| 333 | loxapine succinate        | 0.95 | 0.90 | 1.04 | 0   | 1   | 0   | 0   | 0   | 0   | 0   | 0  | 1   |
| 334 | tranilast                 | 1.01 | 1.04 | 1.00 | 1   | 0   | 0   | 0   | 1   | 1   | 0   | 0  | 0   |
|     | pantoprazole sodium       |      |      |      |     |     |     |     |     |     |     |    |     |
| 335 | salt                      | 1.01 | 1.05 | 1.00 | 1   | 0   | 0   | 0   | 1   | 1   | 0   | 0  | 0   |
| 336 | oxymetholone              | 0.83 | 0.05 | 1.00 | 0   | 1   | 0   | 0   | 0   | 0   | 0   | 0  | 1   |
| 337 | levocetirizine            | 1.01 | 1.05 | 0.99 | 1   | 0   | 0   | 1   | 0   | 1   | 0   | 0  | 0   |
| 338 | ornidazole                | 1.06 | 1.02 | 0.99 | 1   | 0   | 1   | 0   | 1   | 0   | 0   | 1  | 0   |
| 339 | felbamate                 | 1.01 | 1.02 | 0.99 | 1   | 0   | 0   | 0   | 1   | 1   | 0   | 0  | 0   |
| 340 | diazoxide                 | 1.01 | 0.99 | 0.99 | 0   | 0   | 0   | 0   | 1   | 1   | 0   | 0  | 0   |
| 341 | acarbose                  | 1.03 | 1.05 | 1.00 | 1   | 0   | 0   | 0   | 1   | 1   | 0   | 0  | 0   |
| 342 | 2,3-dideoxyinosine        | 1.04 | 1.04 | 1.00 | 1   | 0   | 0   | 0   | 1   | 1   | 0   | 0  | 0   |
| 343 | raclopride                | 0.99 | 1.03 | 1.04 | 0   | 0   | 0   | 0   | 1   | 1   | 0   | 0  | 0   |
| 344 | toradol                   | 0.97 | 0.99 | 0.99 | 0   | 0   | 0   | 0   | 1   | 1   | 0   | 0  | 0   |
| 345 | pramipexole hcl           | 1.01 | 1.05 | 1.00 | 1   | 0   | 0   | 0   | 1   | 1   | 0   | 0  | 0   |
| 346 | milnacipran               | 0.99 | 1.00 | 0.99 | 1   | 0   | 0   | 0   | 1   | 1   | 0   | 0  | 0   |
| 347 | terazosin                 | 1.01 | 1.01 | 1.04 | 0   | 0   | 0   | 0   | 1   | 1   | 0   | 0  | 0   |
| 348 | sumatriptan succinate     | 1.03 | 0.98 | 0.99 | 0   | 0   | 0   | 0   | 1   | 1   | 0   | 0  | 0   |
| 349 | pentoxifylline            | 1.00 | 1.03 | 0.99 | 1   | 0   | 0   | 0   | 1   | 1   | 0   | 0  | 0   |
| 350 | nicorandil                | 1.05 | 1.05 | 0.99 | 1   | 0   | 1   | 1   | 0   | 0   | 1   | 0  | 0   |
| 351 | betaxolol hydrochloride   | 0.98 | 1.01 | 0.99 | 1   | 0   | 0   | 0   | 1   | 1   | 0   | 0  | 0   |
| 352 | lamivudine                | 1.01 | 1.04 | 1.01 | 1   | 0   | 0   | 0   | 1   | 1   | 0   | 0  | 0   |
| 353 | modafinil                 | 1.03 | 1.03 | 1.01 | 1   | 0   | 0   | 0   | 1   | 1   | 0   | 0  | 0   |
| 354 | vinorelbine bitartrate    | 1.04 | 1.12 | 1.00 | 1   | 0   | 0   | 1   | 0   | 1   | 0   | 0  | 0   |
| 355 | dofetilide                | 1.04 | 1.05 | 1.00 | 1   | 0   | 0   | 0   | 1   | 1   | 0   | 0  | 0   |
| 356 | glycopyrrolate            | 0.99 | 1.00 | 1.00 | 0   | 0   | 0   | 0   | 1   | 1   | 0   | 0  | 0   |
| 357 | rutin                     | 1.06 | 0.99 | 1.00 | 0   | 1   | 1   | 0   | 1   | 0   | 0   | 1  | 0   |
| 358 | esmolol hydrochloride     | 1.01 | 1.05 | 1.01 | 1   | 0   | 0   | 0   | 1   | 1   | 0   | 0  | 0   |
| 359 | montelukast na            | 1.02 | 0.97 | 1.00 | 0   | 0   | 0   | 0   | 1   | 1   | 0   | 0  | 0   |
|     | dexbrompheniramine        |      |      |      |     |     |     |     |     |     |     |    |     |
| 360 | maleate                   | 1.03 | 1.00 | 1.00 | 0   | 0   | 0   | 0   | 1   | 1   | 0   | 0  | 0   |
| 361 | 2-(2-aminoethyl)pyridine  | 1.02 | 1.02 | 1.00 | 1   | 0   | 0   | 0   | 1   | 1   | 0   | 0  | 0   |
|     | 1,1-dimethyl-4-           |      |      |      |     |     |     |     |     |     |     |    |     |
|     | phenylpiperazinium        |      |      |      |     |     |     |     |     |     |     |    |     |
| 362 | iodide                    | 1.01 | 1.02 | 1.00 | 1   | 0   | 0   | 0   | 1   | 1   | 0   | 0  | 0   |
| 363 | physostigmine             | 1.03 | 1.01 | 1.00 | 1   | 0   | 0   | 0   | 1   | 1   | 0   | 0  | 0   |
| 364 | azasetron                 | 1.00 | 1.02 | 1.00 | 1   | 0   | 0   | 0   | 1   | 1   | 0   | 0  | 0   |
| 365 | irbesartan                | 1.01 | 1.02 | 1.00 | 1   | 0   | 0   | 0   | 1   | 1   | 0   | 0  | 0   |
| 366 | doxylamine succinate      | 0.96 | 1.02 | 1.00 | 1   | 0   | 0   | 0   | 1   | 1   | 0   | 0  | 0   |
| 367 | lomifylline               | 0.98 | 1.02 | 1.01 | 1   | 0   | 0   | 0   | 1   | 1   | 0   | 0  | 0   |
|     | 1h-imidazol-2-amine, n-   |      |      |      |     |     |     |     |     |     |     |    |     |
|     | (2,6-dichlorophenyl)-4,5- |      |      |      |     |     |     |     |     |     |     |    |     |
| 368 | dihydro                   | 1.04 | 1.05 | 1.00 | 1   | 0   | 0   | 0   | 1   | 1   | 0   | 0  | 0   |
| 369 | 2,3-dideoxycytidine       | 1.02 | 1.02 | 1.00 | 1   | 0   | 0   | 0   | 1   | 1   | 0   | 0  | 0   |
| 370 | topotecan hcl             | 1.03 | 0.89 | 1.02 | 0   | 1   | 0   | 0   | 0   | 0   | 0   | 0  | 1   |
| 371 | fenoldopam mesylate       | 1.02 | 1.02 | 1.02 | 0   | 0   | 0   | 0   | 1   | 1   | 0   | 0  | 0   |
|     | 6h-pyrido[2,3-            |      |      |      |     |     |     |     |     |     |     |    |     |
|     | b][1,4]benzodiazepin-6-   |      |      |      |     |     |     |     |     |     |     |    |     |
|     | one, 11-[[2-              |      |      |      |     |     |     |     |     |     |     |    |     |
|     | [[diethylamino)methyl]-1- |      |      |      |     |     |     |     |     |     |     |    |     |
|     | piperidiny]acetyl]5,11-   |      |      |      |     |     |     |     |     |     |     |    |     |
| 372 | dihydro                   | 1.05 | 1.06 | 1.00 | 1   | 0   | 0   | 1   | 0   | 1   | 0   | 0  | 0   |
| 373 | escitalopram oxalate      | 0.98 | 1.03 | 1.02 | 1   | 0   | 0   | 0   | 1   | 1   | 0   | 0  | 0   |
|     | formoterol fumarate       |      |      |      |     |     |     |     |     |     |     |    |     |
| 374 | dihydrate                 | 0.99 | 1.02 | 1.01 | 1   | 0   | 0   | 0   | 1   | 1   | 0   | 0  | 0   |
| 375 | topiramate                | 1.03 | 1.01 | 1.02 | 0   | 0   | 0   | 0   | 1   | 1   | 0   | 0  | 0   |
| 376 | 2-chloroadenosine         | 1.02 | 1.03 | 1.01 | 1   | 0   | 0   | 0   | 1   | 1   | 0   | 0  | 0   |
| 377 | cilastatin na             | 1.02 | 1.04 | 1.02 | 1   | 0   | 0   | 0   | 1   | 1   | 0   | 0  | 0   |
| 378 | irsogladine maleate       | 1.03 | 1.00 | 1.02 | 0   | 0   | 0   | 0   | 1   | 1   | 0   | 0  | 0   |
| 379 | torasemide                | 1.01 | 1.06 | 1.02 | 1   | 0   | 0   | 0   | 1   | 1   | 0   | 0  | 0   |
| 380 | 5-fluoro-2-pyrimidone     | 1.04 | 1.03 | 1.01 | 1   | 0   | 0   | 0   | 1   | 1   | 0   | 0  | 0   |
| 381 | valsartan                 | 1.02 | 1.06 | 1.01 | 1   | 0   | 0   | 0   | 1   | 1   | 0   | 0  | 0   |
| 382 | milrinone                 | 1.01 | 1.10 | 1.01 | 1   | 0   | 0   | 1   | 0   | 1   | 0   | 0  | 0   |
| 383 | pravastatin sodium        | 0.99 | 0.73 | 1.03 | 0   | 1   | 0   | 0   | 0   | 0   | 0   | 0  | 1   |
| 384 | rizatriptan benzoate      | 1.00 | 1.04 | 1.02 | 1   | 0   | 0   | 0   | 1   | 1   | 0   | 0  | 0   |
| 385 | tadalafil                 | 1.04 | 1.06 | 1.03 | 1   | 0   | 0   | 0   | 1   | 1   | 0   | 0  | 0   |
| 386 | levetiracetam             | 1.03 | 1.06 | 1.03 | 1   | 0   | 0   | 0   | 1   | 1   | 0   | 0  | 0   |
| 387 | miglitol                  | 1.03 | 1.05 | 1.03 | 1   | 0   | 0   | 0   | 1   | 1   | 0   | 0  | 0   |
| 388 | chlorpheniramine          | 1.00 | 1.02 | 1.02 | 0   | 0   | 0   | 0   | 1   | 1   | 0   | 0  | 0   |
|     | citalopram                |      |      |      |     |     |     |     |     |     |     |    |     |
| 389 | hydrobromide              | 0.99 | 0.97 | 1.02 | 0   | 0   | 0   | 0   | 0   | 1   | 0   | 0  | 0   |
| 390 | ftorafur                  | 1.00 | 1.02 | 1.03 | 0   | 0   | 0   | 0   | 1   | 1   | 0   | 0  | 0   |
| 391 | itopride hcl              | 1.01 | 1.04 | 1.02 | 1   | 0   | 0   | 0   | 1   | 1   | 0   | 0  | 0   |
| 392 | benproperine phosphate    | 0.87 | 0.91 | 1.03 | 0   | 0   | 0   | 0   | 0   | 1   | 0   | 0  | 0   |
| 393 | rifaximin                 | 1.03 | 1.05 | 1.02 | 1   | 0   | 0   | 0   | 1   | 1   | 0   | 0  | 0   |
| 394 | pazufloxacin              | 1.02 | 0.99 | 1.04 | 0   | 0   | 0   | 0   | 0   | 1   | 0   | 0  | 0   |
| 395 | sulfasalazine             | 1.05 | 1.07 | 1.05 | 1   | 0   | 0   | 0   | 1   | 1   | 0   | 0  | 0   |
| 396 | indarubicin               | 1.03 | 1.04 | 1.04 | 0   | 0   | 0   | 0   | 1   | 1   | 0   | 0  | 0   |
| 397 | enalaprilat               | 0.98 | 1.02 | 1.04 | 0   | 0   | 0   | 0   | 1   | 1   | 0   | 0  | 0   |
|     |                           |      |      |      | 246 | 121 | 122 | 104 | 215 | 232 | 74  | 31 | 60  |
|     |                           |      |      |      | 62% | 30% | 31% | 26% | 54% | 58% | 19% | 8% | 15% |

**Supplementary Table 9.** IC50 value for each strain-drug combination ( $\mu\text{M}$ ).

|              | <i>pdr5</i> $\Delta$ | <i>pdr10</i> $\Delta$ | <i>pdr11</i> $\Delta$ | <i>pdr12</i> $\Delta$ | <i>pdr15</i> $\Delta$ | <i>snq2</i> $\Delta$ | <i>ynr070w</i> $\Delta$ | <i>aus1</i> $\Delta$ | <i>yol075c</i> $\Delta$ |
|--------------|----------------------|-----------------------|-----------------------|-----------------------|-----------------------|----------------------|-------------------------|----------------------|-------------------------|
| Fluconazole  | 37                   | 59                    | 66                    | 61                    | 67                    | 61                   | 63                      | 64                   | 64                      |
| Ketoconazole | 1.5                  | 1.9                   | 1.8                   | 1.9                   | 1.9                   | 1.9                  | 1.6                     | 1.9                  | 1.8                     |
| Miconazole   | 0.17                 | 0.22                  | 0.16                  | 0.20                  | 0.21                  | 0.20                 | 0.20                    | 0.20                 | 0.20                    |
| Itraconazole | 2                    | 13                    | 6                     | 8                     | 8                     | 12                   | 6                       | 8                    | 10                      |
| Tamoxifen    | 10                   | 22                    | 10                    | 22                    | 22                    | 22                   | 22                      | 22                   | 22                      |
| CCCP         | 17                   | 17                    | 18                    | 19                    | 17                    | 7                    | 15                      | 16                   | 19                      |

|              | <i>adp1</i> $\Delta$ | <i>ycf1</i> $\Delta$ | <i>vmr1</i> $\Delta$ | <i>nft1</i> $\Delta$ | <i>bpt1</i> $\Delta$ | <i>ybt1</i> $\Delta$ | <i>yor1</i> $\Delta$ | Monster | Non-mutant |
|--------------|----------------------|----------------------|----------------------|----------------------|----------------------|----------------------|----------------------|---------|------------|
| Fluconazole  | 62                   | 34                   | 61                   | 64                   | 64                   | 63                   | 67                   | 1       | 60         |
| Ketoconazole | 1.9                  | 1.7                  | 2.1                  | 1.7                  | 1.5                  | 1.9                  | 1.7                  | 0.01    | 1.7        |
| Miconazole   | 0.20                 | 0.29                 | 0.15                 | 0.19                 | 0.31                 | 0.21                 | 0.33                 | 0.01    | 0.20       |
| Itraconazole | 8                    | 6                    | 6                    | 7                    | 7                    | 7                    | 11                   | 0.006   | 8          |
| Tamoxifen    | 22                   | 22                   | 22                   | 26                   | 22                   | 22                   | 22                   | 3.0     | 22         |
| CCCP         | 19                   | 17                   | 18                   | 21                   | 16                   | 14                   | 19                   | 5.1     | 14         |

**Supplementary Table 10.** Relative fitness values for the ABC16-monster and the multiplicative model based on single mutant relative fitness. Relative fitness was normalized to the fitness of non-mutant.

**Miconazole**

| Concentration the non-mutant ( $\mu\text{M}$ ) | ABC16 fitness normalized to the non-mutant fitness | Multiplicative model based on normalized single mutant fitness |
|------------------------------------------------|----------------------------------------------------|----------------------------------------------------------------|
| 6.0                                            | 0                                                  | 546876                                                         |
| 1.4                                            | 0.3                                                | 3645889                                                        |
| 0.3                                            | 0.08                                               | 37                                                             |
| 0.08                                           | 0.03                                               | 12                                                             |
| 0                                              | 0.9                                                | 0.9                                                            |

**Tamoxifen**

| Concentration the non-mutant ( $\mu\text{M}$ ) | ABC16 fitness normalized to the non-mutant fitness | Multiplicative model based on normalized single mutant fitness |
|------------------------------------------------|----------------------------------------------------|----------------------------------------------------------------|
| 40                                             | 0                                                  | 0                                                              |
| 17                                             | 0                                                  | 1.5                                                            |
| 7.6                                            | 1.1                                                | 2.8                                                            |
| 3.3                                            | 1.0                                                | 7.9                                                            |
| 0                                              | 1.0                                                | 0.4                                                            |

**Fluconazole**

| Concentration the non-mutant ( $\mu\text{M}$ ) | ABC16 fitness normalized to the non-mutant fitness | Multiplicative model based on normalized single mutant fitness |
|------------------------------------------------|----------------------------------------------------|----------------------------------------------------------------|
| 60                                             | 0                                                  | 1964956                                                        |
| 13                                             | 0                                                  | 0.8                                                            |
| 2.8                                            | 0.005                                              | 2.7                                                            |
| 0.6                                            | 1.0                                                | 3.4                                                            |
| 0                                              | 0.8                                                | 0.6                                                            |

**CCCP**

| Concentration the non-mutant ( $\mu\text{M}$ ) | ABC16 fitness normalized to the non-mutant fitness | Multiplicative model based on normalized single mutant fitness |
|------------------------------------------------|----------------------------------------------------|----------------------------------------------------------------|
| 60                                             | 0                                                  | 0                                                              |
| 14                                             | 0.2                                                | 0                                                              |
| 3.5                                            | 0.8                                                | 0.08                                                           |
| 0.8                                            | 0.7                                                | 0.01                                                           |
| 0                                              | 1.0                                                | 0.001                                                          |

**Ketoconazole**

| Concentration the non-mutant ( $\mu\text{M}$ ) | ABC16 fitness normalized to the non-mutant fitness | Multiplicative model based on normalized single mutant fitness |
|------------------------------------------------|----------------------------------------------------|----------------------------------------------------------------|
| 9.0                                            | 0.2                                                | 42154888                                                       |
| 1.3                                            | 0                                                  | 1.2                                                            |
| 0.2                                            | 0                                                  | 6.3                                                            |
| 0.03                                           | 0                                                  | 11                                                             |
| 0                                              | 1.1                                                | 11                                                             |

**Valinomycin**

| Concentration the non-mutant ( $\mu\text{M}$ ) | ABC16 fitness normalized to the non-mutant fitness | Multiplicative model based on normalized single mutant fitness |
|------------------------------------------------|----------------------------------------------------|----------------------------------------------------------------|
| 90                                             | 1.6                                                | 30                                                             |
| 34                                             | 1.8                                                | 47                                                             |
| 13                                             | 1.8                                                | 42                                                             |
| 5.0                                            | 1.6                                                | 45                                                             |
| 0                                              | 1.0                                                | 1.6                                                            |

**Itraconazole**

| Concentration the non-mutant ( $\mu\text{M}$ ) | ABC16 fitness normalized to the non-mutant fitness | Multiplicative model based on normalized single mutant fitness |
|------------------------------------------------|----------------------------------------------------|----------------------------------------------------------------|
| 20                                             | -0.3                                               | 20161239574                                                    |
| 4.8                                            | 0.003                                              | 0.009                                                          |
| 1.2                                            | 0.005                                              | 0.9                                                            |
| 0.3                                            | 0.03                                               | 22468                                                          |
| 0                                              | 0.9                                                | 1.8                                                            |

**Supplementary Table 11.** Deletions not detected in diploid-selection mixtures or isolated and genotyped sorted cells in the *en masse* Green Monster processes.

NA: not applicable. ND: not determined.

|                                      | Round |                                                     |                                                                                                         |                                                                                                                           |                                                  |                                                                   |
|--------------------------------------|-------|-----------------------------------------------------|---------------------------------------------------------------------------------------------------------|---------------------------------------------------------------------------------------------------------------------------|--------------------------------------------------|-------------------------------------------------------------------|
|                                      | 0     | 1                                                   | 2                                                                                                       | 3                                                                                                                         | 4                                                | 5                                                                 |
| Diploid-selection pool from Series 1 | None  | <i>ynr070w</i> Δ<br><i>yor1</i> Δ                   | <i>ynr070w</i> Δ<br><i>vmr1</i> Δ<br><i>pdr5</i> Δ                                                      | <i>ynr070w</i> Δ<br><i>yor1</i> Δ<br><i>vmr1</i> Δ<br><i>aus1</i> Δ<br><i>pdr5</i> Δ<br><i>ybt1</i> Δ<br><i>yol075c</i> Δ | ND                                               | ND                                                                |
| Diploid-selection pool from Series 2 | None  | <i>ynr070w</i> Δ<br><i>pdr5</i> Δ<br><i>pdr15</i> Δ | <i>ynr070w</i> Δ<br><i>vmr1</i> Δ<br><i>aus1</i> Δ<br><i>pdr5</i> Δ<br><i>pdr10</i> Δ<br><i>pdr15</i> Δ | <i>ynr070w</i> Δ<br><i>vmr1</i> Δ<br><i>aus1</i> Δ<br><i>pdr5</i> Δ<br><i>pdr10</i> Δ<br><i>pdr15</i> Δ                   | ND                                               | ND                                                                |
| Diploid-selection pool from Series 3 | None  | <i>pdr5</i> Δ                                       | <i>ynr070w</i> Δ<br><i>vmr1</i> Δ<br><i>aus1</i> Δ<br><i>pdr5</i> Δ<br><i>pdr15</i> Δ                   | <i>ynr070w</i> Δ<br><i>vmr1</i> Δ<br><i>bpt1</i> Δ<br><i>aus1</i> Δ<br><i>pdr5</i> Δ<br><i>pdr10</i> Δ                    | ND                                               | ND                                                                |
| Isolated and genotyped sorted cells  | NA    | <i>aus1</i> Δ                                       | <i>aus1</i> Δ<br><i>pdr15</i> Δ                                                                         | <i>vmr1</i> Δ<br><i>aus1</i> Δ<br><i>pdr5</i> Δ<br><i>pdr15</i> Δ                                                         | <i>vmr1</i> Δ<br><i>pdr5</i> Δ<br><i>pdr15</i> Δ | <i>vmr1</i> Δ<br><i>aus1</i> Δ<br><i>pdr5</i> Δ<br><i>pdr10</i> Δ |



**Supplementary Table 12.** Drug concentrations used to characterize *ho* non-mutant control, the ABC16-monster (*MATa*), and sixteen single mutant strains. After learning the heightened sensitivity, the ABC16-monster was treated differently in the second round using lower concentrations for most drugs. The unit is  $\mu\text{M}$ . \* indicates special ketoconazole concentrations used only for the *pdr5* $\Delta$  mutant. The solvent was dimethyl sulfoxide (DMSO) for all drugs.

|              | First round of assay |      |     |     |    | Second round of assay |       |       |       |       |                         |      |      |      |     |
|--------------|----------------------|------|-----|-----|----|-----------------------|-------|-------|-------|-------|-------------------------|------|------|------|-----|
|              | All strains          |      |     |     |    | ABC16-monster         |       |       |       |       | The rest of the strains |      |      |      |     |
| Valinomycin  | 0                    | 5    | 13  | 34  | 90 | 0                     | 50    | 100   | 200   | 400   | 0                       | 50   | 100  | 200  | 400 |
| Fluconazole  | 0                    | 0.6  | 3   | 13  | 60 | 0                     | 1     | 3     | 5     | 7     | 0                       | 20   | 50   | 80   | 110 |
| Tamoxifen    | 0                    | 3    | 8   | 17  | 40 | 0                     | 6     | 9     | 12    | 15    | 0                       | 20   | 25   | 30   | 35  |
| Miconazole   | 0                    | 0.08 | 0.3 | 1.4 | 6  | 0                     | 0.02  | 0.08  | 0.14  | 0.2   | 0                       | 0.06 | 0.24 | 0.42 | 0.6 |
| Itraconazole | 0                    | 0.3  | 1.2 | 5   | 20 | 0                     | 0.01  | 0.04  | 0.07  | 0.1   | 0                       | 2    | 8    | 14   | 20  |
| CCCP         | 0                    | 0.8  | 3   | 14  | 60 | 0                     | 1     | 5     | 9     | 13    | 0                       | 7    | 17   | 27   | 37  |
| Ketoconazole | 0                    | 0.03 | 0.2 | 1.3 | 9  | 0                     | 0.005 | 0.013 | 0.021 | 0.029 | 0                       | 3    | 5    | 7    | 9   |
|              |                      |      |     |     |    |                       |       |       |       |       | 0                       | 1    | 2    | 3    | 4 * |

**Supplementary Table 13.** List of primers.

**Construction of universal tetO2pr-GFP deletion cassettes**

Amplification of GFP

CGGGATCCATGAGTAAAGGAGAAGAAC  
AGTCCGGGCCCTTATTTGTATAGTTCATCCATG

Amplification of ADHterm-tetO2-GFP-CYC1term

CAAGCTCCTCGAGTAATTCG  
CATGATTACGCCAAGCTTG

Amplification of URA3

GCCGCTCGAGCTTTTCAATTCAATTCATC  
GGGGTACCGGTAATAACTGATATAAT

Amplification of HphMX4

GCTCTAGAACATGGAGGCCCGAATACCC  
AAGGAAAAAGCGGCCGCCAGTATAGCGACCAGCATTAC

Site-directed mutagenesis to introduce the S65T change in GFP

CACTTGCTACTACTTTCACTTATGGTGTTCAATGC  
GCATTGAACACCATAAGTGAAAGTAGTGACAAGTG

Generation of the URA3 GFP deletion cassette

GGATCCCCGGGTTAATTAAGGCGCGCCAGATCTGTTTAGCTTGCCCAAGCTCCTCGAGTAATTCG  
GGCGTTAGTATCGAATCGACAGCAGTATAGCGACCAGCATTACGTACCGGTAATAACTGATATAAT

Generation of the HphMX4 GFP deletion cassette

GGATCCCCGGGTTAATTAAGGCGCGCCAGATCTGTTTAGCTTGCCCAAGCTCCTCGAGTAATTCG  
CAGTATAGCGACCAGCATTAC

**Construction of GMToolkits**

Amplification of KanMX4

GCTCTAGAAGCTTGCCTCGTCCCCGCCGGGTC  
CACCGCTCGAGTCGACACTGGATGGCGGCGTTAG

Amplification of CMVpr-rtTA

CGGGGTACCCATGATTACGCCAAGCTTG  
CATCGAGCTAGCCTTATACGATCCTCGCGCCCCCTAC

Generation of the CMVpr-rtTA KanMX4 fragment for integration

GGAAGACGATAAGGTTAAGATAAGTAGATAAGAGAATGATACGAGCATGATTACGCCAAGCTTG  
GGAGTTAAGAAGTCTGAAGAACTCTGAAATAAACTTTTCGATTGACGACAGTCGACACTGGATGGCGGCGTTAG

Amplification of NatMX4

GCTCTAGAAGCTTGCCTCGTCCCCGCCGGGTC  
CACCGCTCGAGTCGACACTGGATGGCGGCGTTAG

Amplification of STE3pr-LEU2

CGCGGATCCGTCGACCCAAGTTACCTAAGAGGTGTACGA  
GACGTACAGTGGGCCCTTAAGCAAGGATTTTCTTAACTTCTTC

Amplification of CMVpr-rtTA

CATCGAGCTAGCCATGATTACGCCAAGCTTG  
CATCGAGCTAGCCTTATACGATCCTCGCGCCCCCTAC

Generation of the CMVpr-rtTA NatMX4 STE3pr-LEU2 fragment for integration

GGAAGACGATAAGGTTAAGATAAGTAGATAAGAGAATGATACGAGCATGATTACGCCAAGCTTG  
GCGAAATGGCGTGAAATGTGATCAAAGGTAATAAAACGTCATATTTAAGCAAGGATTTTCTTAACTTCTTC

**Genotyping ABC transporter loci during the Green Monster assembly**

ynr070w $\Delta$

GCTTCTGAACAAGGGATTCATC

ygr281w $\Delta$

GCTATACAAGAACAGGAAGAACG

ycr011c $\Delta$

CGATTTACAGAACTTGCACAC

ydr135c $\Delta$

CATAGTACGCTTGTATGCTGC

yhl035c $\Delta$

GTAATAAATGTCAAATCGCTAGCTC

ydr011w $\Delta$

CTCCTTCCATTGATTAGAGTTC

yil015w $\Delta$

GTTGATCGTATTGTTTGCCTAG

yor011w $\Delta$

CATACTTGAGAAGGCATTAGC

ypl058c $\Delta$

CAACCATGGTACAAGGTAGTTCTC

yor153w $\Delta$

CGTGGTACGATATCTGTTGAAC

ykr104w $\Delta$

CGTATGTACGTTATATCTTCGTGC

ykr103w $\Delta$

CCATAGCGTAAGTCTGGCGTTC

yil013c $\Delta$

CCTTTTCTCATTAGTTCGTAAAC

yil048c $\Delta$

GTGTGCGCATCTGCAAAGAACG

yol075c $\Delta$

GCAGAAGTAGGCACAAGTGCTTGG

yor328w $\Delta$

CACCTGCTGTCATCAGTACC

ydr406w $\Delta$

CGTCATATGCAGTATTCAAGTATAC

Universal genotyping primer

CGAATTACTCGAGGAGCTTG

**Test for recombination between GFP cassettes within ABC transporter loci**

YCR011C

AGACAGGAAGTCGAGCGTGT

ATCTCGCTGCAGATGACCTT

YDR011W  
GTTGAAGTGTGCGAGGTCA  
TTTTGAGTCGAAACCCAAGG

YDR135C  
CAAACAACGTTTCCACCTCA  
AGTGCATTACCCCGCATAAG

YDR406W  
GATCGGAAAGGGAGCATGTA  
AAAAAGGCCGGTACGAGTTT

YGR281W  
CAGGAAGAACGCATTTCCAT  
CGTTGTCCAGTTTGCCTCAT

YHL035C  
CGCCCCTGTTTTATTTTCAA  
AAGAGGGCGAATCCTTCAAT

YIL013C  
CCACATAGACGGCCACTTTT  
TTTCTCGAACCTGGAATGCT

YKR103W  
ACTGCAATTCAGGGTGTCC  
CCAGTCTGAAAGCCGGTAAA

YLL015W  
GGCTGCTATCCCACAATGTT  
TTGCGAGTTGCGTTTATCTG

YLL048C  
TGCCAGTCGCTTTTTCTTTT  
TACAGGTGTGACCGATTGGA

YNR070W  
GCGATACGGAATTGAGGTGT  
TCATACCGGCAATGTTGAAA

YOL075C  
CAAGTGCTTGGCAGTTTTCA  
TTGAGGAGTTGTTGCGATGA

YOR011W  
ACAGCCACAGCAGCTTACCT  
TGTGGAGATCATCGGTTCAA

YOR153W  
CACCCTTTGGACTCGTGATT  
TCGCATTTTGGAGCAGTTTTG

YOR328W  
GCTTTGTTCCACGGACTGAT  
GCTAGGGCAGCAAGTTCATC

YPL058C  
TCACGGTTCCTAACCTGGTC  
TCCCCGCATAGACTTGAATC

**Genotyping the second set of loci during the Green Monster assembly**

yer042wΔ

AGTGTTGCAGAATCGAGAAGAG  
TCATAAATAAGGGCACGTACAC

ycl033cΔ

AAGAATCCTTGGAGGCTTCAAC  
GTCCACGATCTCAAACCCTTTC

ydl227cΔ

CTCTGTTCCCTCTCATATTTAC  
CTACTCCAGCATTCTAGTTAAG

yol118cΔ

ACACATACCAGGATGCTTCTTC  
GCTGACTAATTTGAAGCTATCG

ydl242wΔ

TCAAGCGTTATGTCTTCGACAC  
GTTTCGATATTCGACATTTGC

ykl069wΔ

TAGCGACAGAGTGGTTCAATTC  
TCAATTTGGCGAACAGGGAATG

**Test for recombination between GFP cassettes within two nearby loci**

YDL227C upstream

TGCAGAAGCTTGTTGAAGCA

YDL227C downstream

GGATCGAATCCCTCCAAAAT

YDL242W upstream

TCTTGGAACGAGGTCTGCTT

YDL242W downstream

GTGGAGGCTGTGGTGCTTAG
